# Supplementary material for: A field-based investigation of behavioural interactions between invasive green crab (Carcinus maenas), rock crab (Cancer irroratus), and American lobster (Homarus americanus) in southern Newfoundland
Source: PeerJ. 2020 Feb 12;8:e8444. doi: 10.7717/peerj.8444 (PMC7023827; doi:10.7717/peerj.8444)
Supplement: Supplemental Information 2 [file peerj-08-8444-s011.xlsx]

## Sheet: mapping data
Date	Trap #	GPS	Lat	Lon
2016-07-04	1	616	47.5905	-54.8552
2016-07-04	2	617	47.5901	-54.8547
2016-07-04	3	618	47.5909	-54.8565
2016-07-04	4	623	47.5918	-54.857
2016-07-04	5	622	47.5906	-54.8559
2016-07-05	3	619	47.5908	-54.8538
2016-07-05	2	620	47.5912	-54.8531
2016-07-05	1	621	47.5914	-54.8524
2016-07-05	4	624	47.5905	-54.8539
2016-07-05	5	625	47.5916	-54.8519
2016-07-06	1	628	47.5922	-54.8561
2016-07-06	2	627	47.5925	-54.8555
2016-07-06	3	626	47.5926	-54.8549
2016-07-06	4	632	47.592	-54.8567
2016-07-06	5	633	47.5924	-54.8545
2016-07-07	1	629	47.5841	-54.8691
2016-07-07	2	630	47.5842	-54.8689
2016-07-07	3	631	47.584	-54.8694
2016-07-07	4	635	47.5842	-54.869
2016-07-07	5	634	47.5836	-54.8694
2016-07-18	3	636	47.5535	-54.8552
2016-07-18	2	637	47.5537	-54.8547
2016-07-18	4	638	47.5536	-54.8539
2016-07-18	1	639	47.5538	-54.8533
2016-07-18	5	640	47.554	-54.8531
2016-07-19	2	642	47.5541	-54.8521
2016-07-19	3	643	47.5544	-54.8524
2016-07-19	4	644	47.5543	-54.8532
2016-07-19	1	646	47.554	-54.8525
2016-07-19	5	645	47.5541	-54.8534
2016-08-08	1	648	47.5842	-54.8692
2016-08-08	2	649	47.5842	-54.869
2016-08-08	3	647	47.5839	-54.8693
2016-08-08	4	650	47.5837	-54.8694
2016-08-08	5	651	47.5844	-54.8685
2016-08-09	2	652	47.5844	-54.8685
2016-08-09	3	653	47.5824	-54.8706
2016-08-09	1	654	47.5831	-54.8699
2016-08-09	4	656	47.5835	-54.8695
2016-08-09	5	655	47.5822	-54.8707
2016-08-10	3	657	47.5837	-54.8693
2016-08-10	2	658	47.5841	-54.8689
2016-08-10	1	659	47.5835	-54.8694
2016-08-10	5	660	47.5834	-54.8696
2016-08-10	4	661	47.5843	-54.8686
2016-08-11	1	665	47.5841	-54.8689
2016-08-11	2	662	47.5838	-54.8693
2016-08-11	3	663	47.5835	-54.8696
2016-08-11	5	664	47.5834	-54.8696
2016-08-11	4	666	47.5843	-54.8685
2016-08-22	1	667	47.5836	-54.8694
2016-08-22	2	668	47.5838	-54.8692
2016-08-22	3	669	47.5841	-54.869
2016-08-22	5	670	47.5835	-54.8693
2016-08-22	4	671	47.5843	-54.8685
2016-08-23	3	672	47.5837	-54.8692
2016-08-23	2	673	47.5841	-54.8689
2016-08-23	1	674	47.584	-54.8689
2016-08-23	5	675	47.5835	-54.8693
2016-08-23	4	676	47.5843	-54.8685
2016-08-24	3	677	47.584	-54.8687
2016-08-24	2	678	47.5837	-54.8689
2016-08-24	1	679	47.5836	-54.869
2016-08-24	5	680	47.5836	-54.8693
2016-08-24	4	681	47.5842	-54.8684
2016-08-25	1	682	47.5822	-54.8705
2016-08-25	2	683	47.5826	-54.8702
2016-08-25	3	684	47.5829	-54.87
2016-08-25	5	685	47.583	-54.8696
2016-08-25	4	686	47.5821	-54.8705
2016-09-06	5	687	47.5831	-54.8695
2016-09-06	1	688	47.5835	-54.8692
2016-09-06	2	689	47.5838	-54.8689
2016-09-06	3	690	47.584	-54.8687
2016-09-06	4	691	47.5843	-54.8682
2016-09-07	1	692	47.5837	-54.869
2016-09-07	2	694	47.584	-54.8687
2016-09-07	3	696	47.5831	-54.8694
2016-09-07	5	697	47.5829	-54.8697
2016-09-07	4	698	47.5843	-54.8682
2016-09-08	3	699	47.5838	-54.8691
2016-09-08	1	702	47.5839	-54.8688
2016-09-08	2	701	47.5832	-54.8693
2016-09-08	5	703	47.5829	-54.8697
2016-09-08	4	704	47.5843	-54.8683
