# Supplementary material for: A field-based investigation of behavioural interactions between invasive green crab (Carcinus maenas), rock crab (Cancer irroratus), and American lobster (Homarus americanus) in southern Newfoundland
Source: PeerJ. 2020 Feb 12;8:e8444. doi: 10.7717/peerj.8444 (PMC7023827; doi:10.7717/peerj.8444)
Supplement: Supplemental Information 3 [file peerj-08-8444-s012.xlsx]

## Sheet: model data with dive 2017
Date	Deployment #	Trap #	avg lob size	Dive_set	amb.lob	amb.GC	amb.rc	Lob catch	GC catch	soak time	lobster catch rate (lob/min)	eelgrass
2016-07-05	2	3	84	A	5	0	0	1	0	1438	0.00069541	N
2016-07-05	2	2	80.5	A	5	0	0	4	0	1436	0.00278552	N
2016-07-05	2	1	81.75	A	13	0	0	4	0	1425	0.00280702	N
2016-07-06	3	3	75.5	B	20	1	5	2	0	1372	0.00145773	Y
2016-07-06	3	2	80.5	B	18	0	5	2	0	1385	0.00144404	Y
2016-07-06	3	1	77.33	B	6	8	1	3	0	1386	0.0021645	Y
2016-07-07	4	2	79	C	39	0	3	7	0	1365	0.00512821	Y
2016-07-07	4	3	77.5	C	50	0	9	4	0	1365	0.0029304	Y
2016-07-07	4	1	77.85	C	48	0	5	7	0	1365	0.00512821	Y
2016-08-09	8	3	82.86	D	14	0	0	7	0	1422	0.00492264	Y
2016-08-09	8	2	84.67	D	21	0	0	3	0	1452	0.00206612	Y
2016-08-09	8	1	80	D	7	0	1	4	0	1442	0.00277393	N
2016-08-10	9	1	77.25	E	36	0	3	4	0	1385	0.00288809	Y
2016-08-10	9	2	78	E	16	0	0	3	0	1427	0.00210231	Y
2016-08-10	9	3	76.5	E	14	0	1	2	0	1465	0.00136519	Y
2016-08-11	10	3	77.85	F	16	0	3	7	0	1346	0.00520059	Y
2016-08-11	10	2	80	F	26	0	0	5	0	1363	0.00366838	Y
2016-08-11	10	1	82.57	F	25	0	1	7	0	1382	0.00506512	Y
2016-08-23	12	3	74.75	G	33	0	3	10	0	1402	0.00713267	N
2016-08-23	12	2	85	G	26	0	0	1	0	1415	0.000706714	Y
2016-08-23	12	1	78	G	20	0	1	5	0	1448	0.00345304	Y
2016-08-24	13	1	77	H	29	0	3	2	0	1384	0.00144509	N
2016-08-24	13	2	84	H	32	0	0	3	0	1433	0.00209351	N
2016-08-24	13	3	84	H	24	0	1	7	0	1471	0.00475867	N
2016-08-25	14	1	86.38	I	15	0	2	4	0	1398	0.00286123	Y
2016-08-25	14	2	81	I	17	0	1	1	0	1386	0.000721501	N
2016-08-25	14	3	83.42	I	17	0	0	6	0	1371	0.00437637	N
2016-09-07	16	1	81.6	J	22	0	0	5	0	1449	0.00345066	Y
2016-09-07	16	2	84.67	J	18	0	1	3	0	1445	0.00207612	Y
2016-09-07	16	3	83	J	24	0	0	6	0	1393	0.00430725	N
2016-09-08	17	1	79.67	K	12	0	2	3	0	1369	0.00219138	Y
2016-09-08	17	2	83.4	K	21	0	3	5	0	1365	0.003663	Y
2016-09-08	17	3	81.86	K	36	0	2	7	0	1410	0.00496454	Y
