# Supplementary material for: A field-based investigation of behavioural interactions between invasive green crab (Carcinus maenas), rock crab (Cancer irroratus), and American lobster (Homarus americanus) in southern Newfoundland
Source: PeerJ. 2020 Feb 12;8:e8444. doi: 10.7717/peerj.8444 (PMC7023827; doi:10.7717/peerj.8444)
Supplement: Supplemental Information 5 [file peerj-08-8444-s014.xlsx]

## Sheet: trial video data S_attempts onl
Date	deploy_trap	Deployment	Trap #	Time	elapsed time	video counter	Species	Behaviour	final catch	Direction	Time (s)
2016-07-04	1	1	1	14:45:00	00:00:00	00:01:00	Lob	start
2016-07-04	1	1	1	14:57:57	00:12:57	00:13:57	Lob	S_attempt		B	5
2016-07-04	1	1	1	15:09:38	00:24:38	00:25:38	Lob	S_attempt		E	51
2016-07-04	1	1	1	15:18:44	00:33:44	00:34:44	Lob	exit		T	5
2016-07-04	1	1	1	15:21:23	00:36:23	00:02:00	Lob	S_attempt		E	205
2016-07-04	1	1	1	15:26:57	00:41:57	00:07:34	Lob	exit		B	2
2016-07-04	1	1	1	15:28:59	00:43:59	00:09:36	Lob	S_attempt		E	50
2016-07-04	1	1	1	15:35:32	00:50:32	00:16:09	Lob	S_attempt		E	26
2016-07-04	1	1	1	15:38:40	00:53:40	00:19:17	Lob	exit		B	1
2016-07-04	1	1	1	16:02:48	01:17:48	00:08:02	Lob	S_attempt		E	63
2016-07-04	1	1	1	16:11:14	01:26:14	00:16:28	Lob	S_attempt		E	49
2016-07-04	1	1	1	16:15:52	01:30:52	00:21:06	Lob	exit		B	1
2016-07-04	1	1	1	16:15:58	01:30:58	00:21:12	Lob	S_attempt		E	46
2016-07-04	1	1	1	16:18:50	01:33:50	00:24:04	Lob	exit		B	2
2016-07-04	1	1	1	17:03:10	02:18:10	00:33:01	Lob	S_attempt		E	28
2016-07-04	1	1	1	17:03:51	02:18:51	00:33:42	Lob	exit		E	1
2016-07-04	1	1	1	17:07:36	02:22:36	00:02:04	Lob	exit		B	2
2016-07-04	1	1	1	21:15:13	06:30:13	00:02:00	Lob	end	2
2016-07-06	2	3	1	09:17:00	00:00:00	00:01:00	Lob	start
2016-07-06	2	3	1	10:15:05	00:58:05	00:23:42	Lob	S_attempt		E	101
2016-07-06	2	3	1	11:42:48	02:25:48	00:05:16	Lob	exit		B	2
2016-07-06	2	3	1	11:59:53	02:42:53	00:22:21	Lob	S_attempt		E	28
2016-07-06	2	3	1	13:32:23	04:15:23	00:08:42	Lob	exit		B	3
2016-07-06	2	3	1	20:04:33	10:47:33	00:11:39	Lob	S_attempt		E	624
2016-07-06	2	3	1	20:42:33	11:25:33	00:14:16	Lob	exit		B	7
2016-07-06	2	3	1	20:50:22	11:33:22	00:22:05	Lob	S_attempt		B	1
2016-07-06	2	3	1	20:51:44	11:34:44	00:23:27	Lob	exit		B	1
2016-07-06	2	3	1	21:21:40	12:04:40	00:18:00	Lob	end	3
2016-07-07	3	4	1	09:25:00	00:00:00	00:01:00	Lob	start
2016-07-07	3	4	1	09:38:16	00:13:16	00:14:16	Lob	S_attempt		E	76
2016-07-07	3	4	1	09:39:36	00:14:36	00:15:36	Lob	exit		E	1
2016-07-07	3	4	1	09:55:53	00:30:53	00:31:53	Lob	S_attempt		E	156
2016-07-07	3	4	1	10:01:43	00:36:43	00:02:20	Lob	S_attempt		E	84
2016-07-07	3	4	1	10:22:39	00:57:39	00:23:16	Lob	S_attempt		E	136
2016-07-07	3	4	1	10:24:52	00:59:52	00:25:29	Lob	S_attempt		E	385
2016-07-07	3	4	1	10:51:13	01:26:13	00:16:27	Lob	S_attempt		E	68
2016-07-07	3	4	1	11:12:47	01:47:47	00:02:38	Lob	S_attempt		E	44
2016-07-07	3	4	1	11:14:44	01:49:44	00:04:35	Lob	exit		B	5
2016-07-07	3	4	1	12:05:30	02:40:30	00:19:58	Lob	S_attempt		E	13
2016-07-07	3	4	1	12:43:40	03:18:40	00:22:45	Lob	exit		B	3
2016-07-07	3	4	1	14:14:41	04:49:41	00:07:37	Lob	S_attempt		E	192
2016-07-07	3	4	1	16:16:33	06:51:33	00:23:20	Lob	S_attempt		E	190
2016-07-07	3	4	1	16:34:03	07:09:03	00:05:27	Lob	exit		E	1
2016-07-07	3	4	1	16:52:37	07:27:37	00:24:01	Lob	S_attempt		E	298
2016-07-07	3	4	1	17:00:19	07:35:19	00:31:43	Lob	exit		E	39
2016-07-07	3	4	1	20:17:44	10:52:44	00:16:50	Lob	S_attempt		E	37
2016-07-07	3	4	1	21:21:20	11:56:20	00:09:40	Lob	end	7
2016-07-18	4	5	1	16:34:00	00:00:00	00:21:52	Lob	start
2016-07-18	4	5	1	21:15:35	04:41:35	00:20:23	Lob	end	0
2016-07-19	5	6	1	19:25:00	00:00:00	00:16:30	Lob	start
2016-07-19	5	6	1	09:59:06	12:44:27	00:02:31	Lob	end	0
2016-08-08	6	7	1	14:41:00	00:00:00	00:01:00	Lob	start
2016-08-08	6	7	1	15:09:32	00:28:32	00:29:32	Lob	S_attempt		T	8
2016-08-08	6	7	1	15:13:12	00:32:12	00:33:12	Lob	exit		B	6
2016-08-08	6	7	1	15:13:33	00:32:33	00:33:33	Lob	S_attempt		B	3
2016-08-08	6	7	1	15:13:51	00:32:51	00:33:51	Lob	S_attempt		T	10
2016-08-08	6	7	1	15:14:28	00:33:28	00:34:28	Lob	exit		T	3
2016-08-08	6	7	1	15:14:40	00:33:40	00:34:40	Lob	exit		T	7
2016-08-08	6	7	1	15:16:12	00:35:12	00:00:49	Lob	S_attempt		B	10
2016-08-08	6	7	1	15:17:33	00:36:33	00:02:10	Lob	exit		T	1
2016-08-08	6	7	1	15:19:57	00:38:57	00:04:34	Lob	S_attempt		T	2
2016-08-08	6	7	1	15:20:16	00:39:16	00:04:53	Lob	S_attempt		T	6
2016-08-08	6	7	1	15:20:34	00:39:34	00:05:11	Lob	exit		B	1
2016-08-08	6	7	1	15:22:54	00:41:54	00:07:31	Lob	exit		B	3
2016-08-08	6	7	1	15:29:52	00:48:52	00:14:29	Lob	S_attempt		E	349
2016-08-08	6	7	1	15:30:18	00:49:18	00:14:55	Lob	S_attempt		T	9
2016-08-08	6	7	1	15:31:11	00:50:11	00:15:48	Lob	exit		T	2
2016-08-08	6	7	1	15:38:06	00:57:06	00:22:43	Lob	S_attempt		B	4
2016-08-08	6	7	1	15:40:40	00:59:40	00:25:17	Lob	exit		B	1
2016-08-08	6	7	1	15:43:01	01:02:01	00:27:38	Lob	S_attempt		B	2
2016-08-08	6	7	1	15:47:41	01:06:41	00:32:18	Lob	exit		B	3
2016-08-08	6	7	1	15:48:12	01:07:12	00:32:49	Lob	exit		E	1
2016-08-08	6	7	1	15:51:00	01:10:00	00:00:14	Lob	S_attempt		B	4
2016-08-08	6	7	1	15:52:20	01:11:20	00:01:34	Lob	S_attempt		T	3
2016-08-08	6	7	1	15:52:41	01:11:41	00:01:55	Lob	exit		B	5
2016-08-08	6	7	1	15:54:26	01:13:26	00:03:40	Lob	exit		B	1
2016-08-08	6	7	1	16:00:57	01:19:57	00:10:11	Lob	S_attempt		B	5
2016-08-08	6	7	1	16:01:30	01:20:30	00:10:44	Lob	exit		B	1
2016-08-08	6	7	1	16:03:00	01:22:00	00:12:14	Lob	S_attempt		B	6
2016-08-08	6	7	1	16:05:31	01:24:31	00:14:45	Lob	exit		B	1
2016-08-08	6	7	1	16:06:01	01:25:01	00:15:15	Lob	S_attempt		B	3
2016-08-08	6	7	1	16:07:25	01:26:25	00:16:39	Lob	exit		T	2
2016-08-08	6	7	1	16:12:09	01:31:09	00:21:23	Lob	S_attempt		T	1
2016-08-08	6	7	1	16:12:17	01:31:17	00:21:31	Lob	exit		T	1
2016-08-08	6	7	1	16:15:11	01:34:11	00:24:25	Lob	S_attempt		B	20
2016-08-08	6	7	1	16:16:14	01:35:14	00:25:28	Lob	exit		B	2
2016-08-08	6	7	1	16:23:09	01:42:09	00:32:23	Lob	S_attempt		T	6
2016-08-08	6	7	1	16:23:18	01:42:18	00:32:32	Lob	exit		T	2
2016-08-08	6	7	1	16:29:12	01:48:12	00:03:03	Lob	S_attempt		B	4
2016-08-08	6	7	1	16:30:51	01:49:51	00:04:42	Lob	exit		B	7
2016-08-08	6	7	1	16:35:05	01:54:05	00:08:56	Lob	S_attempt		E	37
2016-08-08	6	7	1	16:35:05	01:54:05	00:08:56	Lob	S_attempt		B	5
2016-08-08	6	7	1	16:35:31	01:54:31	00:09:22	Lob	exit		B	2
2016-08-08	6	7	1	16:35:50	01:54:50	00:09:41	Lob	exit		E	194
2016-08-08	6	7	1	16:40:28	01:59:28	00:14:19	Lob	S_attempt		B	6
2016-08-08	6	7	1	16:40:38	01:59:38	00:14:29	Lob	exit		B	2
2016-08-08	6	7	1	16:49:29	02:08:29	00:23:20	Lob	S_attempt		E	24
2016-08-08	6	7	1	16:57:56	02:16:56	00:31:47	Lob	S_attempt		K	1
2016-08-08	6	7	1	16:58:09	02:17:09	00:32:00	Lob	exit		T	1
2016-08-08	6	7	1	17:15:18	02:34:18	00:13:46	Lob	exit		B	5
2016-08-08	6	7	1	17:16:32	02:35:32	00:15:00	Lob	S_attempt		B	6
2016-08-08	6	7	1	17:21:17	02:40:17	00:19:45	Lob	exit		T	1
2016-08-08	6	7	1	17:23:53	02:42:53	00:22:21	Lob	S_attempt		B	2
2016-08-08	6	7	1	17:25:12	02:44:12	00:23:40	Lob	exit		T	5
2016-08-08	6	7	1	17:25:46	02:44:46	00:24:14	Lob	S_attempt		T	5
2016-08-08	6	7	1	17:27:11	02:46:11	00:25:39	Lob	exit		B	4
2016-08-08	6	7	1	17:29:50	02:48:50	00:28:18	Lob	S_attempt		E	41
2016-08-08	6	7	1	17:30:35	02:49:35	00:29:03	Lob	exit		B	1
2016-08-08	6	7	1	17:31:13	02:50:13	00:29:41	Lob	S_attempt		B	3
2016-08-08	6	7	1	17:32:40	02:51:40	00:31:08	Lob	exit		B	3
2016-08-08	6	7	1	17:35:21	02:54:21	00:33:49	Lob	S_attempt		B	3
2016-08-08	6	7	1	17:37:31	02:56:31	00:00:36	Lob	S_attempt		E	17
2016-08-08	6	7	1	17:39:39	02:58:39	00:02:44	Lob	exit		B	2
2016-08-08	6	7	1	17:44:23	03:03:23	00:07:28	Lob	S_attempt		B	7
2016-08-08	6	7	1	17:47:05	03:06:05	00:10:10	Lob	exit		T	1
2016-08-08	6	7	1	17:47:24	03:06:24	00:10:29	Lob	S_attempt		T	3
2016-08-08	6	7	1	17:47:42	03:06:42	00:10:47	Lob	S_attempt		E	19
2016-08-08	6	7	1	17:48:02	03:07:02	00:11:07	Lob	exit		E	1
2016-08-08	6	7	1	17:51:34	03:10:34	00:14:39	Lob	S_attempt		T	5
2016-08-08	6	7	1	17:55:19	03:14:19	00:18:24	Lob	S_attempt		E	28
2016-08-08	6	7	1	17:55:51	03:14:51	00:18:56	Lob	S_attempt		E	101
2016-08-08	6	7	1	17:56:27	03:15:27	00:19:32	Lob	S_attempt		B	4
2016-08-08	6	7	1	17:56:28	03:15:28	00:19:33	Lob	exit		B	1
2016-08-08	6	7	1	17:56:40	03:15:40	00:19:45	Lob	exit		B	2
2016-08-08	6	7	1	17:58:36	03:17:36	00:21:41	Lob	exit		T	2
2016-08-08	6	7	1	17:58:47	03:17:47	00:21:52	Lob	S_attempt		B	13
2016-08-08	6	7	1	17:59:23	03:18:23	00:22:28	Lob	exit		B	2
2016-08-08	6	7	1	17:59:26	03:18:26	00:22:31	Lob	S_attempt		B	6
2016-08-08	6	7	1	18:00:05	03:19:05	00:23:10	Lob	exit		B	2
2016-08-08	6	7	1	18:01:31	03:20:31	00:24:36	Lob	exit		P	1
2016-08-08	6	7	1	18:04:44	03:23:44	00:27:49	Lob	S_attempt		T	3
2016-08-08	6	7	1	18:05:01	03:24:01	00:28:06	Lob	S_attempt		T	2
2016-08-08	6	7	1	18:05:38	03:24:38	00:28:43	Lob	exit		B	2
2016-08-08	6	7	1	18:06:01	03:25:01	00:29:06	Lob	S_attempt		B	7
2016-08-08	6	7	1	18:06:09	03:25:09	00:29:14	Lob	exit		K	1
2016-08-08	6	7	1	18:06:23	03:25:23	00:29:28	Lob	exit		B	3
2016-08-08	6	7	1	18:07:08	03:26:08	00:30:13	Lob	S_attempt		E	12
2016-08-08	6	7	1	18:08:20	03:27:20	00:31:25	Lob	S_attempt		B	8
2016-08-08	6	7	1	18:08:56	03:27:56	00:32:01	Lob	exit		B	2
2016-08-08	6	7	1	18:10:30	03:29:30	00:33:35	Lob	S_attempt		T	7
2016-08-08	6	7	1	18:10:47	03:29:47	00:33:52	Lob	S_attempt		B	5
2016-08-08	6	7	1	18:11:09	03:30:09	00:34:14	Lob	exit		B	2
2016-08-08	6	7	1	18:11:49	03:30:49	00:34:54	Lob	exit		T	3
2016-08-08	6	7	1	18:12:46	03:31:46	00:00:28	Lob	S_attempt		B	1
2016-08-08	6	7	1	18:13:09	03:32:09	00:00:51	Lob	exit		T	2
2016-08-08	6	7	1	18:17:50	03:36:50	00:05:32	Lob	S_attempt		T	10
2016-08-08	6	7	1	18:18:12	03:37:12	00:05:54	Lob	exit		T	2
2016-08-08	6	7	1	18:19:01	03:38:01	00:06:43	Lob	S_attempt		T	10
2016-08-08	6	7	1	18:20:22	03:39:22	00:08:04	Lob	exit		T	1
2016-08-08	6	7	1	18:21:44	03:40:44	00:09:26	Lob	S_attempt		T	5
2016-08-08	6	7	1	18:22:04	03:41:04	00:09:46	Lob	exit		T	4
2016-08-08	6	7	1	18:26:25	03:45:25	00:14:07	Lob	S_attempt		E	105
2016-08-08	6	7	1	18:39:06	03:58:06	00:26:48	Lob	exit		B	3
2016-08-08	6	7	1	18:53:47	04:12:47	00:06:06	Lob	S_attempt		T	2
2016-08-08	6	7	1	18:54:15	04:13:15	00:06:34	Lob	exit		T	4
2016-08-08	6	7	1	19:00:21	04:19:21	00:12:40	Lob	S_attempt		B	5
2016-08-08	6	7	1	19:02:53	04:21:53	00:15:12	Lob	exit		B	2
2016-08-08	6	7	1	19:04:22	04:23:22	00:16:41	Lob	exit		B	4
2016-08-08	6	7	1	19:10:07	04:29:07	00:22:26	Lob	S_attempt		B	4
2016-08-08	6	7	1	19:11:16	04:30:16	00:23:35	Lob	S_attempt		E	121
2016-08-08	6	7	1	19:11:46	04:30:46	00:24:05	Lob	exit		P	1
2016-08-08	6	7	1	19:19:42	04:38:42	00:32:01	Lob	exit		B	2
2016-08-08	6	7	1	19:25:10	04:44:10	00:02:06	Lob	S_attempt		T	3
2016-08-08	6	7	1	19:26:00	04:45:00	00:02:56	Lob	exit		B	7
2016-08-08	6	7	1	19:35:44	04:54:44	00:12:40	Lob	exit		B	2
2016-08-08	6	7	1	19:38:26	04:57:26	00:15:22	Lob	S_attempt		T	3
2016-08-08	6	7	1	19:41:28	05:00:28	00:18:24	Lob	S_attempt		T	10
2016-08-08	6	7	1	19:42:03	05:01:03	00:18:59	Lob	exit		K	1
2016-08-08	6	7	1	19:45:25	05:04:25	00:22:21	Lob	S_attempt		T	8
2016-08-08	6	7	1	19:47:54	05:06:54	00:24:50	Lob	exit		T	6
2016-08-08	6	7	1	19:55:39	05:14:39	00:32:35	Lob	S_attempt		E	38
2016-08-08	6	7	1	19:59:52	05:18:52	00:01:25	Lob	S_attempt		B	4
2016-08-08	6	7	1	20:03:47	05:22:47	00:05:20	Lob	exit		B	3
2016-08-08	6	7	1	20:08:20	05:27:20	00:09:53	Lob	S_attempt		B	9
2016-08-08	6	7	1	20:08:35	05:27:35	00:10:08	Lob	exit		B	1
2016-08-08	6	7	1	20:28:58	05:47:58	00:30:31	Lob	S_attempt		B	3
2016-08-08	6	7	1	20:29:32	05:48:32	00:31:05	Lob	S_attempt		E	9
2016-08-08	6	7	1	20:29:50	05:48:50	00:31:23	Lob	exit		K	3
2016-08-08	6	7	1	20:30:52	05:49:52	00:32:25	Lob	exit		B	3
2016-08-08	6	7	1	20:30:51	05:49:51	00:32:24	Lob	S_attempt		T	9
2016-08-08	6	7	1	20:32:50	05:51:50	00:34:23	Lob	exit		T	1
2016-08-08	6	7	1	20:40:41	05:59:41	00:06:51	Lob	S_attempt		B	3
2016-08-08	6	7	1	20:41:07	06:00:07	00:07:17	Lob	exit		B	1
2016-08-08	6	7	1	20:43:15	06:02:15	00:09:25	Lob	end	0
2016-08-09	7	8	1	09:24:00	00:00:00	00:01:00	Lob	start
2016-08-09	7	8	1	09:54:41	00:30:41	00:31:41	Lob	S_attempt		E	39
2016-08-09	7	8	1	09:58:52	00:34:52	00:00:29	Lob	exit		T	3
2016-08-09	7	8	1	10:01:09	00:37:09	00:02:46	Lob	S_attempt		B	13
2016-08-09	7	8	1	10:01:24	00:37:24	00:03:01	Lob	exit		B	1
2016-08-09	7	8	1	10:03:55	00:39:55	00:05:32	Lob	S_attempt		E	14
2016-08-09	7	8	1	10:04:21	00:40:21	00:05:58	Lob	S_attempt		T	8
2016-08-09	7	8	1	10:05:02	00:41:02	00:06:39	Lob	exit		B	1
2016-08-09	7	8	1	10:05:25	00:41:25	00:07:02	Lob	S_attempt		B	12
2016-08-09	7	8	1	10:05:40	00:41:40	00:07:17	Lob	exit		B	1
2016-08-09	7	8	1	10:07:42	00:43:42	00:09:19	Lob	S_attempt		B	3
2016-08-09	7	8	1	10:07:54	00:43:54	00:09:31	Lob	exit		B	1
2016-08-09	7	8	1	10:12:18	00:48:18	00:13:55	Lob	S_attempt		T	3
2016-08-09	7	8	1	10:12:55	00:48:55	00:14:32	Lob	exit		T	2
2016-08-09	7	8	1	10:33:50	01:09:50	00:00:04	Lob	S_attempt		B	6
2016-08-09	7	8	1	10:34:04	01:10:04	00:00:18	Lob	exit		B	1
2016-08-09	7	8	1	10:37:11	01:13:11	00:03:25	Lob	S_attempt		B	2
2016-08-09	7	8	1	10:37:39	01:13:39	00:03:53	Lob	exit		B	1
2016-08-09	7	8	1	11:02:16	01:38:16	00:28:30	Lob	S_attempt		E	39
2016-08-09	7	8	1	11:31:32	02:07:32	00:22:23	Lob	S_attempt		T	7
2016-08-09	7	8	1	11:31:56	02:07:56	00:22:47	Lob	exit		T	3
2016-08-09	7	8	1	12:26:32	03:02:32	00:06:37	Lob	S_attempt		E	67
2016-08-09	7	8	1	12:34:30	03:10:30	00:14:35	Lob	S_attempt		K	2
2016-08-09	7	8	1	12:34:55	03:10:55	00:15:00	Lob	exit		T	1
2016-08-09	7	8	1	13:51:10	04:27:10	00:20:29	Lob	S_attempt		B	2
2016-08-09	7	8	1	13:51:44	04:27:44	00:21:03	Lob	exit		T	2
2016-08-09	7	8	1	14:08:29	04:44:29	00:02:25	Lob	S_attempt		B	7
2016-08-09	7	8	1	14:09:15	04:45:15	00:03:11	Lob	exit		T	2
2016-08-09	7	8	1	15:16:43	05:52:43	00:35:16	Lob	S_attempt		B	4
2016-08-09	7	8	1	15:17:08	05:53:08	00:00:18	Lob	exit		B	2
2016-08-09	7	8	1	17:49:21	08:25:21	00:10:59	Lob	S_attempt		E	9
2016-08-09	7	8	1	20:49:17	11:25:17	00:14:00	Lob	end	4
2016-08-10	8	9	1	09:45:00	00:00:00	00:00:50	Lob	start
2016-08-10	8	9	1	09:52:10	00:07:10	00:08:00	Lob	S_attempt		E	16
2016-08-10	8	9	1	09:59:21	00:14:21	00:15:11	Lob	S_attempt		T	3
2016-08-10	8	9	1	09:59:49	00:14:49	00:15:39	Lob	exit		T	1
2016-08-10	8	9	1	10:21:50	00:36:50	00:02:17	Lob	S_attempt		E	37
2016-08-10	8	9	1	10:38:02	00:53:02	00:18:29	Lob	S_attempt		E	305
2016-08-10	8	9	1	10:56:31	01:11:31	00:01:35	Lob	S_attempt		B	8
2016-08-10	8	9	1	10:56:46	01:11:46	00:01:50	Lob	exit		B	1
2016-08-10	8	9	1	10:58:01	01:13:01	00:03:05	Lob	S_attempt		B	6
2016-08-10	8	9	1	10:59:38	01:14:38	00:04:42	Lob	exit		B	1
2016-08-10	8	9	1	10:59:49	01:14:49	00:04:53	Lob	S_attempt		B	5
2016-08-10	8	9	1	11:00:10	01:15:10	00:05:14	Lob	exit		K	1
2016-08-10	8	9	1	11:24:27	01:39:27	00:29:31	Lob	S_attempt		B	11
2016-08-10	8	9	1	11:24:52	01:39:52	00:29:56	Lob	exit		B	1
2016-08-10	8	9	1	11:28:44	01:43:44	00:33:48	Lob	S_attempt		E	124
2016-08-10	8	9	1	13:17:20	03:32:20	00:00:52	Lob	S_attempt		T	4
2016-08-10	8	9	1	13:17:49	03:32:49	00:01:21	Lob	exit		T	1
2016-08-10	8	9	1	13:23:15	03:38:15	00:06:47	Lob	S_attempt		T	10
2016-08-10	8	9	1	13:24:05	03:39:05	00:07:37	Lob	exit		K	1
2016-08-10	8	9	1	13:39:22	03:54:22	00:22:54	Lob	S_attempt		E	68
2016-08-10	8	9	1	13:41:13	03:56:13	00:24:45	Lob	exit		E	1
2016-08-10	8	9	1	13:54:38	04:09:38	00:02:47	Lob	S_attempt		B	5
2016-08-10	8	9	1	13:55:05	04:10:05	00:03:14	Lob	exit		B	13
2016-08-10	8	9	1	13:55:21	04:10:21	00:03:30	Lob	S_attempt		B	15
2016-08-10	8	9	1	13:56:27	04:11:27	00:04:36	Lob	exit		T	1
2016-08-10	8	9	1	13:58:18	04:13:18	00:06:27	Lob	S_attempt		T	3
2016-08-10	8	9	1	13:58:54	04:13:54	00:07:03	Lob	exit		B	2
2016-08-10	8	9	1	15:12:20	05:27:20	00:09:43	Lob	S_attempt		B	30
2016-08-10	8	9	1	15:14:06	05:29:06	00:11:29	Lob	exit		T	1
2016-08-10	8	9	1	15:17:38	05:32:38	00:15:01	Lob	S_attempt		B	38
2016-08-10	8	9	1	15:18:23	05:33:23	00:15:46	Lob	exit		B	2
2016-08-10	8	9	1	15:21:06	05:36:06	00:18:29	Lob	S_attempt		E	145
2016-08-10	8	9	1	15:44:34	05:59:34	00:06:34	Lob	S_attempt		B	6
2016-08-10	8	9	1	15:44:55	05:59:55	00:06:55	Lob	exit		K	1
2016-08-10	8	9	1	15:47:18	06:02:18	00:09:18	Lob	S_attempt		B	12
2016-08-10	8	9	1	15:48:08	06:03:08	00:10:08	Lob	exit		B	1
2016-08-10	8	9	1	15:48:53	06:03:53	00:10:53	Lob	S_attempt		B	15
2016-08-10	8	9	1	15:49:15	06:04:15	00:11:15	Lob	exit		B	5
2016-08-10	8	9	1	16:12:09	06:27:09	00:34:09	Lob	S_attempt		B	19
2016-08-10	8	9	1	16:13:15	06:28:15	00:35:15	Lob	exit		K	1
2016-08-10	8	9	1	16:15:29	06:30:29	00:02:06	Lob	S_attempt		B	6
2016-08-10	8	9	1	16:15:42	06:30:42	00:02:19	Lob	exit		B	1
2016-08-10	8	9	1	16:17:16	06:32:16	00:03:53	Lob	S_attempt		B	6
2016-08-10	8	9	1	16:17:26	06:32:26	00:04:03	Lob	exit		B	2
2016-08-10	8	9	1	16:19:50	06:34:50	00:06:27	Lob	S_attempt		B	12
2016-08-10	8	9	1	16:20:27	06:35:27	00:07:04	Lob	S_attempt		E	48
2016-08-10	8	9	1	16:21:09	06:36:09	00:07:46	Lob	exit		B	6
2016-08-10	8	9	1	16:29:21	06:44:21	00:15:58	Lob	S_attempt		B	3
2016-08-10	8	9	1	16:29:38	06:44:38	00:16:15	Lob	exit		B	1
2016-08-10	8	9	1	16:35:52	06:50:52	00:22:29	Lob	S_attempt		B	6
2016-08-10	8	9	1	16:36:07	06:51:07	00:22:44	Lob	exit		B	2
2016-08-10	8	9	1	16:44:20	06:59:20	00:30:57	Lob	S_attempt		B	61
2016-08-10	8	9	1	16:46:01	07:01:01	00:32:38	Lob	exit		K	1
2016-08-10	8	9	1	16:49:17	07:04:17	00:00:31	Lob	S_attempt		E	9
2016-08-10	8	9	1	16:49:27	07:04:27	00:00:41	Lob	exit		E	1
2016-08-10	8	9	1	16:49:42	07:04:42	00:00:56	Lob	S_attempt		E	65
2016-08-10	8	9	1	17:02:22	07:17:22	00:13:36	Lob	exit		B	1
2016-08-10	8	9	1	17:30:02	07:45:02	00:05:53	Lob	S_attempt		B	4
2016-08-10	8	9	1	17:31:21	07:46:21	00:07:12	Lob	exit		T	1
2016-08-10	8	9	1	18:48:10	09:03:10	00:13:15	Lob	S_attempt		B	8
2016-08-10	8	9	1	18:48:29	09:03:29	00:13:34	Lob	exit		B	2
2016-08-10	8	9	1	18:48:46	09:03:46	00:13:51	Lob	S_attempt		B	6
2016-08-10	8	9	1	18:49:50	09:04:50	00:14:55	Lob	exit		B	1
2016-08-10	8	9	1	18:51:11	09:06:11	00:16:16	Lob	S_attempt		B	18
2016-08-10	8	9	1	18:51:47	09:06:47	00:16:52	Lob	exit		B	1
2016-08-10	8	9	1	18:54:17	09:09:17	00:19:22	Lob	S_attempt		E	60
2016-08-10	8	9	1	19:19:52	09:34:52	00:09:34	Lob	S_attempt		B	77
2016-08-10	8	9	1	19:20:39	09:35:39	00:10:21	Lob	S_attempt		T	5
2016-08-10	8	9	1	19:20:52	09:35:52	00:10:34	Lob	exit		T	4
2016-08-10	8	9	1	19:30:03	09:45:03	00:19:45	Lob	S_attempt		B	2
2016-08-10	8	9	1	19:30:40	09:45:40	00:20:22	Lob	exit		B	1
2016-08-10	8	9	1	19:33:07	09:48:07	00:22:49	Lob	S_attempt		B	9
2016-08-10	8	9	1	19:33:19	09:48:19	00:23:01	Lob	exit		B	1
2016-08-10	8	9	1	19:37:52	09:52:52	00:27:34	Lob	S_attempt		B	7
2016-08-10	8	9	1	19:38:15	09:53:15	00:27:57	Lob	exit		B	1
2016-08-10	8	9	1	19:50:39	10:05:39	00:04:58	Lob	S_attempt		B	9
2016-08-10	8	9	1	19:51:36	10:06:36	00:05:55	Lob	exit		B	3
2016-08-10	8	9	1	19:53:20	10:08:20	00:07:39	Lob	S_attempt		B	10
2016-08-10	8	9	1	19:53:38	10:08:38	00:07:57	Lob	exit		B	2
2016-08-10	8	9	1	19:56:39	10:11:39	00:10:58	Lob	S_attempt		B	5
2016-08-10	8	9	1	19:57:13	10:12:13	00:11:32	Lob	exit		B	2
2016-08-10	8	9	1	20:16:21	10:31:21	00:30:40	Lob	S_attempt		B	9
2016-08-10	8	9	1	20:16:56	10:31:56	00:31:15	Lob	exit		B	1
2016-08-10	8	9	1	20:17:39	10:32:39	00:31:58	Lob	S_attempt		B	41
2016-08-10	8	9	1	20:18:27	10:33:27	00:32:46	Lob	exit		B	1
2016-08-10	8	9	1	20:26:21	10:40:21	00:05:17	Lob	S_attempt		B	3
2016-08-10	8	9	1	20:26:33	10:40:33	00:05:29	Lob	exit		B	7
2016-08-10	8	9	1	20:35:20	10:49:20	00:14:16	Lob	S_attempt		B	14
2016-08-10	8	9	1	20:35:56	10:49:56	00:14:52	Lob	exit		B	1
2016-08-10	8	9	1	20:44:04	10:58:04	00:23:00	Lob	end	4
2016-08-11	9	10	1	09:13:00	00:00:00	00:00:30		start
2016-08-11	9	10	1	09:18:21	00:05:21	00:05:51	Lob	S_attempt		B	8
2016-08-11	9	10	1	09:20:15	00:07:15	00:07:45	Lob	exit		T	3
2016-08-11	9	10	1	09:22:01	00:09:01	00:09:31	Lob	S_attempt		T	2
2016-08-11	9	10	1	09:22:36	00:09:36	00:10:06	Lob	exit		T	3
2016-08-11	9	10	1	09:32:13	00:19:13	00:19:43	Lob	S_attempt		B	23
2016-08-11	9	10	1	09:35:48	00:22:48	00:23:18	Lob	exit		B	2
2016-08-11	9	10	1	09:49:45	00:36:45	00:01:52	Lob	S_attempt		E	15
2016-08-11	9	10	1	09:53:36	00:40:36	00:05:43	Lob	S_attempt		B	5
2016-08-11	9	10	1	09:57:02	00:44:02	00:09:09	Lob	exit		B	3
2016-08-11	9	10	1	10:27:17	01:14:17	00:04:01	Lob	S_attempt		E	214
2016-08-11	9	10	1	10:37:41	01:24:41	00:14:25	Lob	exit		B	6
2016-08-11	9	10	1	10:49:52	01:36:52	00:26:36	Lob	S_attempt		T	13
2016-08-11	9	10	1	10:50:35	01:37:35	00:27:19	Lob	exit		T	3
2016-08-11	9	10	1	11:02:52	01:49:52	00:04:13	Lob	exit		B	7
2016-08-11	9	10	1	11:16:29	02:03:29	00:17:50	Lob	S_attempt		T	5
2016-08-11	9	10	1	11:19:38	02:06:38	00:20:59	Lob	exit		T	2
2016-08-11	9	10	1	12:40:54	03:27:54	00:31:29	Lob	S_attempt		E	397
2016-08-11	9	10	1	13:14:44	04:01:44	00:29:56	Lob	S_attempt		B	6
2016-08-11	9	10	1	13:15:07	04:02:07	00:30:19	Lob	exit		T	1
2016-08-11	9	10	1	13:19:45	04:06:45	00:34:57	Lob	S_attempt		B	15
2016-08-11	9	10	1	13:20:15	04:07:15	00:00:04	Lob	exit		B	3
2016-08-11	9	10	1	13:32:11	04:19:11	00:12:00	Lob	S_attempt		B	9
2016-08-11	9	10	1	13:32:27	04:19:27	00:12:16	Lob	exit		B	4
2016-08-11	9	10	1	15:38:38	06:25:38	00:32:18	Lob	S_attempt		B	56
2016-08-11	9	10	1	15:40:18	06:27:18	00:33:58	Lob	exit		B	2
2016-08-11	9	10	1	15:49:02	06:36:02	00:07:19	Lob	S_attempt		B	6
2016-08-11	9	10	1	15:49:25	06:36:25	00:07:42	Lob	exit		B	2
2016-08-11	9	10	1	15:49:53	06:36:53	00:08:10	Lob	S_attempt		T	7
2016-08-11	9	10	1	15:50:21	06:37:21	00:08:38	Lob	S_attempt		B	7
2016-08-11	9	10	1	15:50:45	06:37:45	00:09:02	Lob	exit		T	2
2016-08-11	9	10	1	15:54:18	06:41:18	00:12:35	Lob	exit		B	4
2016-08-11	9	10	1	16:07:43	06:54:43	00:26:00	Lob	S_attempt		B	9
2016-08-11	9	10	1	16:09:34	06:56:34	00:27:51	Lob	exit		T	2
2016-08-11	9	10	1	16:11:12	06:58:12	00:29:29	Lob	S_attempt		B	5
2016-08-11	9	10	1	16:12:36	06:59:36	00:30:53	Lob	exit		B	2
2016-08-11	9	10	1	16:13:18	07:00:18	00:31:35	Lob	S_attempt		B	10
2016-08-11	9	10	1	16:16:23	07:03:23	00:34:40	Lob	exit		B	4
2016-08-11	9	10	1	16:16:52	07:03:52	00:35:09	Lob	S_attempt		T	10
2016-08-11	9	10	1	16:17:48	07:04:48	00:00:42	Lob	S_attempt		B	12
2016-08-11	9	10	1	16:20:08	07:07:08	00:03:02	Lob	exit		B	12
2016-08-11	9	10	1	16:24:53	07:11:53	00:07:47	Lob	exit		T	3
2016-08-11	9	10	1	16:38:49	07:25:49	00:21:43	Lob	S_attempt		T	9
2016-08-11	9	10	1	16:39:58	07:26:58	00:22:52	Lob	exit		T	1
2016-08-11	9	10	1	17:33:46	08:20:46	00:05:54	Lob	exit		B	3
2016-08-11	9	10	1	18:00:16	08:47:16	00:32:24	Lob	S_attempt		T	9
2016-08-11	9	10	1	18:02:13	08:49:13	00:34:21	Lob	exit		T	3
2016-08-11	9	10	1	18:03:27	08:50:27	00:00:12	Lob	S_attempt		T	9
2016-08-11	9	10	1	18:03:46	08:50:46	00:00:31	Lob	exit		T	3
2016-08-11	9	10	1	18:05:38	08:52:38	00:02:23	Lob	S_attempt		T	6
2016-08-11	9	10	1	18:08:13	08:55:13	00:04:58	Lob	exit		T	1
2016-08-11	9	10	1	18:13:48	09:00:48	00:10:33	Lob	S_attempt		T	8
2016-08-11	9	10	1	18:25:09	09:12:09	00:21:54	Lob	exit		T	5
2016-08-11	9	10	1	18:34:59	09:21:59	00:31:44	Lob	S_attempt		T	9
2016-08-11	9	10	1	18:35:50	09:22:50	00:32:35	Lob	exit		T	1
2016-08-11	9	10	1	18:36:00	09:23:00	00:32:45	Lob	S_attempt		T	11
2016-08-11	9	10	1	18:36:45	09:23:45	00:33:30	Lob	exit		T	3
2016-08-11	9	10	1	18:53:00	09:40:00	00:14:22	Lob	S_attempt		E	213
2016-08-11	9	10	1	20:03:17	10:50:17	00:13:53	Lob	S_attempt		T	3
2016-08-11	9	10	1	20:03:39	10:50:39	00:14:15	Lob	exit		T	3
2016-08-11	9	10	1	20:09:57	10:56:57	00:20:33	Lob	S_attempt		K	8
2016-08-11	9	10	1	20:13:12	11:00:12	00:23:48	Lob	exit		T	2
2016-08-11	9	10	1	20:30:10	11:17:10	00:05:23		end	7
2016-08-22	10	11	1	14:50:00	00:00:00	00:02:00	Lob	start
2016-08-22	10	11	1	15:12:07	00:22:07	00:24:07	Lob	S_attempt		B	5
2016-08-22	10	11	1	15:14:42	00:24:42	00:26:42	Lob	exit		B	1
2016-08-22	10	11	1	15:22:11	00:32:11	00:34:11	Lob	S_attempt		B	4
2016-08-22	10	11	1	15:24:09	00:34:09	00:00:46	Lob	exit		B	1
2016-08-22	10	11	1	15:26:09	00:36:09	00:02:46	Lob	S_attempt		E	92
2016-08-22	10	11	1	15:31:49	00:41:49	00:08:26	Lob	exit		B	3
2016-08-22	10	11	1	15:33:50	00:43:50	00:10:27	Lob	S_attempt		B	4
2016-08-22	10	11	1	15:35:11	00:45:11	00:11:48	Lob	exit		B	1
2016-08-22	10	11	1	15:36:21	00:46:21	00:12:58	Lob	S_attempt		B	6
2016-08-22	10	11	1	15:36:56	00:46:56	00:13:33	Lob	exit		B	2
2016-08-22	10	11	1	15:37:11	00:47:11	00:13:48	Lob	S_attempt		B	2
2016-08-22	10	11	1	15:39:04	00:49:04	00:15:41	Lob	exit		B	1
2016-08-22	10	11	1	15:39:34	00:49:34	00:16:11	Lob	S_attempt		B	5
2016-08-22	10	11	1	15:40:49	00:50:49	00:17:26	Lob	exit		B	3
2016-08-22	10	11	1	15:44:43	00:54:43	00:21:20	Lob	S_attempt		T	4
2016-08-22	10	11	1	15:44:49	00:54:49	00:21:26	Lob	exit		T	1
2016-08-22	10	11	1	15:45:25	00:55:25	00:22:02	Lob	S_attempt		B	7
2016-08-22	10	11	1	15:48:38	00:58:38	00:25:15	Lob	exit		E	1
2016-08-22	10	11	1	15:56:24	01:06:24	00:33:01	Lob	S_attempt		B	3
2016-08-22	10	11	1	15:56:37	01:06:37	00:33:14	Lob	S_attempt		T	4
2016-08-22	10	11	1	15:56:58	01:06:58	00:33:35	Lob	exit		E	1
2016-08-22	10	11	1	15:59:19	01:09:19	00:00:33	Lob	exit		B	1
2016-08-22	10	11	1	15:59:43	01:09:43	00:00:57	Lob	S_attempt		E	99
2016-08-22	10	11	1	16:12:02	01:22:02	00:13:16	Lob	S_attempt		B	5
2016-08-22	10	11	1	16:12:19	01:22:19	00:13:33	Lob	exit		E	1
2016-08-22	10	11	1	16:13:11	01:23:11	00:14:25	Lob	exit		B	2
2016-08-22	10	11	1	16:18:58	01:28:58	00:20:12	Lob	S_attempt		T	3
2016-08-22	10	11	1	16:21:53	01:31:53	00:23:07	Lob	exit		T	3
2016-08-22	10	11	1	16:22:06	01:32:06	00:23:20	Lob	S_attempt		T	4
2016-08-22	10	11	1	16:22:18	01:32:18	00:23:32	Lob	exit		B	2
2016-08-22	10	11	1	16:23:42	01:33:42	00:24:56	Lob	S_attempt		T	3
2016-08-22	10	11	1	16:24:16	01:34:16	00:25:30	Lob	exit		B	1
2016-08-22	10	11	1	16:36:31	01:46:31	00:02:22	Lob	S_attempt		T	3
2016-08-22	10	11	1	16:38:08	01:48:08	00:03:59	Lob	exit		T	1
2016-08-22	10	11	1	16:42:59	01:52:59	00:08:50	Lob	S_attempt		T	7
2016-08-22	10	11	1	16:48:00	01:58:00	00:13:51	Lob	exit		P	1
2016-08-22	10	11	1	16:50:16	02:00:16	00:16:07	Lob	S_attempt		B	4
2016-08-22	10	11	1	16:50:50	02:00:50	00:16:41	Lob	exit		B	1
2016-08-22	10	11	1	17:09:28	02:19:28	00:35:19	Lob	S_attempt		E	327
2016-08-22	10	11	1	17:34:27	02:44:27	00:24:55	Lob	S_attempt		E	194
2016-08-22	10	11	1	17:47:04	02:57:04	00:02:09	Lob	exit		B	2
2016-08-22	10	11	1	18:01:14	03:11:14	00:16:19	Lob	S_attempt		E	343
2016-08-22	10	11	1	18:41:44	03:51:44	00:21:26	Lob	S_attempt		E	195
2016-08-22	10	11	1	19:03:34	04:13:34	00:07:53	Lob	exit		B	26
2016-08-22	10	11	1	19:12:54	04:22:54	00:17:13	Lob	S_attempt		E	75
2016-08-22	10	11	1	19:14:15	04:24:15	00:18:34	Lob	exit		E	4
2016-08-22	10	11	1	19:30:14	04:40:14	00:34:33	Lob	S_attempt		B	6
2016-08-22	10	11	1	19:30:23	04:40:23	00:34:42	Lob	exit		B	1
2016-08-22	10	11	1	20:01:21	05:11:21	00:30:17	Lob	S_attempt		E	363
2016-08-22	10	11	1	20:17:00	05:27:00	00:10:33	Lob	end	6
2016-08-23	11	12	1	09:17:00	00:00:00	00:01:00	Lob	start
2016-08-23	11	12	1	09:20:01	00:03:01	00:04:01	Lob	S_attempt		E	41
2016-08-23	11	12	1	09:25:13	00:08:13	00:09:13	Lob	S_attempt		T	1
2016-08-23	11	12	1	09:28:23	00:11:23	00:12:23	Lob	S_attempt		T	8
2016-08-23	11	12	1	09:28:47	00:11:47	00:12:47	Lob	exit		T	6
2016-08-23	11	12	1	09:29:36	00:12:36	00:13:36	Lob	S_attempt		T	5
2016-08-23	11	12	1	09:29:58	00:12:58	00:13:58	Lob	exit		B	2
2016-08-23	11	12	1	09:34:39	00:17:39	00:18:39	Lob	exit		P	6
2016-08-23	11	12	1	09:39:02	00:22:02	00:23:02	Lob	S_attempt		E	69
2016-08-23	11	12	1	09:40:58	00:23:58	00:24:58	Lob	S_attempt		B	5
2016-08-23	11	12	1	09:41:51	00:24:51	00:25:51	Lob	exit		B	2
2016-08-23	11	12	1	09:43:37	00:26:37	00:27:37	Lob	exit		T	2
2016-08-23	11	12	1	09:47:16	00:30:16	00:31:16	Lob	S_attempt		T	4
2016-08-23	11	12	1	09:47:37	00:30:37	00:31:37	Lob	exit		T	1
2016-08-23	11	12	1	09:50:14	00:33:14	00:34:14	Lob	S_attempt		E	267
2016-08-23	11	12	1	10:08:57	00:51:57	00:17:34	Lob	S_attempt		E	161
2016-08-23	11	12	1	10:22:27	01:05:27	00:31:04	Lob	S_attempt		E	18
2016-08-23	11	12	1	10:27:41	01:10:41	00:00:55	Lob	exit		B	4
2016-08-23	11	12	1	11:50:19	02:33:19	00:12:47	Lob	S_attempt		E	13
2016-08-23	11	12	1	12:09:13	02:52:13	00:31:41	Lob	S_attempt		E	53
2016-08-23	11	12	1	12:10:54	02:53:54	00:33:22	Lob	exit		T	2
2016-08-23	11	12	1	12:17:01	03:00:01	00:04:06	Lob	S_attempt		E	84
2016-08-23	11	12	1	12:18:27	03:01:27	00:05:32	Lob	exit		E	1
2016-08-23	11	12	1	12:26:48	03:09:48	00:13:53	Lob	S_attempt		E	212
2016-08-23	11	12	1	12:51:24	03:34:24	00:03:06	Lob	exit		B	1
2016-08-23	11	12	1	13:51:10	04:34:10	00:27:29	Lob	S_attempt		T	4
2016-08-23	11	12	1	13:51:36	04:34:36	00:27:55	Lob	exit		T	34
2016-08-23	11	12	1	13:54:05	04:37:05	00:30:24	Lob	S_attempt		E	305
2016-08-23	11	12	1	14:48:16	05:31:16	00:13:49	Lob	S_attempt		E	504
2016-08-23	11	12	1	14:50:11	05:33:11	00:15:44	Lob	S_attempt		B	14
2016-08-23	11	12	1	14:50:49	05:33:49	00:16:22	Lob	exit		K	2
2016-08-23	11	12	1	15:50:07	06:33:07	00:04:54	Lob	S_attempt		T	12
2016-08-23	11	12	1	15:51:18	06:34:18	00:06:05	Lob	exit		T	3
2016-08-23	11	12	1	15:51:53	06:34:53	00:06:40	Lob	S_attempt		T	11
2016-08-23	11	12	1	15:52:30	06:35:30	00:07:17	Lob	exit		T	2
2016-08-23	11	12	1	15:56:55	06:39:55	00:11:42	Lob	S_attempt		T	16
2016-08-23	11	12	1	15:58:04	06:41:04	00:12:51	Lob	exit		T	2
2016-08-23	11	12	1	16:08:58	06:51:58	00:23:45	Lob	S_attempt		T	7
2016-08-23	11	12	1	16:35:57	07:18:57	00:15:21	Lob	S_attempt		B	2
2016-08-23	11	12	1	16:36:52	07:19:52	00:16:16	Lob	S_attempt		B	3
2016-08-23	11	12	1	16:37:09	07:20:09	00:16:33	Lob	exit		B	2
2016-08-23	11	12	1	16:38:22	07:21:22	00:17:46	Lob	exit		K	1
2016-08-23	11	12	1	16:49:20	07:32:20	00:28:44	Lob	S_attempt		E	227
2016-08-23	11	12	1	17:33:57	08:16:57	00:02:35	Lob	S_attempt		E	47
2016-08-23	11	12	1	18:11:04	08:54:04	00:04:19	Lob	S_attempt		T	6
2016-08-23	11	12	1	18:11:58	08:54:58	00:05:13	Lob	exit		B	1
2016-08-23	11	12	1	18:12:29	08:55:29	00:05:44	Lob	S_attempt		B	4
2016-08-23	11	12	1	18:14:17	08:57:17	00:07:32	Lob	exit		B	1
2016-08-23	11	12	1	18:37:32	09:20:32	00:30:47	Lob	S_attempt		T	2
2016-08-23	11	12	1	18:38:03	09:21:03	00:31:18	Lob	exit		T	2
2016-08-23	11	12	1	19:50:50	10:33:50	00:33:19	Lob	S_attempt		T	5
2016-08-23	11	12	1	19:51:00	10:34:00	00:33:29	Lob	exit		T	2
2016-08-23	11	12	1	20:15:54	10:58:54	00:23:00	Lob	end	5
2016-08-24	12	13	1	09:30:00	00:00:00	00:01:00	Lob	start
2016-08-24	12	13	1	09:44:21	00:14:21	00:15:21	Lob	S_attempt		T	5
2016-08-24	12	13	1	09:44:34	00:14:34	00:15:34	Lob	exit		K	1
2016-08-24	12	13	1	09:46:29	00:16:29	00:17:29	Lob	S_attempt		T	2
2016-08-24	12	13	1	09:49:38	00:19:38	00:20:38	Lob	exit		T	1
2016-08-24	12	13	1	09:50:09	00:20:09	00:21:09	Lob	S_attempt		T	1
2016-08-24	12	13	1	09:51:30	00:21:30	00:22:30	Lob	exit		T	1
2016-08-24	12	13	1	09:54:04	00:24:04	00:25:04	Lob	S_attempt		B	5
2016-08-24	12	13	1	09:55:10	00:25:10	00:26:10	Lob	exit		T	1
2016-08-24	12	13	1	09:59:56	00:29:56	00:30:56	Lob	S_attempt		T	6
2016-08-24	12	13	1	10:00:12	00:30:12	00:31:12	Lob	S_attempt		T	16
2016-08-24	12	13	1	10:00:45	00:30:45	00:31:45	Lob	exit		B	1
2016-08-24	12	13	1	10:00:49	00:30:49	00:31:49	Lob	S_attempt		T	4
2016-08-24	12	13	1	10:01:27	00:31:27	00:32:27	Lob	exit		T	2
2016-08-24	12	13	1	10:02:48	00:32:48	00:33:48	Lob	S_attempt		T	2
2016-08-24	12	13	1	10:03:01	00:33:01	00:34:01	Lob	exit		T	2
2016-08-24	12	13	1	10:03:50	00:33:50	00:34:50	Lob	exit		P	1
2016-08-24	12	13	1	10:05:36	00:35:36	00:01:13	Lob	S_attempt		T	3
2016-08-24	12	13	1	10:08:25	00:38:25	00:04:02	Lob	exit		B	1
2016-08-24	12	13	1	10:09:10	00:39:10	00:04:47	Lob	S_attempt		T	1
2016-08-24	12	13	1	10:10:17	00:40:17	00:05:54	Lob	exit		T	1
2016-08-24	12	13	1	10:18:03	00:48:03	00:13:40	Lob	S_attempt		B	6
2016-08-24	12	13	1	10:20:29	00:50:29	00:16:06	Lob	exit		P	1
2016-08-24	12	13	1	10:20:31	00:50:31	00:16:08	Lob	S_attempt		B	8
2016-08-24	12	13	1	10:20:57	00:50:57	00:16:34	Lob	exit		E	1
2016-08-24	12	13	1	10:24:30	00:54:30	00:20:07	Lob	S_attempt		E	12
2016-08-24	12	13	1	10:24:45	00:54:45	00:20:22	Lob	S_attempt		E	14
2016-08-24	12	13	1	10:25:29	00:55:29	00:21:06	Lob	exit		T	1
2016-08-24	12	13	1	10:29:08	00:59:08	00:24:45	Lob	exit		B	1
2016-08-24	12	13	1	10:29:23	00:59:23	00:25:00	Lob	S_attempt		B	5
2016-08-24	12	13	1	10:29:49	00:59:49	00:25:26	Lob	exit		B	4
2016-08-24	12	13	1	10:44:38	01:14:38	00:04:52	Lob	S_attempt		T	6
2016-08-24	12	13	1	10:44:51	01:14:51	00:05:05	Lob	exit		T	1
2016-08-24	12	13	1	10:50:36	01:20:36	00:10:50	Lob	S_attempt		B	4
2016-08-24	12	13	1	10:53:14	01:23:14	00:13:28	Lob	S_attempt		T	5
2016-08-24	12	13	1	10:53:40	01:23:40	00:13:54	Lob	exit		T	1
2016-08-24	12	13	1	11:30:28	02:00:28	00:15:19	Lob	exit		B	6
2016-08-24	12	13	1	11:44:12	02:14:12	00:29:03	Lob	S_attempt		T	3
2016-08-24	12	13	1	11:45:41	02:15:41	00:30:32	Lob	exit		T	4
2016-08-24	12	13	1	11:57:22	02:27:22	00:06:50	Lob	S_attempt		B	9
2016-08-24	12	13	1	11:58:11	02:28:11	00:07:39	Lob	exit		B	1
2016-08-24	12	13	1	12:15:54	02:45:54	00:25:22	Lob	S_attempt		B	10
2016-08-24	12	13	1	12:16:32	02:46:32	00:26:00	Lob	exit		B	1
2016-08-24	12	13	1	12:44:19	03:14:19	00:18:24	Lob	S_attempt		B	3
2016-08-24	12	13	1	12:45:04	03:15:04	00:19:09	Lob	exit		T	1
2016-08-24	12	13	1	12:45:35	03:15:35	00:19:40	Lob	S_attempt		T	4
2016-08-24	12	13	1	12:46:47	03:16:47	00:20:52	Lob	exit		B	1
2016-08-24	12	13	1	13:07:49	03:37:49	00:06:31	Lob	S_attempt		E	62
2016-08-24	12	13	1	13:18:48	03:48:48	00:17:30	Lob	S_attempt		B	4
2016-08-24	12	13	1	13:20:31	03:50:31	00:19:13	Lob	exit		T	2
2016-08-24	12	13	1	13:26:50	03:56:50	00:25:32	Lob	S_attempt		T	2
2016-08-24	12	13	1	13:30:03	04:00:03	00:28:45	Lob	exit		T	1
2016-08-24	12	13	1	13:58:52	04:28:52	00:22:11	Lob	S_attempt		B	3
2016-08-24	12	13	1	13:59:33	04:29:33	00:22:52	Lob	exit		T	1
2016-08-24	12	13	1	14:04:35	04:34:35	00:27:54	Lob	S_attempt		B	4
2016-08-24	12	13	1	14:04:58	04:34:58	00:28:17	Lob	exit		T	1
2016-08-24	12	13	1	14:43:48	05:13:48	00:31:44	Lob	S_attempt		E	257
2016-08-24	12	13	1	15:57:00	06:27:00	00:34:10	Lob	S_attempt		B	11
2016-08-24	12	13	1	15:57:14	06:27:14	00:34:24	Lob	exit		B	2
2016-08-24	12	13	1	16:03:26	06:33:26	00:05:13	Lob	S_attempt		B	4
2016-08-24	12	13	1	16:03:37	06:33:37	00:05:24	Lob	exit		B	1
2016-08-24	12	13	1	16:08:46	06:38:46	00:10:33	Lob	S_attempt		B	10
2016-08-24	12	13	1	16:10:53	06:40:53	00:12:40	Lob	exit		B	1
2016-08-24	12	13	1	16:16:01	06:46:01	00:17:48	Lob	S_attempt		B	6
2016-08-24	12	13	1	16:24:21	06:54:21	00:26:08	Lob	exit		T	1
2016-08-24	12	13	1	16:30:20	07:00:20	00:32:07	Lob	S_attempt		T	4
2016-08-24	12	13	1	16:45:47	07:15:47	00:12:11	Lob	S_attempt		B	1
2016-08-24	12	13	1	16:36:53	07:06:53	00:03:17	Lob	S_attempt		B	9
2016-08-24	12	13	1	16:38:14	07:08:14	00:04:38	Lob	exit		T	3
2016-08-24	12	13	1	16:44:52	07:14:52	00:11:16	Lob	exit		B	1
2016-08-24	12	13	1	16:48:10	07:18:10	00:14:34	Lob	S_attempt		T	2
2016-08-24	12	13	1	16:48:38	07:18:38	00:15:02	Lob	exit		B	1
2016-08-24	12	13	1	17:15:59	07:45:59	00:07:00	Lob	S_attempt		B	6
2016-08-24	12	13	1	17:17:30	07:47:30	00:08:31	Lob	exit		B	1
2016-08-24	12	13	1	17:39:26	08:09:26	00:30:27	Lob	S_attempt		B	7
2016-08-24	12	13	1	17:40:35	08:10:35	00:31:36	Lob	exit		B	1
2016-08-24	12	13	1	17:42:17	08:12:17	00:33:18	Lob	S_attempt		B	6
2016-08-24	12	13	1	17:43:47	08:13:47	00:34:48	Lob	exit		B	1
2016-08-24	12	13	1	17:46:26	08:16:26	00:02:04	Lob	S_attempt		B	6
2016-08-24	12	13	1	17:46:42	08:16:42	00:02:20	Lob	exit		B	1
2016-08-24	12	13	1	17:47:09	08:17:09	00:02:47	Lob	S_attempt		B	5
2016-08-24	12	13	1	17:47:31	08:17:31	00:03:09	Lob	exit		B	2
2016-08-24	12	13	1	17:54:22	08:24:22	00:10:00	Lob	S_attempt		T	2
2016-08-24	12	13	1	17:56:05	08:26:05	00:11:43	Lob	S_attempt		B	5
2016-08-24	12	13	1	17:56:09	08:26:09	00:11:47	Lob	exit		P	1
2016-08-24	12	13	1	17:59:47	08:29:47	00:15:25	Lob	exit		E	7
2016-08-24	12	13	1	18:00:08	08:30:08	00:15:46	Lob	exit		B	65
2016-08-24	12	13	1	18:01:48	08:31:48	00:17:26	Lob	S_attempt		B	2
2016-08-24	12	13	1	18:08:33	08:38:33	00:24:11	Lob	exit		B	3
2016-08-24	12	13	1	18:09:11	08:39:11	00:24:49	Lob	S_attempt		B	3
2016-08-24	12	13	1	18:16:27	08:46:27	00:32:05	Lob	exit		B	1
2016-08-24	12	13	1	18:30:02	09:00:02	00:10:17	Lob	S_attempt		B	2
2016-08-24	12	13	1	18:32:59	09:02:59	00:13:14	Lob	exit		B	4
2016-08-24	12	13	1	18:44:55	09:14:55	00:25:10	Lob	S_attempt		B	2
2016-08-24	12	13	1	18:47:25	09:17:25	00:27:40	Lob	exit		B	3
2016-08-24	12	13	1	19:03:49	09:33:49	00:08:41	Lob	S_attempt		B	13
2016-08-24	12	13	1	19:04:13	09:34:13	00:09:05	Lob	exit		K	1
2016-08-24	12	13	1	19:11:22	09:41:22	00:16:14	Lob	S_attempt		T	9
2016-08-24	12	13	1	19:28:24	09:58:24	00:33:16	Lob	S_attempt		B	10
2016-08-24	12	13	1	19:29:05	09:59:05	00:33:57	Lob	exit		B	1
2016-08-24	12	13	1	20:00:23	10:30:23	00:29:52	Lob	S_attempt		B	4
2016-08-24	12	13	1	20:00:38	10:30:38	00:30:07	Lob	exit		B	1
2016-08-24	12	13	1	20:05:54	10:35:54	00:35:23	Lob	end	2
2016-08-25	13	14	1	08:56:00	00:00:00	00:01:00	Lob	start
2016-08-25	13	14	1	08:58:55	00:02:55	00:03:55	Lob	S_attempt		T	4
2016-08-25	13	14	1	08:59:45	00:03:45	00:04:45	Lob	exit		T	2
2016-08-25	13	14	1	09:06:25	00:10:25	00:11:25	Lob	S_attempt		B	5
2016-08-25	13	14	1	09:06:38	00:10:38	00:11:38	Lob	exit		B	1
2016-08-25	13	14	1	09:06:49	00:10:49	00:11:49	Lob	S_attempt		T	4
2016-08-25	13	14	1	09:07:03	00:11:03	00:12:03	Lob	exit		T	1
2016-08-25	13	14	1	09:07:04	00:11:04	00:12:04	Lob	S_attempt		B	4
2016-08-25	13	14	1	09:07:19	00:11:19	00:12:19	Lob	S_attempt		T	5
2016-08-25	13	14	1	09:08:27	00:12:27	00:13:27	Lob	S_attempt		P	7
2016-08-25	13	14	1	09:08:53	00:12:53	00:13:53	Lob	exit		T	4
2016-08-25	13	14	1	09:11:45	00:15:45	00:16:45	Lob	exit		T	1
2016-08-25	13	14	1	09:12:01	00:16:01	00:17:01	Lob	exit		P	1
2016-08-25	13	14	1	09:18:25	00:22:25	00:23:25	Lob	S_attempt		T	10
2016-08-25	13	14	1	09:19:46	00:23:46	00:24:46	Lob	exit		P	5
2016-08-25	13	14	1	09:31:05	00:35:05	00:00:42	Lob	S_attempt		T	2
2016-08-25	13	14	1	09:34:14	00:38:14	00:03:51	Lob	exit		T	1
2016-08-25	13	14	1	09:39:23	00:43:23	00:09:00	Lob	S_attempt		T	5
2016-08-25	13	14	1	09:40:06	00:44:06	00:09:43	Lob	exit		T	1
2016-08-25	13	14	1	09:51:07	00:55:07	00:20:44	Lob	S_attempt		B	7
2016-08-25	13	14	1	09:52:53	00:56:53	00:22:30	Lob	exit		T	1
2016-08-25	13	14	1	09:53:10	00:57:10	00:22:47	Lob	S_attempt		T	14
2016-08-25	13	14	1	09:56:02	01:00:02	00:25:39	Lob	S_attempt		B	9
2016-08-25	13	14	1	09:56:40	01:00:40	00:26:17	Lob	exit		B	1
2016-08-25	13	14	1	09:56:49	01:00:49	00:26:26	Lob	S_attempt		B	7
2016-08-25	13	14	1	09:57:44	01:01:44	00:27:21	Lob	exit		B	1
2016-08-25	13	14	1	09:58:03	01:02:03	00:27:40	Lob	S_attempt		E	47
2016-08-25	13	14	1	09:59:00	01:03:00	00:28:37	Lob	exit		T	1
2016-08-25	13	14	1	10:07:15	01:11:15	00:01:29	Lob	S_attempt		B	4
2016-08-25	13	14	1	10:08:13	01:12:13	00:02:27	Lob	S_attempt		B	27
2016-08-25	13	14	1	10:09:42	01:13:42	00:03:56	Lob	exit		B	1
2016-08-25	13	14	1	10:11:48	01:15:48	00:06:02	Lob	exit		T	1
2016-08-25	13	14	1	10:18:19	01:22:19	00:12:33	Lob	S_attempt		B	11
2016-08-25	13	14	1	10:20:15	01:24:15	00:14:29	Lob	exit		B	1
2016-08-25	13	14	1	10:24:25	01:28:25	00:18:39	Lob	S_attempt		T	4
2016-08-25	13	14	1	10:27:48	01:31:48	00:22:02	Lob	exit		B	1
2016-08-25	13	14	1	10:34:12	01:38:12	00:28:26	Lob	S_attempt		B	3
2016-08-25	13	14	1	10:35:17	01:39:17	00:29:31	Lob	exit		B	7
2016-08-25	13	14	1	10:49:37	01:53:37	00:08:28	Lob	S_attempt		B	7
2016-08-25	13	14	1	10:49:59	01:53:59	00:08:50	Lob	exit		T	1
2016-08-25	13	14	1	10:50:18	01:54:18	00:09:09	Lob	S_attempt		T	1
2016-08-25	13	14	1	10:51:24	01:55:24	00:10:15	Lob	exit		T	1
2016-08-25	13	14	1	10:52:23	01:56:23	00:11:14	Lob	S_attempt		T	5
2016-08-25	13	14	1	10:52:57	01:56:57	00:11:48	Lob	exit		P	1
2016-08-25	13	14	1	11:02:05	02:06:05	00:20:56	Lob	S_attempt		T	2
2016-08-25	13	14	1	11:02:35	02:06:35	00:21:26	Lob	exit		B	1
2016-08-25	13	14	1	11:28:21	02:32:21	00:11:49	Lob	S_attempt		T	7
2016-08-25	13	14	1	11:28:29	02:32:29	00:11:57	Lob	exit		T	1
2016-08-25	13	14	1	11:35:43	02:39:43	00:19:11	Lob	S_attempt		B	10
2016-08-25	13	14	1	11:35:55	02:39:55	00:19:23	Lob	exit		B	1
2016-08-25	13	14	1	12:17:55	03:21:55	00:26:00	Lob	S_attempt		B	2
2016-08-25	13	14	1	12:19:31	03:23:31	00:27:36	Lob	exit		T	1
2016-08-25	13	14	1	12:22:51	03:26:51	00:30:56	Lob	S_attempt		B	1
2016-08-25	13	14	1	12:23:44	03:27:44	00:31:49	Lob	S_attempt		B	1
2016-08-25	13	14	1	12:24:05	03:28:05	00:32:10	Lob	exit		B	1
2016-08-25	13	14	1	12:24:40	03:28:40	00:32:45	Lob	exit		B	1
2016-08-25	13	14	1	12:25:04	03:29:04	00:33:09	Lob	S_attempt		B	1
2016-08-25	13	14	1	12:25:19	03:29:19	00:33:24	Lob	exit		B	1
2016-08-25	13	14	1	12:31:23	03:35:23	00:04:05	Lob	S_attempt		E	54
2016-08-25	13	14	1	12:35:57	03:39:57	00:08:39	Lob	S_attempt		T	13
2016-08-25	13	14	1	12:38:12	03:42:12	00:10:54	Lob	exit		B	1
2016-08-25	13	14	1	12:39:56	03:43:56	00:12:38	Lob	exit		B	4
2016-08-25	13	14	1	12:43:29	03:47:29	00:16:11	Lob	S_attempt		B	4
2016-08-25	13	14	1	12:44:20	03:48:20	00:17:02	Lob	exit		B	1
2016-08-25	13	14	1	12:48:52	03:52:52	00:21:34	Lob	S_attempt		B	6
2016-08-25	13	14	1	12:49:08	03:53:08	00:21:50	Lob	exit		B	5
2016-08-25	13	14	1	12:49:22	03:53:22	00:22:04	Lob	S_attempt		B	6
2016-08-25	13	14	1	12:50:16	03:54:16	00:22:58	Lob	exit		B	1
2016-08-25	13	14	1	12:50:44	03:54:44	00:23:26	Lob	S_attempt		B	4
2016-08-25	13	14	1	12:50:52	03:54:52	00:23:34	Lob	exit		B	3
2016-08-25	13	14	1	13:40:04	04:44:04	00:02:00	Lob	S_attempt		E	21
2016-08-25	13	14	1	13:49:58	04:53:58	00:11:54	Lob	exit		B	1
2016-08-25	13	14	1	13:59:44	05:03:44	00:21:40	Lob	S_attempt		B	2
2016-08-25	13	14	1	13:59:48	05:03:48	00:21:44	Lob	exit		B	1
2016-08-25	13	14	1	14:02:28	05:06:28	00:24:24	Lob	S_attempt		E	30
2016-08-25	13	14	1	14:02:35	05:06:35	00:24:31	Lob	S_attempt		B	6
2016-08-25	13	14	1	14:02:48	05:06:48	00:24:44	Lob	exit		B	1
2016-08-25	13	14	1	14:10:48	05:14:48	00:32:44	Lob	S_attempt		T	3
2016-08-25	13	14	1	14:11:04	05:15:04	00:33:00	Lob	exit		T	1
2016-08-25	13	14	1	14:13:49	05:17:49	00:00:22	Lob	S_attempt		T	5
2016-08-25	13	14	1	14:13:57	05:17:57	00:00:30	Lob	exit		T	1
2016-08-25	13	14	1	14:16:41	05:20:41	00:03:14	Lob	S_attempt		T	3
2016-08-25	13	14	1	14:17:25	05:21:25	00:03:58	Lob	exit		T	1
2016-08-25	13	14	1	14:22:58	05:26:58	00:09:31	Lob	S_attempt		T	6
2016-08-25	13	14	1	14:23:24	05:27:24	00:09:57	Lob	exit		T	1
2016-08-25	13	14	1	14:31:59	05:35:59	00:18:32	Lob	S_attempt		T	2
2016-08-25	13	14	1	14:32:41	05:36:41	00:19:14	Lob	exit		K	1
2016-08-25	13	14	1	14:37:37	05:41:37	00:24:10	Lob	S_attempt		T	2
2016-08-25	13	14	1	14:38:24	05:42:24	00:24:57	Lob	exit		T	1
2016-08-25	13	14	1	15:28:22	06:22:22	00:29:32	Lob	S_attempt		T	12
2016-08-25	13	14	1	15:42:52	06:36:52	00:08:39	Lob	exit		B	1
2016-08-25	13	14	1	15:51:55	06:45:55	00:17:42	Lob	S_attempt		B	15
2016-08-25	13	14	1	15:52:50	06:46:50	00:18:37	Lob	exit		B	1
2016-08-25	13	14	1	15:59:49	06:53:49	00:25:36	Lob	S_attempt		B	11
2016-08-25	13	14	1	16:22:20	07:16:20	00:12:44	Lob	S_attempt		T	19
2016-08-25	13	14	1	16:22:43	07:16:43	00:13:07	Lob	exit		T	1
2016-08-25	13	14	1	16:26:55	07:20:55	00:17:19	Lob	S_attempt		B	12
2016-08-25	13	14	1	16:27:14	07:21:14	00:17:38	Lob	exit		T	1
2016-08-25	13	14	1	16:27:54	07:21:54	00:18:18	Lob	exit		T	1
2016-08-25	13	14	1	16:36:05	07:30:05	00:26:29	Lob	S_attempt		B	21
2016-08-25	13	14	1	16:37:43	07:31:43	00:28:07	Lob	exit		B	1
2016-08-25	13	14	1	16:39:06	07:33:06	00:29:30	Lob	S_attempt		T	11
2016-08-25	13	14	1	16:39:50	07:33:50	00:30:14	Lob	exit		P	1
2016-08-25	13	14	1	16:46:24	07:40:24	00:01:25	Lob	S_attempt		T	7
2016-08-25	13	14	1	16:48:02	07:42:02	00:03:03	Lob	S_attempt		B	19
2016-08-25	13	14	1	16:48:37	07:42:37	00:03:38	Lob	exit		B	9
2016-08-25	13	14	1	16:49:06	07:43:06	00:04:07	Lob	S_attempt		B	18
2016-08-25	13	14	1	16:51:01	07:45:01	00:06:02	Lob	exit		B	1
2016-08-25	13	14	1	16:53:18	07:47:18	00:08:19	Lob	S_attempt		B	9
2016-08-25	13	14	1	16:54:39	07:48:39	00:09:40	Lob	exit		T	1
2016-08-25	13	14	1	16:55:11	07:49:11	00:10:12	Lob	S_attempt		T	12
2016-08-25	13	14	1	16:55:22	07:49:22	00:10:23	Lob	exit		B	1
2016-08-25	13	14	1	16:55:55	07:49:55	00:10:56	Lob	S_attempt		B	12
2016-08-25	13	14	1	16:56:54	07:50:54	00:11:55	Lob	exit		B	1
2016-08-25	13	14	1	16:58:17	07:52:17	00:13:18	Lob	S_attempt		B	5
2016-08-25	13	14	1	16:58:22	07:52:22	00:13:23	Lob	exit		B	1
2016-08-25	13	14	1	16:58:58	07:52:58	00:13:59	Lob	exit		B	1
2016-08-25	13	14	1	17:22:15	08:16:15	00:01:53	Lob	S_attempt		T	15
2016-08-25	13	14	1	17:23:47	08:17:47	00:03:25	Lob	S_attempt		T	21
2016-08-25	13	14	1	17:24:17	08:18:17	00:03:55	Lob	exit		T	1
2016-08-25	13	14	1	17:31:34	08:25:34	00:11:12	Lob	exit		T	1
2016-08-25	13	14	1	17:57:03	08:51:03	00:01:18	Lob	S_attempt		B	11
2016-08-25	13	14	1	18:02:59	08:56:59	00:07:14	Lob	S_attempt		T	7
2016-08-25	13	14	1	18:07:30	09:01:30	00:11:45	Lob	exit		B	1
2016-08-25	13	14	1	18:07:32	09:01:32	00:11:47	Lob	exit		T	4
2016-08-25	13	14	1	18:18:33	09:12:33	00:22:48	Lob	S_attempt		T	15
2016-08-25	13	14	1	18:21:49	09:15:49	00:26:04	Lob	S_attempt		T	6
2016-08-25	13	14	1	18:30:34	09:24:34	00:34:49	Lob	S_attempt		B	12
2016-08-25	13	14	1	18:43:44	09:37:44	00:12:36	Lob	S_attempt		B	6
2016-08-25	13	14	1	18:44:13	09:38:13	00:13:05	Lob	exit		B	1
2016-08-25	13	14	1	18:45:36	09:39:36	00:14:28	Lob	S_attempt		B	12
2016-08-25	13	14	1	18:45:57	09:39:57	00:14:49	Lob	exit		B	3
2016-08-25	13	14	1	18:46:36	09:40:36	00:15:28	Lob	S_attempt		B	5
2016-08-25	13	14	1	18:47:35	09:41:35	00:16:27	Lob	exit		B	2
2016-08-25	13	14	1	18:49:04	09:43:04	00:17:56	Lob	exit		K	2
2016-08-25	13	14	1	18:54:21	09:48:21	00:23:13	Lob	S_attempt		B	6
2016-08-25	13	14	1	18:55:39	09:49:39	00:24:31	Lob	exit		B	1
2016-08-25	13	14	1	19:05:57	09:59:57	00:34:49	Lob	S_attempt		B	15
2016-08-25	13	14	1	19:07:02	10:01:02	00:00:31	Lob	exit		T	2
2016-08-25	13	14	1	19:21:11	10:15:11	00:14:40	Lob	S_attempt		T	33
2016-08-25	13	14	1	19:22:10	10:16:10	00:15:39	Lob	exit		T	3
2016-08-25	13	14	1	19:23:04	10:17:04	00:16:33	Lob	S_attempt		B	6
2016-08-25	13	14	1	19:23:51	10:17:51	00:17:20	Lob	exit		B	21
2016-08-25	13	14	1	19:24:22	10:18:22	00:17:51	Lob	S_attempt		B	6
2016-08-25	13	14	1	19:25:30	10:19:30	00:18:59	Lob	exit		B	1
2016-08-25	13	14	1	19:37:17	10:31:17	00:30:46	Lob	S_attempt		B	18
2016-08-25	13	14	1	19:39:21	10:33:21	00:32:50	Lob	exit		T	2
2016-08-25	13	14	1	19:40:43	10:34:43	00:34:12	Lob	S_attempt		T	42
2016-08-25	13	14	1	19:41:41	10:35:41	00:35:10	Lob	S_attempt		T	9
2016-08-25	13	14	1	19:44:54	10:38:54	00:03:00	Lob	exit		T	7
2016-08-25	13	14	1	19:45:49	10:39:49	00:03:55	Lob	exit		T	1
2016-08-25	13	14	1	19:55:49	10:49:49	00:13:55	Lob	S_attempt		T	13
2016-08-25	13	14	1	19:58:37	10:52:37	00:16:43	Lob	exit		T	2
2016-08-25	13	14	1	19:58:51	10:52:51	00:16:57	Lob	S_attempt		T	7
2016-08-25	13	14	1	19:59:28	10:53:28	00:17:34	Lob	exit		K	2
2016-08-25	13	14	1	20:02:40	10:56:40	00:20:46	Lob	S_attempt		T	11
2016-08-25	13	14	1	20:03:10	10:57:10	00:21:16	Lob	exit		T	7
2016-08-25	13	14	1	20:05:21	10:59:21	00:23:27	Lob	S_attempt		T	6
2016-08-25	13	14	1	20:08:22	11:02:22	00:26:28	Lob	exit		T	1
2016-08-25	13	14	1	20:08:50	11:02:50	00:26:56	Lob	S_attempt		T	7
2016-08-25	13	14	1	20:09:44	11:03:44	00:27:50	Lob	S_attempt		T	10
2016-08-25	13	14	1	20:10:06	11:04:06	00:28:12	Lob	exit		T	1
2016-08-25	13	14	1	20:11:28	11:05:28	00:29:34	Lob	exit		T	2
2016-08-25	13	14	1	20:16:53	11:10:53	00:34:59	Lob	exit		B	1
2016-08-25	13	14	1	20:20:13	11:14:13	00:02:56	Lob	S_attempt		T	2
2016-08-25	13	14	1	20:20:26	11:14:26	00:03:09	Lob	exit		T	7
2016-08-25	13	14	1	20:21:17	11:15:17	00:04:00	Lob	end	4
2016-09-06	14	15	1	15:40:00	00:00:00	00:01:00	Lob	start
2016-09-06	14	15	1	15:43:30	00:03:30	00:04:30	Lob	S_attempt		T	1
2016-09-06	14	15	1	15:45:32	00:05:32	00:06:32	Lob	S_attempt		B	12
2016-09-06	14	15	1	15:45:53	00:05:53	00:06:53	Lob	exit		T	1
2016-09-06	14	15	1	15:46:01	00:06:01	00:07:01	Lob	exit		T	2
2016-09-06	14	15	1	15:48:41	00:08:41	00:09:41	Lob	S_attempt		B	3
2016-09-06	14	15	1	15:49:05	00:09:05	00:10:05	Lob	S_attempt		T	3
2016-09-06	14	15	1	15:49:13	00:09:13	00:10:13	Lob	exit		B	1
2016-09-06	14	15	1	16:05:28	00:25:28	00:26:28	Lob	exit		T	1
2016-09-06	14	15	1	16:06:06	00:26:06	00:27:06	Lob	S_attempt		B	4
2016-09-06	14	15	1	16:11:10	00:31:10	00:32:10	Lob	exit		T	1
2016-09-06	14	15	1	16:13:07	00:33:07	00:34:07	Lob	S_attempt		E	2
2016-09-06	14	15	1	16:13:55	00:33:55	00:34:55	Lob	S_attempt		B	1
2016-09-06	14	15	1	16:16:11	00:36:11	00:01:48	Lob	S_attempt		P	3
2016-09-06	14	15	1	16:19:42	00:39:42	00:05:19	Lob	exit		B	1
2016-09-06	14	15	1	16:25:39	00:45:39	00:11:16	Lob	S_attempt		B	3
2016-09-06	14	15	1	16:26:42	00:46:42	00:12:19	Lob	exit		T	1
2016-09-06	14	15	1	16:32:03	00:52:03	00:17:40	Lob	S_attempt		T	2
2016-09-06	14	15	1	16:32:18	00:52:18	00:17:55	Lob	exit		B	1
2016-09-06	14	15	1	16:32:59	00:52:59	00:18:36	Lob	S_attempt		B	3
2016-09-06	14	15	1	16:33:11	00:53:11	00:18:48	Lob	exit		B	6
2016-09-06	14	15	1	16:39:40	00:59:40	00:25:17	Lob	S_attempt		T	2
2016-09-06	14	15	1	16:39:49	00:59:49	00:25:26	Lob	exit		T	1
2016-09-06	14	15	1	16:39:59	00:59:59	00:25:36	Lob	S_attempt		B	5
2016-09-06	14	15	1	16:41:39	01:01:39	00:27:16	Lob	S_attempt		E	131
2016-09-06	14	15	1	16:44:18	01:04:18	00:29:55	Lob	S_attempt		E	125
2016-09-06	14	15	1	17:06:55	01:26:55	00:17:09	Lob	S_attempt		B	3
2016-09-06	14	15	1	17:08:03	01:28:03	00:18:17	Lob	exit		T	1
2016-09-06	14	15	1	17:16:33	01:36:33	00:26:47	Lob	S_attempt		T	4
2016-09-06	14	15	1	17:17:05	01:37:05	00:27:19	Lob	exit		B	2
2016-09-06	14	15	1	17:48:45	02:08:45	00:23:36	Lob	S_attempt		T	9
2016-09-06	14	15	1	17:53:22	02:13:22	00:28:13	Lob	exit		T	1
2016-09-06	14	15	1	18:06:55	02:26:55	00:06:23	Lob	S_attempt		T	9
2016-09-06	14	15	1	18:10:00	02:30:00	00:09:28	Lob	exit		K	2
2016-09-06	14	15	1	18:17:08	02:37:08	00:16:36	Lob	S_attempt		P	1
2016-09-06	14	15	1	18:18:12	02:38:12	00:17:40	Lob	exit		K	1
2016-09-06	14	15	1	18:25:40	02:45:40	00:25:08	Lob	S_attempt		P	3
2016-09-06	14	15	1	18:26:03	02:46:03	00:25:31	Lob	exit		B	1
2016-09-06	14	15	1	18:49:36	03:09:36	00:13:41	Lob	S_attempt		T	6
2016-09-06	14	15	1	18:50:06	03:10:06	00:14:11	Lob	exit		B	1
2016-09-06	14	15	1	19:02:41	03:22:41	00:26:46	Lob	S_attempt		T	2
2016-09-06	14	15	1	19:03:25	03:23:25	00:27:30	Lob	S_attempt		T	11
2016-09-06	14	15	1	19:03:43	03:23:43	00:27:48	Lob	exit		T	1
2016-09-06	14	15	1	19:05:46	03:25:46	00:29:51	Lob	exit		T	1
2016-09-06	14	15	1	19:06:35	03:26:35	00:30:40	Lob	end	4
2016-09-07	15	16	1	08:42:00	00:00:00	00:01:00	Lob	start
2016-09-07	15	16	1	09:14:58	00:32:58	00:33:58	Lob	S_attempt		B	2
2016-09-07	15	16	1	09:21:56	00:39:56	00:05:33	Lob	exit		B	1
2016-09-07	15	16	1	09:40:34	00:58:34	00:24:11	Lob	S_attempt		B	13
2016-09-07	15	16	1	09:48:07	01:06:07	00:31:44	Lob	exit		B	3
2016-09-07	15	16	1	10:06:40	01:24:40	00:14:54	Lob	S_attempt		T	34
2016-09-07	15	16	1	10:12:52	01:30:52	00:21:06	Lob	exit		P	12
2016-09-07	15	16	1	10:27:29	01:45:29	00:00:20	Lob	S_attempt		B	11
2016-09-07	15	16	1	10:27:50	01:45:50	00:00:41	Lob	exit		B	2
2016-09-07	15	16	1	10:56:03	02:14:03	00:28:54	Lob	S_attempt		E	18
2016-09-07	15	16	1	10:56:25	02:14:25	00:29:16	Lob	exit		E	1
2016-09-07	15	16	1	11:36:54	02:54:54	00:34:22	Lob	S_attempt		E	32
2016-09-07	15	16	1	11:51:47	03:09:47	00:13:52	Lob	S_attempt		T	10
2016-09-07	15	16	1	11:52:59	03:10:59	00:15:04	Lob	exit		T	2
2016-09-07	15	16	1	11:54:44	03:12:44	00:16:49	Lob	S_attempt		B	3
2016-09-07	15	16	1	11:54:55	03:12:55	00:17:00	Lob	exit		B	2
2016-09-07	15	16	1	12:01:01	03:19:01	00:23:06	Lob	S_attempt		B	9
2016-09-07	15	16	1	12:01:11	03:19:11	00:23:16	Lob	exit		B	1
2016-09-07	15	16	1	12:02:04	03:20:04	00:24:09	Lob	S_attempt		E	6
2016-09-07	15	16	1	12:02:11	03:20:11	00:24:16	Lob	exit		E	1
2016-09-07	15	16	1	12:05:58	03:23:58	00:28:03	Lob	S_attempt		T	3
2016-09-07	15	16	1	12:08:20	03:26:20	00:30:25	Lob	exit		T	2
2016-09-07	15	16	1	12:32:19	03:50:19	00:19:01	Lob	S_attempt		T	8
2016-09-07	15	16	1	12:34:35	03:52:35	00:21:17	Lob	exit		B	2
2016-09-07	15	16	1	12:57:21	04:15:21	00:08:40	Lob	S_attempt		T	6
2016-09-07	15	16	1	12:58:14	04:16:14	00:09:33	Lob	exit		T	1
2016-09-07	15	16	1	12:58:54	04:16:54	00:10:13	Lob	S_attempt		E	18
2016-09-07	15	16	1	13:06:19	04:24:19	00:17:38	Lob	S_attempt		T	15
2016-09-07	15	16	1	13:06:37	04:24:37	00:17:56	Lob	exit		T	6
2016-09-07	15	16	1	13:22:38	04:40:38	00:33:57	Lob	S_attempt		T	32
2016-09-07	15	16	1	13:35:23	04:53:23	00:11:19	Lob	S_attempt		E	113
2016-09-07	15	16	1	13:37:56	04:55:56	00:13:52	Lob	exit		T	1
2016-09-07	15	16	1	13:40:03	04:58:03	00:15:59	Lob	exit		E	1
2016-09-07	15	16	1	13:40:05	04:58:05	00:16:01	Lob	S_attempt		E	16
2016-09-07	15	16	1	13:51:07	05:09:07	00:27:03	Lob	S_attempt		E	29
2016-09-07	15	16	1	14:03:23	05:21:23	00:03:56	Lob	exit		B	23
2016-09-07	15	16	1	14:27:23	05:45:23	00:27:56	Lob	S_attempt		E	235
2016-09-07	15	16	1	14:44:50	06:02:50	00:10:00	Lob	S_attempt		T	6
2016-09-07	15	16	1	14:45:29	06:03:29	00:10:39	Lob	exit		B	2
2016-09-07	15	16	1	15:02:44	06:20:44	00:27:54	Lob	S_attempt		B	6
2016-09-07	15	16	1	15:04:54	06:22:54	00:30:04	Lob	exit		T	6
2016-09-07	15	16	1	15:55:11	07:13:11	00:09:35	Lob	S_attempt		B	18
2016-09-07	15	16	1	15:56:40	07:14:40	00:11:04	Lob	exit		B	3
2016-09-07	15	16	1	15:57:09	07:15:09	00:11:33	Lob	S_attempt		B	6
2016-09-07	15	16	1	15:57:42	07:15:42	00:12:06	Lob	exit		B	3
2016-09-07	15	16	1	15:58:54	07:16:54	00:13:18	Lob	S_attempt		K	6
2016-09-07	15	16	1	16:02:42	07:20:42	00:17:06	Lob	exit		B	1
2016-09-07	15	16	1	16:14:30	07:32:30	00:28:54	Lob	S_attempt		B	12
2016-09-07	15	16	1	16:15:42	07:33:42	00:30:06	Lob	exit		B	1
2016-09-07	15	16	1	16:24:20	07:42:20	00:03:21	Lob	S_attempt		T	3
2016-09-07	15	16	1	16:26:27	07:44:27	00:05:28	Lob	exit		T	3
2016-09-07	15	16	1	16:59:38	08:17:38	00:03:16	Lob	S_attempt		E	189
2016-09-07	15	16	1	17:25:47	08:43:47	00:29:25	Lob	S_attempt		B	2
2016-09-07	15	16	1	17:28:15	08:46:15	00:31:53	Lob	exit		T	1
2016-09-07	15	16	1	17:38:29	08:56:29	00:06:44	Lob	S_attempt		B	15
2016-09-07	15	16	1	17:40:08	08:58:08	00:08:23	Lob	exit		T	6
2016-09-07	15	16	1	18:06:46	09:24:46	00:35:01	Lob	S_attempt		B	22
2016-09-07	15	16	1	18:07:13	09:25:13	00:00:05	Lob	exit		B	2
2016-09-07	15	16	1	18:23:43	09:41:43	00:16:35	Lob	S_attempt		T	15
2016-09-07	15	16	1	18:31:50	09:49:50	00:24:42	Lob	exit		B	2
2016-09-07	15	16	1	18:35:19	09:53:19	00:28:11	Lob	S_attempt		T	6
2016-09-07	15	16	1	18:50:33	10:08:33	00:08:02	Lob	exit		T	1
2016-09-07	15	16	1	19:07:34	10:25:34	00:25:03	Lob	S_attempt		B	2
2016-09-07	15	16	1	19:20:13	10:38:13	00:02:19	Lob	S_attempt		T	3
2016-09-07	15	16	1	19:20:16	10:38:16	00:02:22	Lob	exit		T	11
2016-09-07	15	16	1	19:22:00	10:40:00	00:04:06	Lob	exit		B	3
2016-09-07	15	16	1	19:23:17	10:41:17	00:05:23	Lob	S_attempt		B	5
2016-09-07	15	16	1	19:26:56	10:44:56	00:09:02	Lob	S_attempt		T	6
2016-09-07	15	16	1	19:27:24	10:45:24	00:09:30	Lob	exit		T	1
2016-09-07	15	16	1	19:29:19	10:47:19	00:11:25	Lob	S_attempt		B	3
2016-09-07	15	16	1	19:29:54	10:47:54	00:12:00	Lob	exit		B	1
2016-09-07	15	16	1	19:37:21	10:55:21	00:19:27	Lob	S_attempt		T	2
2016-09-07	15	16	1	19:38:15	10:56:15	00:20:21	Lob	end	5
2016-09-08	16	17	1	10:05:48	00:00:00	00:25:48	Lob	start
2016-09-08	16	17	1	10:41:18	00:35:30	00:01:07	Lob	S_attempt		T	9
2016-09-08	16	17	1	11:05:25	00:59:37	00:25:14	Lob	S_attempt		E	31
2016-09-08	16	17	1	11:06:25	01:00:37	00:26:14	Lob	exit		E	2
2016-09-08	16	17	1	10:54:33	01:13:33	00:03:47	Lob	S_attempt		E	14
2016-09-08	16	17	1	11:43:59	02:02:59	00:17:50	Lob	S_attempt		E	14
2016-09-08	16	17	1	12:15:30	02:34:30	00:13:58	Lob	S_attempt		E	29
2016-09-08	16	17	1	12:30:45	02:49:45	00:29:13	Lob	S_attempt		E	28
2016-09-08	16	17	1	12:40:33	02:59:33	00:03:38	Lob	S_attempt		E	97
2016-09-08	16	17	1	13:25:05	03:44:05	00:12:47	Lob	S_attempt		E	28
2016-09-08	16	17	1	15:37:00	05:56:00	00:03:10	Lob	exit		B	19
2016-09-08	16	17	1	20:03:31	10:21:31	00:21:00	Lob	end	3
2016-07-04	17	1	2	14:50:00	00:00:00	00:01:30	Lob	start
2016-07-04	17	1	2	14:52:28	00:02:28	00:03:58	Lob	S_attempt		E	217
2016-07-04	17	1	2	15:02:11	00:12:11	00:13:41	Lob	S_attempt		T	19
2016-07-04	17	1	2	15:06:11	00:16:11	00:17:41	Lob	exit		B	1
2016-07-04	17	1	2	15:06:27	00:16:27	00:17:57	Lob	exit		P	2
2016-07-04	17	1	2	15:16:29	00:26:29	00:27:59	Lob	S_attempt		T	7
2016-07-04	17	1	2	15:24:12	00:34:12	00:00:19	Lob	S_attempt		T	4
2016-07-04	17	1	2	15:25:29	00:35:29	00:01:36	Lob	S_attempt		E	183
2016-07-04	17	1	2	15:28:02	00:38:02	00:04:09	Lob	exit		T	4
2016-07-04	17	1	2	15:30:50	00:40:50	00:06:57	Lob	exit		T	2
2016-07-04	17	1	2	15:32:40	00:42:40	00:08:47	Lob	S_attempt		T	5
2016-07-04	17	1	2	15:37:19	00:47:19	00:13:26	Lob	exit		T	2
2016-07-04	17	1	2	15:43:42	00:53:42	00:19:49	Lob	exit		T	2
2016-07-04	17	1	2	15:44:34	00:54:34	00:20:41	Lob	S_attempt		E	15
2016-07-04	17	1	2	15:44:48	00:54:48	00:20:55	Lob	exit		B	2
2016-07-04	17	1	2	15:45:22	00:55:22	00:21:29	Lob	S_attempt		E	63
2016-07-04	17	1	2	15:47:54	00:57:54	00:24:01	Lob	exit		T	2
2016-07-04	17	1	2	16:25:34	01:35:34	00:26:18	Lob	S_attempt		E	545
2016-07-04	17	1	2	16:38:13	01:48:13	00:03:34	Lob	exit		T	8
2016-07-04	17	1	2	16:44:56	01:54:56	00:10:17	Lob	S_attempt		E	197
2016-07-04	17	1	2	16:49:50	01:59:50	00:15:11	Lob	S_attempt		E	382
2016-07-04	17	1	2	16:54:09	02:04:09	00:19:30	Lob	exit		B	4
2016-07-04	17	1	2	17:30:55	02:40:55	00:20:53	Lob	S_attempt		E	62
2016-07-04	17	1	2	17:41:34	02:51:34	00:31:32	Lob	exit		B	4
2016-07-04	17	1	2	17:41:53	02:51:53	00:31:51	Lob	S_attempt		E	192
2016-07-04	17	1	2	17:58:24	03:08:24	00:12:59	Lob	exit		T	1
2016-07-04	17	1	2	18:26:44	03:36:44	00:05:56	Lob	exit		B	1
2016-07-04	17	1	2	19:18:20	04:28:20	00:22:09	Lob	S_attempt		T	21
2016-07-04	17	1	2	19:21:28	04:31:28	00:25:17	Lob	exit		B	5
2016-07-04	17	1	2	19:22:56	04:32:56	00:26:45	Lob	S_attempt		B	3
2016-07-04	17	1	2	19:37:38	04:47:38	00:06:04	Lob	exit		B	1
2016-07-04	17	1	2	20:48:42	05:58:42	00:06:22	Lob	S_attempt		E	167
2016-07-04	17	1	2	20:53:46	06:03:46	00:11:26	Lob	end	3
2016-07-05	18	2	2	08:35:00	00:00:00	00:04:10	Lob	start
2016-07-05	18	2	2	13:12:39	04:37:39	00:34:08	Lob	S_attempt		E	66
2016-07-05	18	2	2	13:22:00	04:47:00	00:08:06	Lob	S_attempt		T	3
2016-07-05	18	2	2	13:26:12	04:51:12	00:12:18	Lob	exit		E	1
2016-07-05	18	2	2	13:27:53	04:52:53	00:13:59	Lob	exit		T	9
2016-07-05	18	2	2	14:17:57	05:42:57	00:28:40	Lob	S_attempt		E	609
2016-07-05	18	2	2	16:00:36	07:25:36	00:25:10	Lob	exit		B	2
2016-07-05	18	2	2	16:01:55	07:26:55	00:26:29	Lob	S_attempt		E	13
2016-07-05	18	2	2	16:29:00	07:54:00	00:18:11	Lob	S_attempt		E	675
2016-07-05	18	2	2	20:21:27	11:46:27	00:02:57	Lob	S_attempt		E	108
2016-07-05	18	2	2	20:58:50	12:23:50	00:04:57	Lob	exit		B	4
2016-07-05	18	2	2	21:00:31	12:25:31	00:06:38	Lob	S_attempt		E	141
2016-07-05	18	2	2	21:03:17	12:28:17	00:09:24	Lob	end	4
2016-07-06	19	3	2	09:15:00	00:00:00	00:01:00	Lob	start
2016-07-06	19	3	2	10:20:19	01:05:19	00:30:56	Lob	S_attempt		E	293
2016-07-06	19	3	2	11:48:37	02:33:37	00:13:05	Lob	S_attempt		E	40
2016-07-06	19	3	2	11:55:35	02:40:35	00:20:03	Lob	exit		E	6
2016-07-06	19	3	2	12:26:10	03:11:10	00:15:15	Lob	exit		B	9
2016-07-06	19	3	2	12:59:22	03:44:22	00:13:04	Lob	S_attempt		E	116
2016-07-06	19	3	2	13:11:20	03:56:20	00:25:02	Lob	S_attempt		E	172
2016-07-06	19	3	2	13:18:57	04:03:57	00:32:39	Lob	exit		B	4
2016-07-06	19	3	2	13:48:31	04:33:31	00:26:50	Lob	S_attempt		E	191
2016-07-06	19	3	2	13:57:23	04:42:23	00:00:19	Lob	exit		T	4
2016-07-06	19	3	2	18:18:00	09:03:00	00:13:15	Lob	S_attempt		E	38
2016-07-06	19	3	2	18:36:17	09:21:17	00:31:32	Lob	exit		B	4
2016-07-06	19	3	2	19:23:17	10:08:17	00:07:46	Lob	S_attempt		T	2
2016-07-06	19	3	2	19:23:59	10:08:59	00:08:28	Lob	exit		T	1
2016-07-06	19	3	2	20:07:34	10:52:34	00:16:40	Lob	S_attempt		E	562
2016-07-06	19	3	2	21:01:47	11:46:47	00:00:07	Lob	S_attempt		E	58
2016-07-06	19	3	2	21:05:52	11:50:52	00:04:12	Lob	exit		E	11
2016-07-06	19	3	2	21:32:13	12:17:13	00:30:33	Lob	end	2
2016-07-07	20	4	2	09:27:00	00:00:00	00:01:00	Lob	start
2016-07-07	20	4	2	09:39:30	00:12:30	00:13:30	Lob	S_attempt		B	10
2016-07-07	20	4	2	09:43:52	00:16:52	00:17:52	Lob	exit		B	3
2016-07-07	20	4	2	09:58:20	00:31:20	00:32:20	Lob	S_attempt		E	35
2016-07-07	20	4	2	10:24:16	00:57:16	00:22:53	Lob	S_attempt		E	86
2016-07-07	20	4	2	10:57:07	01:30:07	00:20:21	Lob	S_attempt		B	6
2016-07-07	20	4	2	10:58:36	01:31:36	00:21:50	Lob	exit		B	4
2016-07-07	20	4	2	13:27:53	04:00:53	00:29:35	Lob	S_attempt		E	587
2016-07-07	20	4	2	13:38:24	04:11:24	00:04:43	Lob	exit		E	1
2016-07-07	20	4	2	16:17:20	06:50:20	00:22:07	Lob	S_attempt		T	70
2016-07-07	20	4	2	16:20:37	06:53:37	00:25:24	Lob	exit		T	6
2016-07-07	20	4	2	16:28:11	07:01:11	00:32:58	Lob	S_attempt		T	11
2016-07-07	20	4	2	16:28:52	07:01:52	00:33:39	Lob	exit		T	5
2016-07-07	20	4	2	16:29:54	07:02:54	00:34:41	Lob	S_attempt		T	34
2016-07-07	20	4	2	16:31:12	07:04:12	00:00:36	Lob	exit		T	6
2016-07-07	20	4	2	16:31:42	07:04:42	00:01:06	Lob	S_attempt		T	26
2016-07-07	20	4	2	16:34:43	07:07:43	00:04:07	Lob	exit		T	4
2016-07-07	20	4	2	16:35:31	07:08:31	00:04:55	Lob	S_attempt		T	9
2016-07-07	20	4	2	16:35:58	07:08:58	00:05:22	Lob	exit		T	1
2016-07-07	20	4	2	16:49:21	07:22:21	00:18:45	Lob	S_attempt		T	37
2016-07-07	20	4	2	16:51:05	07:24:05	00:20:29	Lob	exit		T	4
2016-07-07	20	4	2	20:04:57	10:37:57	00:02:03	Lob	S_attempt		T	10
2016-07-07	20	4	2	20:06:10	10:39:10	00:03:16	Lob	exit		T	1
2016-07-07	20	4	2	20:10:18	10:43:18	00:07:24	Lob	S_attempt		T	19
2016-07-07	20	4	2	20:18:16	10:51:16	00:15:22	Lob	exit		T	3
2016-07-07	20	4	2	20:27:38	11:00:38	00:24:44	Lob	S_attempt		E	75
2016-07-07	20	4	2	20:29:44	11:02:44	00:26:50	Lob	S_attempt		E	134
2016-07-07	20	4	2	20:31:59	11:04:59	00:29:05	Lob	exit		E	1
2016-07-07	20	4	2	20:49:19	11:22:19	00:11:02	Lob	exit		T	1
2016-07-07	20	4	2	21:20:40	11:53:40	00:07:00	Lob	end	7
2016-07-18	21	5	2	16:05:00	00:00:00	00:02:00	Lob	start
2016-07-18	21	5	2	20:55:34	04:50:34	00:09:30	Lob	end	1
2016-07-19	22	6	2	18:50:00	00:00:00	00:05:00	Lob	start
2016-07-19	22	6	2	10:27:29	12:55:57	00:02:31	Lob	end	0
2016-08-08	23	7	2	14:42:00	00:00:00	00:01:00	Lob	start
2016-08-08	23	7	2	14:49:54	00:07:54	00:08:54	Lob	S_attempt		B	2
2016-08-08	23	7	2	14:58:31	00:16:31	00:17:31	Lob	S_attempt		B	2
2016-08-08	23	7	2	14:59:28	00:17:28	00:18:28	Lob	exit		B	2
2016-08-08	23	7	2	15:03:48	00:21:48	00:22:48	Lob	exit		B	3
2016-08-08	23	7	2	15:12:07	00:30:07	00:31:07	Lob	S_attempt		E	241
2016-08-08	23	7	2	15:18:28	00:36:28	00:02:19	Lob	S_attempt		T	22
2016-08-08	23	7	2	15:20:06	00:38:06	00:03:57	Lob	exit		P	1
2016-08-08	23	7	2	15:56:45	01:14:45	00:05:27	Lob	S_attempt		E	34
2016-08-08	23	7	2	15:58:44	01:16:44	00:07:26	Lob	exit		T	2
2016-08-08	23	7	2	16:03:45	01:21:45	00:12:27	Lob	S_attempt		E	183
2016-08-08	23	7	2	16:15:35	01:33:35	00:24:17	Lob	S_attempt		E	1102
2016-08-08	23	7	2	16:38:31	01:56:31	00:12:04	Lob	S_attempt		B	10
2016-08-08	23	7	2	16:38:45	01:56:45	00:12:18	Lob	exit		B	4
2016-08-08	23	7	2	16:43:10	02:01:10	00:16:43	Lob	S_attempt		B	4
2016-08-08	23	7	2	16:44:08	02:02:08	00:17:41	Lob	exit		B	2
2016-08-08	23	7	2	16:45:08	02:03:08	00:18:41	Lob	S_attempt		B	3
2016-08-08	23	7	2	16:46:18	02:04:18	00:19:51	Lob	exit		B	2
2016-08-08	23	7	2	17:11:47	02:29:47	00:10:11	Lob	S_attempt		B	18
2016-08-08	23	7	2	17:33:19	02:51:19	00:31:43	Lob	exit		E	11
2016-08-08	23	7	2	18:11:01	03:29:01	00:34:16	Lob	S_attempt		B	4
2016-08-08	23	7	2	18:11:54	03:29:54	00:35:09	Lob	end	3
2016-08-09	24	8	2	08:50:00	00:00:00	00:01:00	Lob	start
2016-08-09	24	8	2	09:39:50	00:49:50	00:15:41	Lob	S_attempt		T	10
2016-08-09	24	8	2	09:40:02	00:50:02	00:15:53	Lob	exit		T	3
2016-08-09	24	8	2	09:40:20	00:50:20	00:16:11	Lob	S_attempt		T	6
2016-08-09	24	8	2	09:40:31	00:50:31	00:16:22	Lob	exit		T	2
2016-08-09	24	8	2	09:43:33	00:53:33	00:19:24	Lob	S_attempt		T	8
2016-08-09	24	8	2	09:44:43	00:54:43	00:20:34	Lob	exit		T	1
2016-08-09	24	8	2	09:44:54	00:54:54	00:20:45	Lob	S_attempt		T	2
2016-08-09	24	8	2	09:45:21	00:55:21	00:21:12	Lob	exit		P	1
2016-08-09	24	8	2	09:53:46	01:03:46	00:29:37	Lob	S_attempt		T	4
2016-08-09	24	8	2	09:54:03	01:04:03	00:29:54	Lob	exit		T	1
2016-08-09	24	8	2	09:59:25	01:09:25	00:00:07	Lob	S_attempt		T	4
2016-08-09	24	8	2	10:02:07	01:12:07	00:02:49	Lob	exit		B	2
2016-08-09	24	8	2	10:02:15	01:12:15	00:02:57	Lob	S_attempt		B	4
2016-08-09	24	8	2	10:16:30	01:26:30	00:17:12	Lob	exit		B	2
2016-08-09	24	8	2	10:20:43	01:30:43	00:21:25	Lob	S_attempt		T	2
2016-08-09	24	8	2	10:21:38	01:31:38	00:22:20	Lob	S_attempt		E	24
2016-08-09	24	8	2	10:22:03	01:32:03	00:22:45	Lob	exit		T	1
2016-08-09	24	8	2	10:25:45	01:35:45	00:26:27	Lob	S_attempt		B	3
2016-08-09	24	8	2	10:26:14	01:36:14	00:26:56	Lob	exit		B	1
2016-08-09	24	8	2	10:34:17	01:44:17	00:34:59	Lob	S_attempt		T	4
2016-08-09	24	8	2	10:35:13	01:45:13	00:00:46	Lob	exit		T	1
2016-08-09	24	8	2	10:47:27	01:57:27	00:13:00	Lob	S_attempt		B	3
2016-08-09	24	8	2	10:50:00	02:00:00	00:15:33	Lob	exit		B	2
2016-08-09	24	8	2	10:53:55	02:03:55	00:19:28	Lob	S_attempt		T	2
2016-08-09	24	8	2	10:59:47	02:09:47	00:25:20	Lob	S_attempt		T	15
2016-08-09	24	8	2	11:01:16	02:11:16	00:26:49	Lob	exit		T	1
2016-08-09	24	8	2	11:21:07	02:31:07	00:11:31	Lob	S_attempt		B	5
2016-08-09	24	8	2	11:22:19	02:32:19	00:12:43	Lob	exit		B	3
2016-08-09	24	8	2	11:22:49	02:32:49	00:13:13	Lob	S_attempt		B	3
2016-08-09	24	8	2	11:23:00	02:33:00	00:13:24	Lob	exit		B	2
2016-08-09	24	8	2	11:23:58	02:33:58	00:14:22	Lob	S_attempt		B	11
2016-08-09	24	8	2	11:24:11	02:34:11	00:14:35	Lob	exit		B	2
2016-08-09	24	8	2	11:25:04	02:35:04	00:15:28	Lob	S_attempt		B	4
2016-08-09	24	8	2	11:26:11	02:36:11	00:16:35	Lob	exit		B	11
2016-08-09	24	8	2	11:29:17	02:39:17	00:19:41	Lob	S_attempt		B	9
2016-08-09	24	8	2	11:29:36	02:39:36	00:20:00	Lob	exit		B	1
2016-08-09	24	8	2	11:31:50	02:41:50	00:22:14	Lob	S_attempt		B	10
2016-08-09	24	8	2	11:33:29	02:43:29	00:23:53	Lob	exit		B	3
2016-08-09	24	8	2	11:33:47	02:43:47	00:24:11	Lob	S_attempt		E	51
2016-08-09	24	8	2	12:22:27	03:32:27	00:02:33	Lob	S_attempt		T	5
2016-08-09	24	8	2	12:22:45	03:32:45	00:02:51	Lob	exit		T	3
2016-08-09	24	8	2	12:50:16	04:00:16	00:30:22	Lob	S_attempt		B	4
2016-08-09	24	8	2	12:50:28	04:00:28	00:30:34	Lob	S_attempt		B	7
2016-08-09	24	8	2	12:50:46	04:00:46	00:30:52	Lob	exit		B	1
2016-08-09	24	8	2	12:52:16	04:02:16	00:32:22	Lob	exit		B	2
2016-08-09	24	8	2	13:06:17	04:16:17	00:11:14	Lob	S_attempt		E	20
2016-08-09	24	8	2	13:10:14	04:20:14	00:15:11	Lob	exit		E	5
2016-08-09	24	8	2	13:29:48	04:39:48	00:34:45	Lob	S_attempt		T	9
2016-08-09	24	8	2	13:35:06	04:45:06	00:04:54	Lob	S_attempt		T	6
2016-08-09	24	8	2	13:36:28	04:46:28	00:06:16	Lob	exit		T	1
2016-08-09	24	8	2	13:38:46	04:48:46	00:08:34	Lob	S_attempt		T	16
2016-08-09	24	8	2	13:38:59	04:48:59	00:08:47	Lob	exit		T	4
2016-08-09	24	8	2	13:42:08	04:52:08	00:11:56	Lob	S_attempt		T	35
2016-08-09	24	8	2	13:42:48	04:52:48	00:12:36	Lob	exit		T	2
2016-08-09	24	8	2	13:43:25	04:53:25	00:13:13	Lob	S_attempt		T	5
2016-08-09	24	8	2	13:43:59	04:53:59	00:13:47	Lob	exit		T	4
2016-08-09	24	8	2	13:47:32	04:57:32	00:17:20	Lob	S_attempt		B	5
2016-08-09	24	8	2	13:47:57	04:57:57	00:17:45	Lob	exit		B	4
2016-08-09	24	8	2	13:56:13	05:06:13	00:26:01	Lob	S_attempt		T	41
2016-08-09	24	8	2	13:57:01	05:07:01	00:26:49	Lob	exit		B	1
2016-08-09	24	8	2	14:01:44	05:11:44	00:31:32	Lob	S_attempt		T	4
2016-08-09	24	8	2	14:02:39	05:12:39	00:32:27	Lob	exit		T	2
2016-08-09	24	8	2	14:21:08	05:31:08	00:15:47	Lob	S_attempt		T	4
2016-08-09	24	8	2	14:21:34	05:31:34	00:16:13	Lob	exit		T	2
2016-08-09	24	8	2	14:33:49	05:43:49	00:28:28	Lob	S_attempt		T	8
2016-08-09	24	8	2	14:34:04	05:44:04	00:28:43	Lob	exit		T	2
2016-08-09	24	8	2	15:12:15	06:22:15	00:31:45	Lob	S_attempt		T	8
2016-08-09	24	8	2	15:17:30	06:27:30	00:01:51	Lob	exit		T	1
2016-08-09	24	8	2	15:36:00	06:46:00	00:20:21	Lob	S_attempt		T	17
2016-08-09	24	8	2	15:36:36	06:46:36	00:20:57	Lob	exit		T	2
2016-08-09	24	8	2	15:37:23	06:47:23	00:21:44	Lob	S_attempt		T	14
2016-08-09	24	8	2	15:37:59	06:47:59	00:22:20	Lob	exit		T	8
2016-08-09	24	8	2	16:14:31	07:24:31	00:23:43	Lob	S_attempt		T	16
2016-08-09	24	8	2	16:15:51	07:25:51	00:25:03	Lob	exit		T	6
2016-08-09	24	8	2	16:22:22	07:32:22	00:31:34	Lob	S_attempt		T	6
2016-08-09	24	8	2	16:22:33	07:32:33	00:31:45	Lob	exit		T	4
2016-08-09	24	8	2	16:24:40	07:34:40	00:33:52	Lob	S_attempt		T	11
2016-08-09	24	8	2	16:25:03	07:35:03	00:34:15	Lob	exit		T	4
2016-08-09	24	8	2	16:41:13	07:51:13	00:15:16	Lob	S_attempt		T	7
2016-08-09	24	8	2	16:41:25	07:51:25	00:15:28	Lob	exit		T	2
2016-08-09	24	8	2	16:49:35	07:59:35	00:23:38	Lob	S_attempt		T	9
2016-08-09	24	8	2	16:50:34	08:00:34	00:24:37	Lob	exit		T	3
2016-08-09	24	8	2	17:10:14	08:20:14	00:09:08	Lob	S_attempt		E	48
2016-08-09	24	8	2	17:40:11	08:50:11	00:03:56	Lob	S_attempt		B	4
2016-08-09	24	8	2	17:40:30	08:50:30	00:04:15	Lob	exit		B	2
2016-08-09	24	8	2	17:56:35	09:06:35	00:20:20	Lob	S_attempt		B	4
2016-08-09	24	8	2	17:56:58	09:06:58	00:20:43	Lob	exit		B	4
2016-08-09	24	8	2	18:47:30	09:57:30	00:00:57	Lob	S_attempt		E	9
2016-08-09	24	8	2	19:58:31	11:08:31	00:01:40	Lob	S_attempt		E	10
2016-08-09	24	8	2	20:41:00	11:51:00	00:09:00	Lob	end	3
2016-08-10	25	9	2	09:25:00	00:00:00	00:01:00	Lob	start
2016-08-10	25	9	2	10:08:32	00:43:32	00:09:23	Lob	S_attempt		B	1
2016-08-10	25	9	2	10:09:48	00:44:48	00:10:39	Lob	exit		T	5
2016-08-10	25	9	2	10:10:21	00:45:21	00:11:12	Lob	S_attempt		T	3
2016-08-10	25	9	2	10:10:48	00:45:48	00:11:39	Lob	exit		T	1
2016-08-10	25	9	2	10:11:10	00:46:10	00:12:01	Lob	S_attempt		T	5
2016-08-10	25	9	2	10:11:51	00:46:51	00:12:42	Lob	exit		T	1
2016-08-10	25	9	2	10:12:45	00:47:45	00:13:36	Lob	S_attempt		K	5
2016-08-10	25	9	2	10:15:17	00:50:17	00:16:08	Lob	S_attempt		B	5
2016-08-10	25	9	2	10:16:27	00:51:27	00:17:18	Lob	exit		T	3
2016-08-10	25	9	2	10:16:47	00:51:47	00:17:38	Lob	S_attempt		T	1
2016-08-10	25	9	2	10:17:39	00:52:39	00:18:30	Lob	exit		B	4
2016-08-10	25	9	2	10:17:47	00:52:47	00:18:38	Lob	S_attempt		T	9
2016-08-10	25	9	2	10:18:30	00:53:30	00:19:21	Lob	S_attempt		B	4
2016-08-10	25	9	2	10:18:36	00:53:36	00:19:27	Lob	S_attempt		E	42
2016-08-10	25	9	2	10:19:40	00:54:40	00:20:31	Lob	exit		E	15
2016-08-10	25	9	2	10:21:28	00:56:28	00:22:19	Lob	exit		T	4
2016-08-10	25	9	2	10:21:52	00:56:52	00:22:43	Lob	S_attempt		T	6
2016-08-10	25	9	2	10:23:57	00:58:57	00:24:48	Lob	exit		T	2
2016-08-10	25	9	2	10:24:05	00:59:05	00:24:56	Lob	S_attempt		T	5
2016-08-10	25	9	2	10:32:20	01:07:20	00:33:11	Lob	S_attempt		E	112
2016-08-10	25	9	2	10:33:46	01:08:46	00:34:37	Lob	exit		T	2
2016-08-10	25	9	2	10:34:19	01:09:19	00:00:01	Lob	S_attempt		T	2
2016-08-10	25	9	2	10:37:12	01:12:12	00:02:54	Lob	exit		T	2
2016-08-10	25	9	2	10:38:13	01:13:13	00:03:55	Lob	S_attempt		T	5
2016-08-10	25	9	2	10:38:49	01:13:49	00:04:31	Lob	exit		T	2
2016-08-10	25	9	2	10:46:22	01:21:22	00:12:04	Lob	S_attempt		B	1
2016-08-10	25	9	2	10:47:23	01:22:23	00:13:05	Lob	S_attempt		E	108
2016-08-10	25	9	2	10:47:52	01:22:52	00:13:34	Lob	exit		B	1
2016-08-10	25	9	2	10:53:47	01:28:47	00:19:29	Lob	exit		T	2
2016-08-10	25	9	2	10:54:04	01:29:04	00:19:46	Lob	S_attempt		T	24
2016-08-10	25	9	2	10:55:23	01:30:23	00:21:05	Lob	exit		B	4
2016-08-10	25	9	2	11:01:34	01:36:34	00:27:16	Lob	S_attempt		T	7
2016-08-10	25	9	2	11:02:09	01:37:09	00:27:51	Lob	exit		T	2
2016-08-10	25	9	2	11:02:39	01:37:39	00:28:21	Lob	S_attempt		T	9
2016-08-10	25	9	2	11:03:21	01:38:21	00:29:03	Lob	exit		T	2
2016-08-10	25	9	2	11:03:44	01:38:44	00:29:26	Lob	S_attempt		T	7
2016-08-10	25	9	2	11:04:07	01:39:07	00:29:49	Lob	exit		T	2
2016-08-10	25	9	2	11:06:47	01:41:47	00:32:29	Lob	S_attempt		T	3
2016-08-10	25	9	2	11:09:15	01:44:15	00:34:57	Lob	exit		B	2
2016-08-10	25	9	2	11:09:36	01:44:36	00:00:09	Lob	exit		E	25
2016-08-10	25	9	2	11:11:38	01:46:38	00:02:11	Lob	S_attempt		B	6
2016-08-10	25	9	2	11:12:36	01:47:36	00:03:09	Lob	exit		T	4
2016-08-10	25	9	2	11:12:59	01:47:59	00:03:32	Lob	S_attempt		T	5
2016-08-10	25	9	2	11:13:52	01:48:52	00:04:25	Lob	exit		B	2
2016-08-10	25	9	2	11:14:59	01:49:59	00:05:32	Lob	S_attempt		B	9
2016-08-10	25	9	2	11:15:22	01:50:22	00:05:55	Lob	exit		B	3
2016-08-10	25	9	2	11:15:35	01:50:35	00:06:08	Lob	S_attempt		B	1
2016-08-10	25	9	2	11:16:16	01:51:16	00:06:49	Lob	exit		B	2
2016-08-10	25	9	2	11:19:20	01:54:20	00:09:53	Lob	S_attempt		B	4
2016-08-10	25	9	2	11:19:25	01:54:25	00:09:58	Lob	exit		B	4
2016-08-10	25	9	2	11:34:46	02:09:46	00:25:19	Lob	S_attempt		B	4
2016-08-10	25	9	2	11:35:15	02:10:15	00:25:48	Lob	S_attempt		B	6
2016-08-10	25	9	2	11:35:33	02:10:33	00:26:06	Lob	S_attempt		B	3
2016-08-10	25	9	2	11:35:41	02:10:41	00:26:14	Lob	exit		T	1
2016-08-10	25	9	2	11:35:47	02:10:47	00:26:20	Lob	exit		P	1
2016-08-10	25	9	2	11:46:45	02:21:45	00:02:09	Lob	S_attempt		B	8
2016-08-10	25	9	2	11:54:03	02:29:03	00:09:27	Lob	exit		B	6
2016-08-10	25	9	2	11:55:24	02:30:24	00:10:48	Lob	S_attempt		B	7
2016-08-10	25	9	2	11:59:14	02:34:14	00:14:38	Lob	exit		B	7
2016-08-10	25	9	2	12:01:17	02:36:17	00:16:41	Lob	S_attempt		B	5
2016-08-10	25	9	2	12:05:47	02:40:47	00:21:11	Lob	exit		B	5
2016-08-10	25	9	2	12:12:07	02:47:07	00:27:31	Lob	S_attempt		B	8
2016-08-10	25	9	2	12:13:00	02:48:00	00:28:24	Lob	S_attempt		T	3
2016-08-10	25	9	2	12:13:16	02:48:16	00:28:40	Lob	exit		T	1
2016-08-10	25	9	2	12:15:07	02:50:07	00:30:31	Lob	S_attempt		T	9
2016-08-10	25	9	2	12:15:31	02:50:31	00:30:55	Lob	exit		T	5
2016-08-10	25	9	2	12:17:47	02:52:47	00:33:11	Lob	exit		B	3
2016-08-10	25	9	2	12:32:33	03:07:33	00:12:48	Lob	S_attempt		B	7
2016-08-10	25	9	2	12:34:35	03:09:35	00:14:50	Lob	exit		B	3
2016-08-10	25	9	2	12:56:13	03:31:13	00:01:19	Lob	S_attempt		T	14
2016-08-10	25	9	2	13:05:36	03:40:36	00:10:42	Lob	S_attempt		E	591
2016-08-10	25	9	2	13:19:21	03:54:21	00:24:27	Lob	exit		T	4
2016-08-10	25	9	2	13:28:00	04:03:00	00:33:06	Lob	S_attempt		T	33
2016-08-10	25	9	2	13:32:32	04:07:32	00:02:29	Lob	exit		T	2
2016-08-10	25	9	2	13:41:22	04:16:22	00:11:19	Lob	S_attempt		B	12
2016-08-10	25	9	2	13:41:36	04:16:36	00:11:33	Lob	exit		B	6
2016-08-10	25	9	2	13:45:49	04:20:49	00:15:46	Lob	S_attempt		B	3
2016-08-10	25	9	2	13:47:47	04:22:47	00:17:44	Lob	exit		T	4
2016-08-10	25	9	2	13:47:58	04:22:58	00:17:55	Lob	S_attempt		T	2
2016-08-10	25	9	2	13:48:33	04:23:33	00:18:30	Lob	S_attempt		E	12
2016-08-10	25	9	2	13:49:12	04:24:12	00:19:09	Lob	exit		B	2
2016-08-10	25	9	2	13:54:44	04:29:44	00:24:41	Lob	exit		B	9
2016-08-10	25	9	2	14:13:45	04:48:45	00:08:33	Lob	S_attempt		T	53
2016-08-10	25	9	2	14:14:41	04:49:41	00:09:29	Lob	exit		T	2
2016-08-10	25	9	2	14:16:13	04:51:13	00:11:01	Lob	S_attempt		B	3
2016-08-10	25	9	2	14:17:13	04:52:13	00:12:01	Lob	exit		T	9
2016-08-10	25	9	2	14:21:17	04:56:17	00:16:05	Lob	S_attempt		T	6
2016-08-10	25	9	2	14:23:19	04:58:19	00:18:07	Lob	exit		B	5
2016-08-10	25	9	2	14:27:51	05:02:51	00:22:39	Lob	S_attempt		T	20
2016-08-10	25	9	2	14:28:17	05:03:17	00:23:05	Lob	exit		T	4
2016-08-10	25	9	2	14:34:39	05:09:39	00:29:27	Lob	S_attempt		T	8
2016-08-10	25	9	2	14:36:07	05:11:07	00:30:55	Lob	S_attempt		T	25
2016-08-10	25	9	2	14:36:13	05:11:13	00:31:01	Lob	exit		T	4
2016-08-10	25	9	2	14:37:19	05:12:19	00:32:07	Lob	exit		T	4
2016-08-10	25	9	2	14:37:38	05:12:38	00:32:26	Lob	S_attempt		B	2
2016-08-10	25	9	2	14:38:10	05:13:10	00:32:58	Lob	exit		T	3
2016-08-10	25	9	2	14:39:27	05:14:27	00:34:15	Lob	S_attempt		T	4
2016-08-10	25	9	2	14:44:39	05:19:39	00:04:18	Lob	exit		B	3
2016-08-10	25	9	2	14:51:45	05:26:45	00:11:24	Lob	S_attempt		B	8
2016-08-10	25	9	2	14:52:49	05:27:49	00:12:28	Lob	exit		T	4
2016-08-10	25	9	2	14:54:07	05:29:07	00:13:46	Lob	S_attempt		T	4
2016-08-10	25	9	2	14:57:43	05:32:43	00:17:22	Lob	exit		T	3
2016-08-10	25	9	2	14:58:04	05:33:04	00:17:43	Lob	S_attempt		T	15
2016-08-10	25	9	2	15:00:24	05:35:24	00:20:03	Lob	exit		T	2
2016-08-10	25	9	2	15:01:55	05:36:55	00:21:34	Lob	S_attempt		T	5
2016-08-10	25	9	2	15:03:18	05:38:18	00:22:57	Lob	exit		P	3
2016-08-10	25	9	2	15:06:45	05:41:45	00:26:24	Lob	S_attempt		E	33
2016-08-10	25	9	2	15:12:03	05:47:03	00:31:42	Lob	S_attempt		T	2
2016-08-10	25	9	2	15:15:41	05:50:41	00:00:11	Lob	S_attempt		T	5
2016-08-10	25	9	2	15:15:59	05:50:59	00:00:29	Lob	exit		T	3
2016-08-10	25	9	2	15:17:07	05:52:07	00:01:37	Lob	S_attempt		B	4
2016-08-10	25	9	2	15:18:20	05:53:20	00:02:50	Lob	exit		B	3
2016-08-10	25	9	2	15:18:22	05:53:22	00:02:52	Lob	exit		P	4
2016-08-10	25	9	2	15:23:00	05:58:00	00:07:30	Lob	S_attempt		E	9
2016-08-10	25	9	2	15:39:36	06:14:36	00:24:06	Lob	S_attempt		T	3
2016-08-10	25	9	2	15:40:05	06:15:05	00:24:35	Lob	exit		T	3
2016-08-10	25	9	2	15:56:38	06:31:38	00:05:59	Lob	S_attempt		E	8
2016-08-10	25	9	2	15:57:31	06:32:31	00:06:52	Lob	exit		T	1
2016-08-10	25	9	2	16:48:29	07:23:29	00:22:41	Lob	S_attempt		B	11
2016-08-10	25	9	2	16:49:40	07:24:40	00:23:52	Lob	exit		B	2
2016-08-10	25	9	2	17:04:48	07:39:48	00:03:51	Lob	S_attempt		B	6
2016-08-10	25	9	2	17:08:07	07:43:07	00:07:10	Lob	exit		B	6
2016-08-10	25	9	2	17:40:38	08:15:38	00:04:32	Lob	S_attempt		T	20
2016-08-10	25	9	2	17:45:01	08:20:01	00:08:55	Lob	exit		B	1
2016-08-10	25	9	2	18:27:42	09:02:42	00:16:27	Lob	S_attempt		T	9
2016-08-10	25	9	2	18:40:18	09:15:18	00:29:03	Lob	exit		T	5
2016-08-10	25	9	2	18:41:58	09:16:58	00:30:43	Lob	S_attempt		T	13
2016-08-10	25	9	2	18:48:55	09:23:55	00:02:31	Lob	exit		B	1
2016-08-10	25	9	2	19:52:54	10:27:54	00:31:21	Lob	S_attempt		T	13
2016-08-10	25	9	2	19:55:48	10:30:48	00:34:15	Lob	exit		P	5
2016-08-10	25	9	2	20:14:27	10:49:27	00:17:45	Lob	S_attempt		E	412
2016-08-10	25	9	2	20:21:25	10:56:25	00:24:43	Lob	exit		E	95
2016-08-10	25	9	2	20:25:58	11:00:58	00:29:16	Lob	S_attempt		T	7
2016-08-10	25	9	2	20:26:39	11:01:39	00:29:57	Lob	S_attempt		T	3
2016-08-10	25	9	2	20:26:51	11:01:51	00:30:09	Lob	exit		T	4
2016-08-10	25	9	2	20:28:04	11:03:04	00:31:22	Lob	exit		T	3
2016-08-10	25	9	2	20:40:51	11:15:51	00:09:00	Lob	end	3
2016-08-11	26	10	2	09:26:00	00:00:00	00:00:30		start
2016-08-11	26	10	2	10:06:00	00:40:00	00:05:21	Lob	S_attempt		E	7
2016-08-11	26	10	2	10:12:44	00:46:44	00:12:05	Lob	S_attempt		T	3
2016-08-11	26	10	2	10:12:50	00:46:50	00:12:11	Lob	exit		T	1
2016-08-11	26	10	2	10:20:08	00:54:08	00:19:29	Lob	S_attempt		T	2
2016-08-11	26	10	2	10:20:23	00:54:23	00:19:44	Lob	exit		T	1
2016-08-11	26	10	2	10:20:51	00:54:51	00:20:12	Lob	S_attempt		T	3
2016-08-11	26	10	2	10:34:30	01:08:30	00:33:51	Lob	S_attempt		B	5
2016-08-11	26	10	2	10:36:12	01:10:12	00:00:24	Lob	exit		B	2
2016-08-11	26	10	2	10:46:07	01:20:07	00:10:19	Lob	exit		B	3
2016-08-11	26	10	2	10:46:33	01:20:33	00:10:45	Lob	S_attempt		T	9
2016-08-11	26	10	2	10:50:33	01:24:33	00:14:45	Lob	S_attempt		B	2
2016-08-11	26	10	2	10:51:56	01:25:56	00:16:08	Lob	exit		T	2
2016-08-11	26	10	2	10:52:24	01:26:24	00:16:36	Lob	exit		T	1
2016-08-11	26	10	2	10:53:11	01:27:11	00:17:23	Lob	S_attempt		E	45
2016-08-11	26	10	2	10:55:02	01:29:02	00:19:14	Lob	exit		B	2
2016-08-11	26	10	2	10:56:35	01:30:35	00:20:47	Lob	S_attempt		B	10
2016-08-11	26	10	2	10:56:43	01:30:43	00:20:55	Lob	S_attempt		T	5
2016-08-11	26	10	2	10:56:58	01:30:58	00:21:10	Lob	exit		T	1
2016-08-11	26	10	2	10:57:27	01:31:27	00:21:39	Lob	exit		B	2
2016-08-11	26	10	2	10:57:55	01:31:55	00:22:07	Lob	S_attempt		E	15
2016-08-11	26	10	2	11:00:44	01:34:44	00:24:56	Lob	S_attempt		T	3
2016-08-11	26	10	2	11:00:50	01:34:50	00:25:02	Lob	exit		K	1
2016-08-11	26	10	2	11:06:56	01:40:56	00:31:08	Lob	exit		B	1
2016-08-11	26	10	2	11:17:51	01:51:51	00:06:54	Lob	S_attempt		B	3
2016-08-11	26	10	2	11:18:20	01:52:20	00:07:23	Lob	exit		B	2
2016-08-11	26	10	2	11:24:50	01:58:50	00:13:53	Lob	S_attempt		T	3
2016-08-11	26	10	2	11:28:53	02:02:53	00:17:56	Lob	exit		B	2
2016-08-11	26	10	2	11:36:55	02:10:55	00:25:58	Lob	S_attempt		T	5
2016-08-11	26	10	2	11:37:33	02:11:33	00:26:36	Lob	exit		T	2
2016-08-11	26	10	2	11:36:55	02:10:55	00:25:58	Lob	S_attempt		T	4
2016-08-11	26	10	2	11:37:34	02:11:34	00:26:37	Lob	exit		T	8
2016-08-11	26	10	2	11:39:54	02:13:54	00:28:57	Lob	S_attempt		B	5
2016-08-11	26	10	2	11:42:53	02:16:53	00:31:56	Lob	S_attempt		E	11
2016-08-11	26	10	2	11:45:21	02:19:21	00:34:24	Lob	exit		B	2
2016-08-11	26	10	2	11:58:19	02:32:19	00:12:13	Lob	S_attempt		E	42
2016-08-11	26	10	2	12:03:26	02:37:26	00:17:20	Lob	exit		B	7
2016-08-11	26	10	2	12:07:06	02:41:06	00:21:00	Lob	S_attempt		T	5
2016-08-11	26	10	2	12:07:19	02:41:19	00:21:13	Lob	exit		T	1
2016-08-11	26	10	2	12:15:11	02:49:11	00:29:05	Lob	S_attempt		T	3
2016-08-11	26	10	2	12:16:39	02:50:39	00:30:33	Lob	exit		B	2
2016-08-11	26	10	2	12:50:41	03:24:41	00:29:26	Lob	S_attempt		K	1
2016-08-11	26	10	2	12:52:23	03:26:23	00:31:08	Lob	exit		T	3
2016-08-11	26	10	2	12:53:06	03:27:06	00:31:51	Lob	S_attempt		E	100
2016-08-11	26	10	2	12:55:53	03:29:53	00:34:38	Lob	exit		E	1
2016-08-11	26	10	2	12:56:25	03:30:25	00:00:01	Lob	S_attempt		T	2
2016-08-11	26	10	2	12:59:22	03:33:22	00:02:58	Lob	exit		K	1
2016-08-11	26	10	2	13:07:02	03:41:02	00:10:38	Lob	S_attempt		T	3
2016-08-11	26	10	2	13:07:12	03:41:12	00:10:48	Lob	exit		B	4
2016-08-11	26	10	2	13:08:16	03:42:16	00:11:52	Lob	exit		T	1
2016-08-11	26	10	2	13:08:30	03:42:30	00:12:06	Lob	S_attempt		T	1
2016-08-11	26	10	2	13:09:25	03:43:25	00:13:01	Lob	S_attempt		T	6
2016-08-11	26	10	2	13:09:54	03:43:54	00:13:30	Lob	exit		T	1
2016-08-11	26	10	2	13:09:59	03:43:59	00:13:35	Lob	exit		K	1
2016-08-11	26	10	2	13:10:23	03:44:23	00:13:59	Lob	S_attempt		T	15
2016-08-11	26	10	2	13:11:19	03:45:19	00:14:55	Lob	S_attempt		B	2
2016-08-11	26	10	2	13:11:52	03:45:52	00:15:28	Lob	exit		B	1
2016-08-11	26	10	2	13:12:55	03:46:55	00:16:31	Lob	exit		T	1
2016-08-11	26	10	2	13:13:40	03:47:40	00:17:16	Lob	S_attempt		T	5
2016-08-11	26	10	2	13:15:22	03:49:22	00:18:58	Lob	exit		T	4
2016-08-11	26	10	2	13:20:19	03:54:19	00:23:55	Lob	S_attempt		E	20
2016-08-11	26	10	2	13:28:34	04:02:34	00:32:10	Lob	S_attempt		T	2
2016-08-11	26	10	2	13:29:00	04:03:00	00:32:36	Lob	exit		T	1
2016-08-11	26	10	2	13:34:55	04:08:55	00:03:22	Lob	exit		B	2
2016-08-11	26	10	2	13:39:43	04:13:43	00:08:10	Lob	S_attempt		B	5
2016-08-11	26	10	2	13:40:55	04:14:55	00:09:22	Lob	exit		P	1
2016-08-11	26	10	2	13:41:36	04:15:36	00:10:03	Lob	S_attempt		B	2
2016-08-11	26	10	2	13:42:55	04:16:55	00:11:22	Lob	exit		B	1
2016-08-11	26	10	2	13:44:08	04:18:08	00:12:35	Lob	S_attempt		B	5
2016-08-11	26	10	2	13:44:42	04:18:42	00:13:09	Lob	exit		B	2
2016-08-11	26	10	2	13:58:56	04:32:56	00:27:23	Lob	S_attempt		T	138
2016-08-11	26	10	2	14:05:48	04:39:48	00:34:15	Lob	S_attempt		T	8
2016-08-11	26	10	2	14:06:09	04:40:09	00:34:36	Lob	exit		T	1
2016-08-11	26	10	2	14:11:02	04:45:02	00:04:20	Lob	exit		B	1
2016-08-11	26	10	2	14:17:39	04:51:39	00:10:57	Lob	S_attempt		T	2
2016-08-11	26	10	2	14:19:03	04:53:03	00:12:21	Lob	exit		B	2
2016-08-11	26	10	2	14:28:39	05:02:39	00:21:57	Lob	S_attempt		E	14
2016-08-11	26	10	2	14:32:18	05:06:18	00:25:36	Lob	S_attempt		B	10
2016-08-11	26	10	2	14:32:52	05:06:52	00:26:10	Lob	exit		B	3
2016-08-11	26	10	2	14:37:51	05:11:51	00:31:09	Lob	S_attempt		T	3
2016-08-11	26	10	2	14:38:47	05:12:47	00:32:05	Lob	exit		P	1
2016-08-11	26	10	2	14:40:47	05:14:47	00:34:05	Lob	S_attempt		T	2
2016-08-11	26	10	2	14:45:00	05:19:00	00:03:09	Lob	S_attempt		T	4
2016-08-11	26	10	2	14:47:28	05:21:28	00:05:37	Lob	exit		T	1
2016-08-11	26	10	2	14:54:53	05:28:53	00:13:02	Lob	S_attempt			6
2016-08-11	26	10	2	15:03:55	05:37:55	00:22:04	Lob	S_attempt		T	99
2016-08-11	26	10	2	15:06:30	05:40:30	00:24:39	Lob	exit		T	3
2016-08-11	26	10	2	15:25:29	05:59:29	00:08:29	Lob	S_attempt		T	9
2016-08-11	26	10	2	15:25:42	05:59:42	00:08:42	Lob	exit		T	1
2016-08-11	26	10	2	15:28:23	06:02:23	00:11:23	Lob	S_attempt		T	3
2016-08-11	26	10	2	15:29:23	06:03:23	00:12:23	Lob	S_attempt		T	3
2016-08-11	26	10	2	15:30:24	06:04:24	00:13:24	Lob	exit		T	2
2016-08-11	26	10	2	15:30:50	06:04:50	00:13:50	Lob	S_attempt		T	14
2016-08-11	26	10	2	15:31:31	06:05:31	00:14:31	Lob	exit		T	4
2016-08-11	26	10	2	15:35:11	06:09:11	00:18:11	Lob	exit		T	2
2016-08-11	26	10	2	15:56:33	06:30:33	00:04:24	Lob	S_attempt		E	17
2016-08-11	26	10	2	16:35:13	07:09:13	00:07:55	Lob	S_attempt		T	7
2016-08-11	26	10	2	17:33:29	08:07:29	00:31:02	Lob	S_attempt		T	6
2016-08-11	26	10	2	17:34:03	08:08:03	00:31:36	Lob	exit		T	6
2016-08-11	26	10	2	18:19:58	08:53:58	00:07:13	Lob	S_attempt		T	3
2016-08-11	26	10	2	18:20:10	08:54:10	00:07:25	Lob	exit		T	1
2016-08-11	26	10	2	18:24:22	08:58:22	00:11:37	Lob	S_attempt		E	30
2016-08-11	26	10	2	18:30:01	09:04:01	00:17:16	Lob	exit		T	2
2016-08-11	26	10	2	18:44:27	09:18:27	00:31:42	Lob	S_attempt		T	5
2016-08-11	26	10	2	18:44:58	09:18:58	00:32:13	Lob	exit		T	1
2016-08-11	26	10	2	19:44:24	10:18:24	00:21:21	Lob	S_attempt		T	79
2016-08-11	26	10	2	20:04:03	10:38:03	00:05:51	Lob	S_attempt		T	20
2016-08-11	26	10	2	20:04:49	10:38:49	00:06:37	Lob	exit		T	1
2016-08-11	26	10	2	20:28:12	11:02:12	00:30:00		end	5
2016-08-22	27	11	2	14:51:00	00:00:00	00:01:00	Lob	start
2016-08-22	27	11	2	15:03:40	00:12:40	00:13:40	Lob	S_attempt		B	2
2016-08-22	27	11	2	15:04:10	00:13:10	00:14:10	Lob	exit		B	1
2016-08-22	27	11	2	15:10:57	00:19:57	00:20:57	Lob	S_attempt		T	3
2016-08-22	27	11	2	15:13:02	00:22:02	00:23:02	Lob	exit		T	2
2016-08-22	27	11	2	15:14:50	00:23:50	00:24:50	Lob	S_attempt		T	2
2016-08-22	27	11	2	15:26:58	00:35:58	00:01:35	Lob	exit		T	3
2016-08-22	27	11	2	15:27:44	00:36:44	00:02:21	Lob	S_attempt		T	5
2016-08-22	27	11	2	15:32:14	00:41:14	00:06:51	Lob	S_attempt		T	13
2016-08-22	27	11	2	15:33:45	00:42:45	00:08:22	Lob	exit		T	2
2016-08-22	27	11	2	15:35:04	00:44:04	00:09:41	Lob	S_attempt		T	21
2016-08-22	27	11	2	15:36:42	00:45:42	00:11:19	Lob	exit		B	1
2016-08-22	27	11	2	15:50:32	00:59:32	00:25:09	Lob	exit		T	2
2016-08-22	27	11	2	15:50:44	00:59:44	00:25:21	Lob	S_attempt		T	1
2016-08-22	27	11	2	15:51:53	01:00:53	00:26:30	Lob	S_attempt		T	2
2016-08-22	27	11	2	15:51:55	01:00:55	00:26:32	Lob	exit		T	1
2016-08-22	27	11	2	15:57:03	01:06:03	00:31:40	Lob	exit		B	2
2016-08-22	27	11	2	15:57:27	01:06:27	00:32:04	Lob	S_attempt		E	419
2016-08-22	27	11	2	15:59:24	01:08:24	00:34:01	Lob	S_attempt		T	6
2016-08-22	27	11	2	16:01:08	01:10:08	00:00:22	Lob	exit		K	1
2016-08-22	27	11	2	16:11:25	01:20:25	00:10:39	Lob	S_attempt		E	92
2016-08-22	27	11	2	16:12:55	01:21:55	00:12:09	Lob	S_attempt		E	49
2016-08-22	27	11	2	16:17:24	01:26:24	00:16:38	Lob	exit		B	2
2016-08-22	27	11	2	16:24:45	01:33:45	00:23:59	Lob	S_attempt		T	6
2016-08-22	27	11	2	16:25:55	01:34:55	00:25:09	Lob	exit		T	1
2016-08-22	27	11	2	16:27:48	01:36:48	00:27:02	Lob	S_attempt		T	14
2016-08-22	27	11	2	16:28:11	01:37:11	00:27:25	Lob	exit		K	1
2016-08-22	27	11	2	16:41:22	01:50:22	00:05:13	Lob	S_attempt		T	4
2016-08-22	27	11	2	16:42:47	01:51:47	00:06:38	Lob	exit		B	1
2016-08-22	27	11	2	16:43:37	01:52:37	00:07:28	Lob	S_attempt		T	5
2016-08-22	27	11	2	16:50:48	01:59:48	00:14:39	Lob	exit		T	2
2016-08-22	27	11	2	16:53:54	02:02:54	00:17:45	Lob	S_attempt		T	10
2016-08-22	27	11	2	16:54:23	02:03:23	00:18:14	Lob	exit		T	1
2016-08-22	27	11	2	16:56:35	02:05:35	00:20:26	Lob	S_attempt			2
2016-08-22	27	11	2	16:59:06	02:08:06	00:22:57	Lob	exit		B	1
2016-08-22	27	11	2	17:01:24	02:10:24	00:25:15	Lob	S_attempt		T	3
2016-08-22	27	11	2	17:03:41	02:12:41	00:27:32	Lob	exit		T	1
2016-08-22	27	11	2	17:10:26	02:19:26	00:34:17	Lob	S_attempt		E	52
2016-08-22	27	11	2	17:10:54	02:19:54	00:34:45	Lob	S_attempt		T	7
2016-08-22	27	11	2	17:11:16	02:20:16	00:35:07	Lob	exit		T	2
2016-08-22	27	11	2	17:12:31	02:21:31	00:00:59	Lob	S_attempt		T	3
2016-08-22	27	11	2	17:12:37	02:21:37	00:01:05	Lob	exit		B	3
2016-08-22	27	11	2	17:14:18	02:23:18	00:02:46	Lob	exit		B	1
2016-08-22	27	11	2	17:15:23	02:24:23	00:03:51	Lob	S_attempt		T	3
2016-08-22	27	11	2	17:15:51	02:24:51	00:04:19	Lob	exit		B	2
2016-08-22	27	11	2	17:20:26	02:29:26	00:08:54	Lob	S_attempt		B	2
2016-08-22	27	11	2	17:21:24	02:30:24	00:09:52	Lob	exit		T	3
2016-08-22	27	11	2	17:30:16	02:39:16	00:18:44	Lob	S_attempt		T	8
2016-08-22	27	11	2	17:31:02	02:40:02	00:19:30	Lob	S_attempt		T	18
2016-08-22	27	11	2	17:31:37	02:40:37	00:20:05	Lob	exit		T	3
2016-08-22	27	11	2	17:31:55	02:40:55	00:20:23	Lob	S_attempt		T	10
2016-08-22	27	11	2	17:32:16	02:41:16	00:20:44	Lob	exit		T	1
2016-08-22	27	11	2	17:32:18	02:41:18	00:20:46	Lob	exit		B	1
2016-08-22	27	11	2	17:33:05	02:42:05	00:21:33	Lob	S_attempt		T	4
2016-08-22	27	11	2	17:35:29	02:44:29	00:23:57	Lob	exit		T	4
2016-08-22	27	11	2	17:38:34	02:47:34	00:27:02	Lob	S_attempt		T	5
2016-08-22	27	11	2	17:39:08	02:48:08	00:27:36	Lob	S_attempt		T	16
2016-08-22	27	11	2	17:39:43	02:48:43	00:28:11	Lob	exit		T	1
2016-08-22	27	11	2	17:44:51	02:53:51	00:33:19	Lob	exit		P	12
2016-08-22	27	11	2	17:46:29	02:55:29	00:34:57	Lob	S_attempt		T	4
2016-08-22	27	11	2	17:47:56	02:56:56	00:01:01	Lob	exit		T	6
2016-08-22	27	11	2	17:51:24	03:00:24	00:04:29	Lob	S_attempt		T	4
2016-08-22	27	11	2	17:52:00	03:01:00	00:05:05	Lob	exit		T	10
2016-08-22	27	11	2	17:52:23	03:01:23	00:05:28	Lob	S_attempt		T	3
2016-08-22	27	11	2	17:53:12	03:02:12	00:06:17	Lob	exit		T	1
2016-08-22	27	11	2	17:54:41	03:03:41	00:07:46	Lob	S_attempt		T	18
2016-08-22	27	11	2	17:55:43	03:04:43	00:08:48	Lob	exit		T	1
2016-08-22	27	11	2	17:56:44	03:05:44	00:09:49	Lob	S_attempt		T	3
2016-08-22	27	11	2	18:00:17	03:09:17	00:13:22	Lob	S_attempt		T	5
2016-08-22	27	11	2	18:01:32	03:10:32	00:14:37	Lob	exit		T	2
2016-08-22	27	11	2	18:03:10	03:12:10	00:16:15	Lob	exit		B	2
2016-08-22	27	11	2	18:07:49	03:16:49	00:20:54	Lob	S_attempt		T	4
2016-08-22	27	11	2	18:08:32	03:17:32	00:21:37	Lob	exit		T	2
2016-08-22	27	11	2	18:14:55	03:23:55	00:28:00	Lob	S_attempt		T	17
2016-08-22	27	11	2	18:16:05	03:25:05	00:29:10	Lob	exit		T	18
2016-08-22	27	11	2	18:17:35	03:26:35	00:30:40	Lob	S_attempt		T	18
2016-08-22	27	11	2	18:18:53	03:27:53	00:31:58	Lob	S_attempt		T	12
2016-08-22	27	11	2	18:20:10	03:29:10	00:33:15	Lob	exit		B	3
2016-08-22	27	11	2	18:21:43	03:30:43	00:34:48	Lob	exit		T	4
2016-08-22	27	11	2	18:24:24	03:33:24	00:02:06	Lob	S_attempt		T	15
2016-08-22	27	11	2	18:24:45	03:33:45	00:02:27	Lob	exit		T	1
2016-08-22	27	11	2	18:29:58	03:38:58	00:07:40	Lob	S_attempt		T	9
2016-08-22	27	11	2	18:31:22	03:40:22	00:09:04	Lob	exit		T	1
2016-08-22	27	11	2	18:32:07	03:41:07	00:09:49	Lob	S_attempt		T	2
2016-08-22	27	11	2	18:32:32	03:41:32	00:10:14	Lob	exit		T	2
2016-08-22	27	11	2	18:42:10	03:51:10	00:19:52	Lob	S_attempt		T	10
2016-08-22	27	11	2	18:44:50	03:53:50	00:22:32	Lob	exit		T	2
2016-08-22	27	11	2	18:53:31	04:02:31	00:31:13	Lob	S_attempt		T	4
2016-08-22	27	11	2	18:54:14	04:03:14	00:31:56	Lob	exit		T	2
2016-08-22	27	11	2	18:59:49	04:08:49	00:02:08	Lob	S_attempt		T	8
2016-08-22	27	11	2	19:00:04	04:09:04	00:02:23	Lob	exit		T	3
2016-08-22	27	11	2	19:03:51	04:12:51	00:06:10	Lob	S_attempt		B	2
2016-08-22	27	11	2	19:04:13	04:13:13	00:06:32	Lob	exit		B	1
2016-08-22	27	11	2	19:33:05	04:42:05	00:00:01	Lob	S_attempt		T	11
2016-08-22	27	11	2	19:33:59	04:42:59	00:00:55	Lob	exit		T	1
2016-08-22	27	11	2	19:56:45	05:05:45	00:23:41	Lob	S_attempt		T	11
2016-08-22	27	11	2	19:56:58	05:05:58	00:23:54	Lob	exit		T	1
2016-08-22	27	11	2	19:58:52	05:07:52	00:25:48	Lob	S_attempt		E	160
2016-08-22	27	11	2	20:02:55	05:11:55	00:29:51	Lob	exit		E	37
2016-08-22	27	11	2	20:06:50	05:15:50	00:33:46	Lob	S_attempt		E	87
2016-08-22	27	11	2	20:09:14	05:18:14	00:00:47	Lob	end	3
2016-08-23	28	12	2	09:16:00	00:00:00	00:01:00	Lob	start
2016-08-23	28	12	2	09:58:07	00:42:07	00:07:44	Lob	S_attempt		B	6
2016-08-23	28	12	2	10:00:40	00:44:40	00:10:17	Lob	exit		B	1
2016-08-23	28	12	2	10:00:53	00:44:53	00:10:30	Lob	S_attempt		B	4
2016-08-23	28	12	2	10:04:13	00:48:13	00:13:50	Lob	S_attempt		B	5
2016-08-23	28	12	2	10:04:49	00:48:49	00:14:26	Lob	exit		B	2
2016-08-23	28	12	2	10:08:35	00:52:35	00:18:12	Lob	S_attempt		E	168
2016-08-23	28	12	2	10:14:20	00:58:20	00:23:57	Lob	exit		E	1
2016-08-23	28	12	2	10:16:03	01:00:03	00:25:40	Lob	S_attempt		E	85
2016-08-23	28	12	2	10:22:41	01:06:41	00:32:18	Lob	exit		B	5
2016-08-23	28	12	2	10:26:57	01:10:57	00:01:11	Lob	S_attempt		E	30
2016-08-23	28	12	2	10:29:31	01:13:31	00:03:45	Lob	exit		B	4
2016-08-23	28	12	2	10:35:15	01:19:15	00:09:29	Lob	S_attempt		T	16
2016-08-23	28	12	2	10:35:52	01:19:52	00:10:06	Lob	exit		E	10
2016-08-23	28	12	2	10:56:42	01:40:42	00:30:56	Lob	S_attempt		E	60
2016-08-23	28	12	2	11:15:36	01:59:36	00:14:27	Lob	S_attempt		E	25
2016-08-23	28	12	2	11:30:52	02:14:52	00:29:43	Lob	S_attempt		B	11
2016-08-23	28	12	2	11:31:14	02:15:14	00:30:05	Lob	exit		B	4
2016-08-23	28	12	2	11:31:52	02:15:52	00:30:43	Lob	S_attempt		B	7
2016-08-23	28	12	2	11:34:19	02:18:19	00:33:10	Lob	exit		B	4
2016-08-23	28	12	2	11:43:24	02:27:24	00:06:52	Lob	exit		B	15
2016-08-23	28	12	2	11:50:16	02:34:16	00:13:44	Lob	S_attempt		B	5
2016-08-23	28	12	2	11:51:01	02:35:01	00:14:29	Lob	S_attempt		T	11
2016-08-23	28	12	2	11:55:17	02:39:17	00:18:45	Lob	exit		B	3
2016-08-23	28	12	2	11:56:33	02:40:33	00:20:01	Lob	exit		B	2
2016-08-23	28	12	2	12:07:45	02:51:45	00:31:13	Lob	S_attempt		E	60
2016-08-23	28	12	2	12:13:11	02:57:11	00:01:16	Lob	exit		T	1
2016-08-23	28	12	2	13:57:36	04:41:36	00:34:55	Lob	S_attempt		E	837
2016-08-23	28	12	2	14:24:54	05:08:54	00:26:50	Lob	exit		E	1
2016-08-23	28	12	2	14:57:15	05:41:15	00:23:48	Lob	S_attempt		E	27
2016-08-23	28	12	2	15:22:19	06:06:19	00:13:29	Lob	S_attempt		E	92
2016-08-23	28	12	2	15:24:17	06:08:17	00:15:27	Lob	exit		B	3
2016-08-23	28	12	2	17:38:40	08:22:40	00:08:18	Lob	S_attempt		T	35
2016-08-23	28	12	2	17:39:55	08:23:55	00:09:33	Lob	exit		T	4
2016-08-23	28	12	2	18:17:17	09:01:17	00:11:32	Lob	S_attempt		T	9
2016-08-23	28	12	2	18:21:32	09:05:32	00:15:47	Lob	exit		T	5
2016-08-23	28	12	2	18:22:38	09:06:38	00:16:53	Lob	S_attempt		T	12
2016-08-23	28	12	2	18:31:54	09:15:54	00:26:09	Lob	exit		T	3
2016-08-23	28	12	2	18:33:13	09:17:13	00:27:28	Lob	S_attempt		T	7
2016-08-23	28	12	2	18:36:08	09:20:08	00:30:23	Lob	exit		T	2
2016-08-23	28	12	2	18:37:22	09:21:22	00:31:37	Lob	S_attempt		T	2
2016-08-23	28	12	2	19:01:50	09:45:50	00:20:42	Lob	exit		T	8
2016-08-23	28	12	2	19:42:19	10:26:19	00:25:48	Lob	S_attempt		T	10
2016-08-23	28	12	2	19:44:55	10:28:55	00:28:24	Lob	exit		T	6
2016-08-23	28	12	2	19:54:10	10:38:10	00:02:16	Lob	S_attempt		T	44
2016-08-23	28	12	2	19:58:57	10:42:57	00:07:03	Lob	exit		T	4
2016-08-23	28	12	2	20:07:04	10:51:04	00:15:10	Lob	S_attempt		T	2
2016-08-23	28	12	2	20:09:00	10:53:00	00:17:06	Lob	exit		T	4
2016-08-23	28	12	2	20:13:12	10:57:12	00:21:18	Lob	S_attempt		T	8
2016-08-23	28	12	2	20:16:54	11:00:54	00:25:00	Lob	end	1
2016-08-24	29	13	2	09:05:00	00:00:00	00:02:00	Lob	start
2016-08-24	29	13	2	09:21:08	00:16:08	00:18:08	Lob	S_attempt		E	37
2016-08-24	29	13	2	09:29:29	00:24:29	00:26:29	Lob	S_attempt		E	20
2016-08-24	29	13	2	09:30:53	00:25:53	00:27:53	Lob	exit		E	9
2016-08-24	29	13	2	10:07:16	01:02:16	00:28:53	Lob	S_attempt		E	68
2016-08-24	29	13	2	10:23:07	01:18:07	00:09:21	Lob	S_attempt		T	1
2016-08-24	29	13	2	10:23:51	01:18:51	00:10:05	Lob	exit		T	2
2016-08-24	29	13	2	10:43:53	01:38:53	00:30:07	Lob	S_attempt		T	6
2016-08-24	29	13	2	10:44:22	01:39:22	00:30:36	Lob	exit		T	1
2016-08-24	29	13	2	10:48:17	01:43:17	00:34:31	Lob	S_attempt		P	2
2016-08-24	29	13	2	10:49:05	01:44:05	00:35:19	Lob	exit		B	1
2016-08-24	29	13	2	11:05:54	02:00:54	00:16:45	Lob	S_attempt		E	94
2016-08-24	29	13	2	11:09:05	02:04:05	00:19:56	Lob	S_attempt		T	10
2016-08-24	29	13	2	11:10:52	02:05:52	00:21:43	Lob	exit		T	1
2016-08-24	29	13	2	11:47:42	02:42:42	00:23:10	Lob	S_attempt		E	47
2016-08-24	29	13	2	12:01:55	02:56:55	00:02:00	Lob	S_attempt		E	147
2016-08-24	29	13	2	12:07:13	03:02:13	00:07:18	Lob	S_attempt		B	2
2016-08-24	29	13	2	12:09:45	03:04:45	00:09:50	Lob	exit		B	1
2016-08-24	29	13	2	12:14:58	03:09:58	00:15:03	Lob	S_attempt		T	3
2016-08-24	29	13	2	12:15:24	03:10:24	00:15:29	Lob	exit		T	3
2016-08-24	29	13	2	12:25:51	03:20:51	00:25:56	Lob	exit		B	44
2016-08-24	29	13	2	12:50:23	03:45:23	00:15:05	Lob	exit		B	1
2016-08-24	29	13	2	12:59:45	03:54:45	00:24:27	Lob	S_attempt		B	6
2016-08-24	29	13	2	13:00:50	03:55:50	00:25:32	Lob	S_attempt		T	11
2016-08-24	29	13	2	13:01:38	03:56:38	00:26:20	Lob	exit		T	3
2016-08-24	29	13	2	13:01:51	03:56:51	00:26:33	Lob	exit		B	3
2016-08-24	29	13	2	13:08:04	04:03:04	00:32:46	Lob	S_attempt		T	3
2016-08-24	29	13	2	13:13:15	04:08:15	00:02:34	Lob	exit		T	4
2016-08-24	29	13	2	13:16:09	04:11:09	00:05:28	Lob	S_attempt		T	5
2016-08-24	29	13	2	13:16:28	04:11:28	00:05:47	Lob	exit		T	3
2016-08-24	29	13	2	13:16:52	04:11:52	00:06:11	Lob	S_attempt		T	4
2016-08-24	29	13	2	13:18:08	04:13:08	00:07:27	Lob	exit		T	2
2016-08-24	29	13	2	13:18:24	04:13:24	00:07:43	Lob	S_attempt		T	4
2016-08-24	29	13	2	13:18:31	04:13:31	00:07:50	Lob	exit		T	2
2016-08-24	29	13	2	13:20:24	04:15:24	00:09:43	Lob	S_attempt		T	22
2016-08-24	29	13	2	13:21:50	04:16:50	00:11:09	Lob	exit		T	1
2016-08-24	29	13	2	13:23:34	04:18:34	00:12:53	Lob	S_attempt		T	2
2016-08-24	29	13	2	13:23:43	04:18:43	00:13:02	Lob	exit		T	1
2016-08-24	29	13	2	13:23:57	04:18:57	00:13:16	Lob	S_attempt		T	11
2016-08-24	29	13	2	13:26:51	04:21:51	00:16:10	Lob	exit		T	2
2016-08-24	29	13	2	13:39:40	04:34:40	00:28:59	Lob	S_attempt		T	15
2016-08-24	29	13	2	13:39:57	04:34:57	00:29:16	Lob	exit		T	9
2016-08-24	29	13	2	13:41:38	04:36:38	00:30:57	Lob	S_attempt		T	4
2016-08-24	29	13	2	13:42:02	04:37:02	00:31:21	Lob	exit		T	1
2016-08-24	29	13	2	13:27:07	04:57:30	00:16:26	Lob	S_attempt		T	3
2016-08-24	29	13	2	13:28:46	04:59:09	00:18:05	Lob	exit		T	3
2016-08-24	29	13	2	13:49:34	05:19:57	00:03:30	Lob	S_attempt		T	10
2016-08-24	29	13	2	13:51:06	05:21:29	00:05:02	Lob	exit		T	4
2016-08-24	29	13	2	13:52:46	05:23:09	00:06:42	Lob	S_attempt		P	3
2016-08-24	29	13	2	13:52:57	05:23:20	00:06:53	Lob	S_attempt		T	11
2016-08-24	29	13	2	13:53:34	05:23:57	00:07:30	Lob	exit		T	2
2016-08-24	29	13	2	13:55:34	05:25:57	00:09:30	Lob	exit		T	1
2016-08-24	29	13	2	13:57:38	05:28:01	00:11:34	Lob	S_attempt		B	1
2016-08-24	29	13	2	13:59:01	05:29:24	00:12:57	Lob	exit		K	1
2016-08-24	29	13	2	13:59:58	05:30:21	00:13:54	Lob	S_attempt		T	11
2016-08-24	29	13	2	14:01:25	05:31:48	00:15:21	Lob	exit		B	1
2016-08-24	29	13	2	14:07:21	05:37:44	00:21:17	Lob	S_attempt		B	2
2016-08-24	29	13	2	14:07:55	05:38:18	00:21:51	Lob	exit		B	1
2016-08-24	29	13	2	14:17:06	05:47:29	00:31:02	Lob	S_attempt		B	1
2016-08-24	29	13	2	14:18:53	05:49:16	00:32:49	Lob	exit		K	1
2016-08-24	29	13	2	14:21:47	05:52:10	00:00:20	Lob	S_attempt		T	10
2016-08-24	29	13	2	14:23:44	05:54:07	00:02:17	Lob	exit		T	2
2016-08-24	29	13	2	14:25:21	05:55:44	00:03:54	Lob	S_attempt		T	17
2016-08-24	29	13	2	14:27:34	05:57:57	00:06:07	Lob	exit		T	3
2016-08-24	29	13	2	14:32:56	06:03:19	00:11:29	Lob	S_attempt		T	5
2016-08-24	29	13	2	14:35:15	06:05:38	00:13:48	Lob	exit		B	1
2016-08-24	29	13	2	14:40:07	06:10:30	00:18:40	Lob	S_attempt		B	2
2016-08-24	29	13	2	14:44:03	06:14:26	00:22:36	Lob	exit		T	1
2016-08-24	29	13	2	14:50:06	06:20:29	00:28:39	Lob	S_attempt		T	4
2016-08-24	29	13	2	14:52:52	06:23:15	00:31:25	Lob	exit		B	3
2016-08-24	29	13	2	14:56:54	06:27:17	00:00:04	Lob	S_attempt		T	8
2016-08-24	29	13	2	14:59:19	06:29:42	00:02:29	Lob	exit		T	1
2016-08-24	29	13	2	14:59:44	06:30:07	00:02:54	Lob	S_attempt		T	3
2016-08-24	29	13	2	15:04:05	06:34:28	00:07:15	Lob	exit		T	2
2016-08-24	29	13	2	15:24:01	06:54:24	00:27:11	Lob	S_attempt		P	6
2016-08-24	29	13	2	15:27:35	06:57:58	00:30:45	Lob	exit		T	25
2016-08-24	29	13	2	15:28:35	06:58:58	00:31:45	Lob	S_attempt		T	11
2016-08-24	29	13	2	15:30:04	07:00:27	00:33:14	Lob	exit		T	7
2016-08-24	29	13	2	15:52:46	07:23:09	00:20:33	Lob	S_attempt		T	5
2016-08-24	29	13	2	15:58:15	07:28:38	00:26:02	Lob	exit		K	1
2016-08-24	29	13	2	16:02:40	07:33:03	00:30:27	Lob	S_attempt		T	4
2016-08-24	29	13	2	16:40:17	08:10:40	00:32:41	Lob	exit		T	3
2016-08-24	29	13	2	16:45:43	08:16:06	00:02:44	Lob	S_attempt		T	6
2016-08-24	29	13	2	16:46:59	08:17:22	00:04:00	Lob	exit		T	2
2016-08-24	29	13	2	16:48:04	08:18:27	00:05:05	Lob	S_attempt		T	3
2016-08-24	29	13	2	16:50:09	08:20:32	00:07:10	Lob	S_attempt		E	135
2016-08-24	29	13	2	16:50:25	08:20:48	00:07:26	Lob	exit		T	2
2016-08-24	29	13	2	16:53:20	08:23:43	00:10:21	Lob	S_attempt		T	9
2016-08-24	29	13	2	16:55:24	08:25:47	00:12:25	Lob	exit		T	1
2016-08-24	29	13	2	16:56:39	08:27:02	00:13:40	Lob	S_attempt		T	5
2016-08-24	29	13	2	16:56:47	08:27:10	00:13:48	Lob	S_attempt		T	6
2016-08-24	29	13	2	16:57:15	08:27:38	00:14:16	Lob	exit		T	3
2016-08-24	29	13	2	16:57:31	08:27:54	00:14:32	Lob	exit		T	1
2016-08-24	29	13	2	17:04:41	08:35:04	00:21:42	Lob	S_attempt		T	4
2016-08-24	29	13	2	17:06:12	08:36:35	00:23:13	Lob	exit		T	2
2016-08-24	29	13	2	17:12:57	08:43:20	00:29:58	Lob	S_attempt		T	4
2016-08-24	29	13	2	17:13:44	08:44:07	00:30:45	Lob	exit		T	1
2016-08-24	29	13	2	17:24:46	08:55:09	00:06:24	Lob	S_attempt		B	2
2016-08-24	29	13	2	17:25:19	08:55:42	00:06:57	Lob	exit		T	2
2016-08-24	29	13	2	17:25:41	08:56:04	00:07:19	Lob	S_attempt		T	3
2016-08-24	29	13	2	17:32:38	09:03:01	00:14:16	Lob	exit		T	1
2016-08-24	29	13	2	17:33:20	09:03:43	00:14:58	Lob	S_attempt		T	7
2016-08-24	29	13	2	17:33:27	09:03:50	00:15:05	Lob	exit		T	7
2016-08-24	29	13	2	17:37:23	09:07:46	00:19:01	Lob	S_attempt		T	8
2016-08-24	29	13	2	17:38:32	09:08:55	00:20:10	Lob	exit		T	3
2016-08-24	29	13	2	17:54:59	09:25:22	00:01:14	Lob	S_attempt		T	4
2016-08-24	29	13	2	17:58:53	09:29:16	00:05:08	Lob	exit		T	1
2016-08-24	29	13	2	18:30:52	10:01:15	00:01:44	Lob	S_attempt		T	7
2016-08-24	29	13	2	18:32:08	10:02:31	00:03:00	Lob	exit		T	1
2016-08-24	29	13	2	18:45:46	10:16:09	00:16:38	Lob	exit		B	1
2016-08-24	29	13	2	19:34:56	11:05:19	00:30:25	Lob	end	3
2016-08-25	30	14	2	09:15:00	00:00:00	00:01:00	Lob	start
2016-08-25	30	14	2	09:27:40	00:12:40	00:13:40	Lob	S_attempt		T	14
2016-08-25	30	14	2	09:28:31	00:13:31	00:14:31	Lob	exit		B	1
2016-08-25	30	14	2	09:45:33	00:30:33	00:31:33	Lob	S_attempt		E	33
2016-08-25	30	14	2	09:48:54	00:33:54	00:34:54	Lob	S_attempt		T	7
2016-08-25	30	14	2	09:50:11	00:35:11	00:00:48	Lob	exit		T	3
2016-08-25	30	14	2	09:55:28	00:40:28	00:06:05	Lob	S_attempt		B	4
2016-08-25	30	14	2	09:55:41	00:40:41	00:06:18	Lob	exit		B	1
2016-08-25	30	14	2	09:57:57	00:42:57	00:08:34	Lob	exit		T	1
2016-08-25	30	14	2	10:03:48	00:48:48	00:14:25	Lob	S_attempt		T	13
2016-08-25	30	14	2	10:05:05	00:50:05	00:15:42	Lob	exit		T	1
2016-08-25	30	14	2	10:07:00	00:52:00	00:17:37	Lob	S_attempt		B	7
2016-08-25	30	14	2	10:09:28	00:54:28	00:20:05	Lob	exit		B	1
2016-08-25	30	14	2	10:10:10	00:55:10	00:20:47	Lob	S_attempt		B	4
2016-08-25	30	14	2	10:12:09	00:57:09	00:22:46	Lob	exit		T	1
2016-08-25	30	14	2	10:13:58	00:58:58	00:24:35	Lob	S_attempt		T	9
2016-08-25	30	14	2	10:18:54	01:03:54	00:29:31	Lob	exit		T	2
2016-08-25	30	14	2	10:19:19	01:04:19	00:29:56	Lob	S_attempt		T	2
2016-08-25	30	14	2	10:21:23	01:06:23	00:32:00	Lob	exit		B	6
2016-08-25	30	14	2	10:22:05	01:07:05	00:32:42	Lob	S_attempt		B	3
2016-08-25	30	14	2	10:25:01	01:10:01	00:00:15	Lob	exit		T	1
2016-08-25	30	14	2	10:25:15	01:10:15	00:00:29	Lob	S_attempt		B	2
2016-08-25	30	14	2	10:25:16	01:10:16	00:00:30	Lob	S_attempt		T	9
2016-08-25	30	14	2	10:25:34	01:10:34	00:00:48	Lob	exit		B	1
2016-08-25	30	14	2	10:25:40	01:10:40	00:00:54	Lob	S_attempt		E	42
2016-08-25	30	14	2	10:26:43	01:11:43	00:01:57	Lob	S_attempt		B	4
2016-08-25	30	14	2	10:27:17	01:12:17	00:02:31	Lob	exit		B	1
2016-08-25	30	14	2	10:27:46	01:12:46	00:03:00	Lob	exit		T	3
2016-08-25	30	14	2	10:28:55	01:13:55	00:04:09	Lob	S_attempt		T	7
2016-08-25	30	14	2	10:29:05	01:14:05	00:04:19	Lob	S_attempt		B	1
2016-08-25	30	14	2	10:29:44	01:14:44	00:04:58	Lob	exit		T	1
2016-08-25	30	14	2	10:29:53	01:14:53	00:05:07	Lob	exit		T	1
2016-08-25	30	14	2	10:29:58	01:14:58	00:05:12	Lob	S_attempt		T	7
2016-08-25	30	14	2	10:30:29	01:15:29	00:05:43	Lob	S_attempt		T	6
2016-08-25	30	14	2	10:31:08	01:16:08	00:06:22	Lob	exit		B	4
2016-08-25	30	14	2	10:31:31	01:16:31	00:06:45	Lob	S_attempt		T	2
2016-08-25	30	14	2	10:31:32	01:16:32	00:06:46	Lob	exit		T	1
2016-08-25	30	14	2	10:32:04	01:17:04	00:07:18	Lob	S_attempt		T	8
2016-08-25	30	14	2	10:32:26	01:17:26	00:07:40	Lob	exit		T	1
2016-08-25	30	14	2	10:33:47	01:18:47	00:09:01	Lob	exit		T	1
2016-08-25	30	14	2	10:34:05	01:19:05	00:09:19	Lob	S_attempt		T	4
2016-08-25	30	14	2	10:38:43	01:23:43	00:13:57	Lob	exit		P	1
2016-08-25	30	14	2	10:50:55	01:35:55	00:26:09	Lob	S_attempt		B	6
2016-08-25	30	14	2	10:51:46	01:36:46	00:27:00	Lob	exit		T	1
2016-08-25	30	14	2	10:52:25	01:37:25	00:27:39	Lob	S_attempt		T	5
2016-08-25	30	14	2	10:52:43	01:37:43	00:27:57	Lob	S_attempt		T	5
2016-08-25	30	14	2	10:52:53	01:37:53	00:28:07	Lob	exit		T	1
2016-08-25	30	14	2	10:53:34	01:38:34	00:28:48	Lob	S_attempt		T	20
2016-08-25	30	14	2	10:54:23	01:39:23	00:29:37	Lob	exit		T	1
2016-08-25	30	14	2	10:54:39	01:39:39	00:29:53	Lob	S_attempt		T	7
2016-08-25	30	14	2	10:56:26	01:41:26	00:31:40	Lob	exit		B	1
2016-08-25	30	14	2	11:03:13	01:48:13	00:03:04	Lob	S_attempt		T	3
2016-08-25	30	14	2	11:12:35	01:57:35	00:12:26	Lob	exit		T	1
2016-08-25	30	14	2	11:26:19	02:11:19	00:26:10	Lob	S_attempt		T	4
2016-08-25	30	14	2	11:27:13	02:12:13	00:27:04	Lob	exit		T	1
2016-08-25	30	14	2	11:46:03	02:31:03	00:10:31	Lob	S_attempt		B	7
2016-08-25	30	14	2	11:46:18	02:31:18	00:10:46	Lob	exit		B	1
2016-08-25	30	14	2	11:57:38	02:42:38	00:22:06	Lob	S_attempt		T	13
2016-08-25	30	14	2	11:59:50	02:44:50	00:24:18	Lob	S_attempt		T	5
2016-08-25	30	14	2	12:00:00	02:45:00	00:24:28	Lob	exit		T	6
2016-08-25	30	14	2	12:01:49	02:46:49	00:26:17	Lob	exit		T	1
2016-08-25	30	14	2	12:04:01	02:49:01	00:28:29	Lob	S_attempt		T	6
2016-08-25	30	14	2	12:04:18	02:49:18	00:28:46	Lob	exit		T	11
2016-08-25	30	14	2	12:15:35	03:00:35	00:04:40	Lob	S_attempt		T	12
2016-08-25	30	14	2	12:17:08	03:02:08	00:06:13	Lob	exit		T	1
2016-08-25	30	14	2	12:36:13	03:21:13	00:25:18	Lob	S_attempt		T	7
2016-08-25	30	14	2	12:37:20	03:22:20	00:26:25	Lob	exit		B	1
2016-08-25	30	14	2	12:45:18	03:30:18	00:34:23	Lob	S_attempt		B	2
2016-08-25	30	14	2	12:52:11	03:37:11	00:05:53	Lob	exit		K	1
2016-08-25	30	14	2	12:56:38	03:41:38	00:10:20	Lob	S_attempt		B	5
2016-08-25	30	14	2	12:57:26	03:42:26	00:11:08	Lob	exit		B	1
2016-08-25	30	14	2	13:01:12	03:46:12	00:14:54	Lob	exit		B	1
2016-08-25	30	14	2	13:02:42	03:47:42	00:16:24	Lob	exit		B	12
2016-08-25	30	14	2	13:23:28	04:08:28	00:01:47	Lob	S_attempt		B	5
2016-08-25	30	14	2	13:36:39	04:21:39	00:14:58	Lob	exit		B	3
2016-08-25	30	14	2	13:36:49	04:21:49	00:15:08	Lob	S_attempt		B	4
2016-08-25	30	14	2	13:41:41	04:26:41	00:20:00	Lob	S_attempt		E	50
2016-08-25	30	14	2	13:46:03	04:31:03	00:24:22	Lob	exit		T	1
2016-08-25	30	14	2	13:51:10	04:36:10	00:29:29	Lob	S_attempt		T	4
2016-08-25	30	14	2	13:53:31	04:38:31	00:31:50	Lob	exit		P	2
2016-08-25	30	14	2	14:08:40	04:53:40	00:11:36	Lob	S_attempt		B	10
2016-08-25	30	14	2	14:09:37	04:54:37	00:12:33	Lob	exit		B	1
2016-08-25	30	14	2	14:31:26	05:16:26	00:34:22	Lob	S_attempt		B	9
2016-08-25	30	14	2	14:38:31	05:23:31	00:06:04	Lob	S_attempt		B	7
2016-08-25	30	14	2	14:39:33	05:24:33	00:07:06	Lob	exit		B	3
2016-08-25	30	14	2	14:44:58	05:29:58	00:12:31	Lob	S_attempt		B	12
2016-08-25	30	14	2	14:46:01	05:31:01	00:13:34	Lob	S_attempt		T	13
2016-08-25	30	14	2	14:48:55	05:33:55	00:16:28	Lob	exit		K	1
2016-08-25	30	14	2	14:50:08	05:35:08	00:17:41	Lob	exit		T	1
2016-08-25	30	14	2	14:50:54	05:35:54	00:18:27	Lob	S_attempt		T	6
2016-08-25	30	14	2	14:52:26	05:37:26	00:19:59	Lob	exit		B	5
2016-08-25	30	14	2	14:54:50	05:39:50	00:22:23	Lob	S_attempt		B	10
2016-08-25	30	14	2	14:55:27	05:40:27	00:23:00	Lob	exit		B	1
2016-08-25	30	14	2	14:55:31	05:40:31	00:23:04	Lob	S_attempt		T	11
2016-08-25	30	14	2	14:56:57	05:41:57	00:24:30	Lob	exit		T	1
2016-08-25	30	14	2	15:17:52	06:02:52	00:10:02	Lob	S_attempt		T	9
2016-08-25	30	14	2	15:21:14	06:06:14	00:13:24	Lob	exit		T	1
2016-08-25	30	14	2	15:28:10	06:13:10	00:20:20	Lob	S_attempt		B	6
2016-08-25	30	14	2	15:33:07	06:18:07	00:25:17	Lob	exit		P	1
2016-08-25	30	14	2	15:49:48	06:34:48	00:06:35	Lob	S_attempt		B	11
2016-08-25	30	14	2	15:58:40	06:43:40	00:15:27	Lob	S_attempt		T	6
2016-08-25	30	14	2	15:59:00	06:44:00	00:15:47	Lob	exit		T	2
2016-08-25	30	14	2	16:05:35	06:50:35	00:22:22	Lob	exit		T	2
2016-08-25	30	14	2	16:18:09	07:03:09	00:34:56	Lob	exit		B	2
2016-08-25	30	14	2	16:23:39	07:08:39	00:05:03	Lob	S_attempt		B	6
2016-08-25	30	14	2	16:31:01	07:16:01	00:12:25	Lob	exit		T	2
2016-08-25	30	14	2	16:36:57	07:21:57	00:18:21	Lob	S_attempt		T	20
2016-08-25	30	14	2	16:37:37	07:22:37	00:19:01	Lob	S_attempt		B	16
2016-08-25	30	14	2	16:38:18	07:23:18	00:19:42	Lob	exit		T	1
2016-08-25	30	14	2	16:38:33	07:23:33	00:19:57	Lob	exit		B	5
2016-08-25	30	14	2	16:39:06	07:24:06	00:20:30	Lob	S_attempt		B	5
2016-08-25	30	14	2	16:40:32	07:25:32	00:21:56	Lob	exit		B	1
2016-08-25	30	14	2	16:59:10	07:44:10	00:05:11	Lob	S_attempt		T	7
2016-08-25	30	14	2	17:00:18	07:45:18	00:06:19	Lob	exit		T	2
2016-08-25	30	14	2	17:15:54	08:00:54	00:21:55	Lob	S_attempt		B	5
2016-08-25	30	14	2	17:17:37	08:02:37	00:23:38	Lob	exit		B	2
2016-08-25	30	14	2	18:21:21	09:06:21	00:16:36	Lob	S_attempt		B	1
2016-08-25	30	14	2	18:27:56	09:12:56	00:23:11	Lob	S_attempt		B	12
2016-08-25	30	14	2	18:28:52	09:13:52	00:24:07	Lob	exit		B	2
2016-08-25	30	14	2	18:30:25	09:15:25	00:25:40	Lob	exit		B	1
2016-08-25	30	14	2	18:38:54	09:23:54	00:34:09	Lob	S_attempt		T	43
2016-08-25	30	14	2	18:40:38	09:25:38	00:00:30	Lob	S_attempt		B	8
2016-08-25	30	14	2	18:41:28	09:26:28	00:01:20	Lob	S_attempt		B	5
2016-08-25	30	14	2	18:41:44	09:26:44	00:01:36	Lob	exit		B	1
2016-08-25	30	14	2	18:43:28	09:28:28	00:03:20	Lob	exit		B	1
2016-08-25	30	14	2	18:45:04	09:30:04	00:04:56	Lob	exit		T	1
2016-08-25	30	14	2	18:46:54	09:31:54	00:06:46	Lob	S_attempt		T	8
2016-08-25	30	14	2	18:55:55	09:40:55	00:15:47	Lob	exit		B	2
2016-08-25	30	14	2	19:44:41	10:29:41	00:29:10	Lob	S_attempt		T	15
2016-08-25	30	14	2	19:47:10	10:32:10	00:31:39	Lob	exit		T	1
2016-08-25	30	14	2	19:47:56	10:32:56	00:32:25	Lob	S_attempt		T	6
2016-08-25	30	14	2	19:48:54	10:33:54	00:33:23	Lob	exit		B	1
2016-08-25	30	14	2	19:51:53	10:36:53	00:00:59	Lob	S_attempt		B	3
2016-08-25	30	14	2	19:53:53	10:38:53	00:02:59	Lob	exit		B	1
2016-08-25	30	14	2	19:56:04	10:41:04	00:05:10	Lob	S_attempt		T	15
2016-08-25	30	14	2	19:56:24	10:41:24	00:05:30	Lob	exit		T	4
2016-08-25	30	14	2	20:04:18	10:49:18	00:13:24	Lob	S_attempt		T	7
2016-08-25	30	14	2	20:05:42	10:50:42	00:14:48	Lob	exit		T	6
2016-08-25	30	14	2	20:07:48	10:52:48	00:16:54	Lob	S_attempt		T	17
2016-08-25	30	14	2	20:08:26	10:53:26	00:17:32	Lob	S_attempt		T	6
2016-08-25	30	14	2	20:08:44	10:53:44	00:17:50	Lob	exit		T	1
2016-08-25	30	14	2	20:09:24	10:54:24	00:18:30	Lob	end	1
2016-09-06	31	15	2	15:41:00	00:00:00	00:01:00	Lob	start
2016-09-06	31	15	2	15:42:41	00:01:41	00:02:41	Lob	S_attempt		T	1
2016-09-06	31	15	2	15:44:42	00:03:42	00:04:42	Lob	exit		T
2016-09-06	31	15	2	15:45:18	00:04:18	00:05:18	Lob	S_attempt		P	1
2016-09-06	31	15	2	15:46:02	00:05:02	00:06:02	Lob	exit		B	1
2016-09-06	31	15	2	15:46:33	00:05:33	00:06:33	Lob	S_attempt		P	1
2016-09-06	31	15	2	15:47:08	00:06:08	00:07:08	Lob	S_attempt		B	3
2016-09-06	31	15	2	15:47:35	00:06:35	00:07:35	Lob	exit		T	1
2016-09-06	31	15	2	15:47:54	00:06:54	00:07:54	Lob	exit		T	2
2016-09-06	31	15	2	15:48:17	00:07:17	00:08:17	Lob	S_attempt		K	16
2016-09-06	31	15	2	15:49:41	00:08:41	00:09:41	Lob	exit		T	1
2016-09-06	31	15	2	15:51:49	00:10:49	00:11:49	Lob	S_attempt		T	3
2016-09-06	31	15	2	15:52:30	00:11:30	00:12:30	Lob	S_attempt		E	21
2016-09-06	31	15	2	15:53:12	00:12:12	00:13:12	Lob	exit		T	2
2016-09-06	31	15	2	15:56:31	00:15:31	00:16:31	Lob	S_attempt		T	2
2016-09-06	31	15	2	15:59:03	00:18:03	00:19:03	Lob	exit		T	1
2016-09-06	31	15	2	16:04:20	00:23:20	00:24:20	Lob	S_attempt		T	1
2016-09-06	31	15	2	16:04:48	00:23:48	00:24:48	Lob	exit		P	2
2016-09-06	31	15	2	16:06:19	00:25:19	00:26:19	Lob	S_attempt		T	3
2016-09-06	31	15	2	16:08:30	00:27:30	00:28:30	Lob	exit		K	2
2016-09-06	31	15	2	16:09:51	00:28:51	00:29:51	Lob	S_attempt		B	5
2016-09-06	31	15	2	16:11:55	00:30:55	00:31:55	Lob	exit		E	1
2016-09-06	31	15	2	16:12:11	00:31:11	00:32:11	Lob	S_attempt		T	2
2016-09-06	31	15	2	16:12:44	00:31:44	00:32:44	Lob	S_attempt		T	4
2016-09-06	31	15	2	16:12:47	00:31:47	00:32:47	Lob	S_attempt		T	4
2016-09-06	31	15	2	16:13:11	00:32:11	00:33:11	Lob	exit		T	1
2016-09-06	31	15	2	16:13:17	00:32:17	00:33:17	Lob	exit		P	1
2016-09-06	31	15	2	16:14:55	00:33:55	00:34:55	Lob	S_attempt		T	1
2016-09-06	31	15	2	16:15:08	00:34:08	00:35:08	Lob	exit		T	1
2016-09-06	31	15	2	16:15:48	00:34:48	00:00:25	Lob	S_attempt		T	2
2016-09-06	31	15	2	16:16:03	00:35:03	00:00:40	Lob	exit		T	1
2016-09-06	31	15	2	16:16:14	00:35:14	00:00:51	Lob	S_attempt		T	6
2016-09-06	31	15	2	16:16:27	00:35:27	00:01:04	Lob	exit		T	1
2016-09-06	31	15	2	16:17:09	00:36:09	00:01:46	Lob	exit		T	2
2016-09-06	31	15	2	16:17:24	00:36:24	00:02:01	Lob	S_attempt		B	3
2016-09-06	31	15	2	16:17:43	00:36:43	00:02:20	Lob	exit		B	1
2016-09-06	31	15	2	16:17:44	00:36:44	00:02:21	Lob	S_attempt		T	1
2016-09-06	31	15	2	16:18:25	00:37:25	00:03:02	Lob	exit		T	1
2016-09-06	31	15	2	16:19:27	00:38:27	00:04:04	Lob	S_attempt		B	3
2016-09-06	31	15	2	16:19:59	00:38:59	00:04:36	Lob	S_attempt		T	5
2016-09-06	31	15	2	16:20:14	00:39:14	00:04:51	Lob	exit		T	1
2016-09-06	31	15	2	16:20:32	00:39:32	00:05:09	Lob	exit		T	1
2016-09-06	31	15	2	16:20:50	00:39:50	00:05:27	Lob	S_attempt		T	1
2016-09-06	31	15	2	16:21:08	00:40:08	00:05:45	Lob	exit		P	3
2016-09-06	31	15	2	16:23:10	00:42:10	00:07:47	Lob	S_attempt		B	3
2016-09-06	31	15	2	16:24:50	00:43:50	00:09:27	Lob	S_attempt		B	3
2016-09-06	31	15	2	16:24:55	00:43:55	00:09:32	Lob	exit		B	1
2016-09-06	31	15	2	16:25:24	00:44:24	00:10:01	Lob	S_attempt		T	5
2016-09-06	31	15	2	16:25:32	00:44:32	00:10:09	Lob	exit		T	1
2016-09-06	31	15	2	16:25:37	00:44:37	00:10:14	Lob	exit		T	1
2016-09-06	31	15	2	16:27:23	00:46:23	00:12:00	Lob	S_attempt		B	2
2016-09-06	31	15	2	16:27:34	00:46:34	00:12:11	Lob	S_attempt		B	4
2016-09-06	31	15	2	16:28:07	00:47:07	00:12:44	Lob	exit		T	1
2016-09-06	31	15	2	16:29:44	00:48:44	00:14:21	Lob	exit		B	1
2016-09-06	31	15	2	16:30:38	00:49:38	00:15:15	Lob	S_attempt		T	3
2016-09-06	31	15	2	16:30:59	00:49:59	00:15:36	Lob	exit		T	1
2016-09-06	31	15	2	16:32:23	00:51:23	00:17:00	Lob	S_attempt		T	2
2016-09-06	31	15	2	16:32:34	00:51:34	00:17:11	Lob	exit		T	1
2016-09-06	31	15	2	16:32:59	00:51:59	00:17:36	Lob	S_attempt		B	4
2016-09-06	31	15	2	16:33:55	00:52:55	00:18:32	Lob	exit		B	1
2016-09-06	31	15	2	16:34:35	00:53:35	00:19:12	Lob	S_attempt		B	9
2016-09-06	31	15	2	16:34:52	00:53:52	00:19:29	Lob	exit		B	1
2016-09-06	31	15	2	16:35:08	00:54:08	00:19:45	Lob	S_attempt		B	1
2016-09-06	31	15	2	16:35:24	00:54:24	00:20:01	Lob	exit		K	3
2016-09-06	31	15	2	16:37:44	00:56:44	00:22:21	Lob	S_attempt		T	5
2016-09-06	31	15	2	16:38:08	00:57:08	00:22:45	Lob	exit		T	1
2016-09-06	31	15	2	16:40:01	00:59:01	00:24:38	Lob	S_attempt		T	4
2016-09-06	31	15	2	16:40:26	00:59:26	00:25:03	Lob	exit		T	1
2016-09-06	31	15	2	16:44:25	01:03:25	00:29:02	Lob	S_attempt		T	1
2016-09-06	31	15	2	16:44:58	01:03:58	00:29:35	Lob	exit		K	1
2016-09-06	31	15	2	16:45:21	01:04:21	00:29:58	Lob	S_attempt		T	8
2016-09-06	31	15	2	16:45:25	01:04:25	00:30:02	Lob	S_attempt		T	2
2016-09-06	31	15	2	16:45:32	01:04:32	00:30:09	Lob	exit		T	1
2016-09-06	31	15	2	16:47:08	01:06:08	00:31:45	Lob	exit		B	1
2016-09-06	31	15	2	16:49:17	01:08:17	00:33:54	Lob	S_attempt		B	6
2016-09-06	31	15	2	16:50:43	01:09:43	00:35:20	Lob	exit			1
2016-09-06	31	15	2	16:51:13	01:10:13	00:00:27	Lob	S_attempt		T	1
2016-09-06	31	15	2	16:51:59	01:10:59	00:01:13	Lob	exit		B	1
2016-09-06	31	15	2	16:55:36	01:14:36	00:04:50	Lob	S_attempt		T	1
2016-09-06	31	15	2	16:55:46	01:14:46	00:05:00	Lob	exit		T	1
2016-09-06	31	15	2	16:55:57	01:14:57	00:05:11	Lob	S_attempt		T	4
2016-09-06	31	15	2	16:57:06	01:16:06	00:06:20	Lob	exit		K	1
2016-09-06	31	15	2	17:10:34	01:29:34	00:19:48	Lob	S_attempt		B	5
2016-09-06	31	15	2	17:18:49	01:37:49	00:28:03	Lob	exit		B	1
2016-09-06	31	15	2	17:21:10	01:40:10	00:30:24	Lob	S_attempt		T	2
2016-09-06	31	15	2	17:21:21	01:40:21	00:30:35	Lob	exit		T	1
2016-09-06	31	15	2	17:36:17	01:55:17	00:10:08	Lob	S_attempt		B	3
2016-09-06	31	15	2	17:38:29	01:57:29	00:12:20	Lob	exit		B	1
2016-09-06	31	15	2	18:02:09	02:21:09	00:00:37	Lob	S_attempt		T	2
2016-09-06	31	15	2	18:03:43	02:22:43	00:02:11	Lob	exit		B	1
2016-09-06	31	15	2	18:09:38	02:28:38	00:08:06	Lob	S_attempt		E	83
2016-09-06	31	15	2	18:17:05	02:36:05	00:15:33	Lob	S_attempt		E	32
2016-09-06	31	15	2	18:18:04	02:37:04	00:16:32	Lob	S_attempt		T	1
2016-09-06	31	15	2	18:18:18	02:37:18	00:16:46	Lob	exit		T	1
2016-09-06	31	15	2	18:18:57	02:37:57	00:17:25	Lob	S_attempt		T	3
2016-09-06	31	15	2	18:19:18	02:38:18	00:17:46	Lob	exit		P	1
2016-09-06	31	15	2	18:24:12	02:43:12	00:22:40	Lob	S_attempt		T	1
2016-09-06	31	15	2	18:24:21	02:43:21	00:22:49	Lob	exit		T	1
2016-09-06	31	15	2	18:25:13	02:44:13	00:23:41	Lob	S_attempt		T	2
2016-09-06	31	15	2	18:32:08	02:51:08	00:30:36	Lob	S_attempt		T	3
2016-09-06	31	15	2	18:32:52	02:51:52	00:31:20	Lob	exit		T	1
2016-09-06	31	15	2	18:33:16	02:52:16	00:31:44	Lob	S_attempt		T	2
2016-09-06	31	15	2	18:33:35	02:52:35	00:32:03	Lob	exit		B	1
2016-09-06	31	15	2	18:39:35	02:58:35	00:02:40	Lob	S_attempt		T	1
2016-09-06	31	15	2	18:40:31	02:59:31	00:03:36	Lob	exit		B	1
2016-09-06	31	15	2	18:41:44	03:00:44	00:04:49	Lob	S_attempt		B	6
2016-09-06	31	15	2	18:42:09	03:01:09	00:05:14	Lob	exit		B	1
2016-09-06	31	15	2	18:46:03	03:05:03	00:09:08	Lob	S_attempt		T	1
2016-09-06	31	15	2	18:48:47	03:07:47	00:11:52	Lob	exit		T	1
2016-09-06	31	15	2	19:09:26	03:28:26	00:32:31	Lob	S_attempt		T	1
2016-09-06	31	15	2	19:09:36	03:28:36	00:32:41	Lob	exit		T	1
2016-09-06	31	15	2	19:15:01	03:34:01	00:02:43	Lob	S_attempt		T	3
2016-09-06	31	15	2	19:15:58	03:34:58	00:03:40	Lob	exit		B	2
2016-09-06	31	15	2	19:17:58	03:36:58	00:05:40	Lob	S_attempt		T	8
2016-09-06	31	15	2	19:18:09	03:37:09	00:05:51	Lob	exit		T	1
2016-09-06	31	15	2	19:18:27	03:37:27	00:06:09	Lob	S_attempt		T	3
2016-09-06	31	15	2	19:20:16	03:39:16	00:07:58	Lob	exit		T	1
2016-09-06	31	15	2	19:26:38	03:45:38	00:14:20	Lob	S_attempt		T	7
2016-09-06	31	15	2	19:27:30	03:46:30	00:15:12	Lob	exit		B	1
2016-09-06	31	15	2	19:39:18	03:58:18	00:27:00	Lob	end	6
2016-09-07	32	16	2	09:04:00	00:00:00	00:02:30	Lob	start
2016-09-07	32	16	2	09:06:59	00:02:59	00:05:29	Lob	S_attempt		T	21
2016-09-07	32	16	2	09:08:19	00:04:19	00:06:49	Lob	exit		T	3
2016-09-07	32	16	2	09:08:31	00:04:31	00:07:01	Lob	S_attempt		T	4
2016-09-07	32	16	2	09:09:09	00:05:09	00:07:39	Lob	exit		T	2
2016-09-07	32	16	2	09:13:59	00:09:59	00:12:29	Lob	S_attempt		T	14
2016-09-07	32	16	2	09:15:09	00:11:09	00:13:39	Lob	S_attempt		T	12
2016-09-07	32	16	2	09:16:05	00:12:05	00:14:35	Lob	exit		B	2
2016-09-07	32	16	2	09:16:52	00:12:52	00:15:22	Lob	exit		B	1
2016-09-07	32	16	2	09:23:07	00:19:07	00:21:37	Lob	S_attempt		T	3
2016-09-07	32	16	2	09:23:17	00:19:17	00:21:47	Lob	exit		B	2
2016-09-07	32	16	2	09:57:48	00:53:48	00:20:55	Lob	S_attempt		E	6
2016-09-07	32	16	2	10:01:42	00:57:42	00:24:49	Lob	exit		B	2
2016-09-07	32	16	2	10:02:39	00:58:39	00:25:46	Lob	S_attempt		T	3
2016-09-07	32	16	2	10:05:32	01:01:32	00:28:39	Lob	exit		T	2
2016-09-07	32	16	2	10:27:41	01:23:41	00:15:25	Lob	S_attempt		T	4
2016-09-07	32	16	2	10:28:30	01:24:30	00:16:14	Lob	exit		B	1
2016-09-07	32	16	2	10:42:43	01:38:43	00:30:27	Lob	S_attempt		T	2
2016-09-07	32	16	2	10:43:58	01:39:58	00:31:42	Lob	exit		T	2
2016-09-07	32	16	2	11:44:12	02:40:12	00:21:10	Lob	S_attempt		E	150
2016-09-07	32	16	2	12:15:37	03:11:37	00:17:12	Lob	S_attempt		T	8
2016-09-07	32	16	2	12:16:41	03:12:41	00:18:16	Lob	exit		T	3
2016-09-07	32	16	2	12:21:16	03:17:16	00:22:51	Lob	S_attempt		T	6
2016-09-07	32	16	2	12:27:03	03:23:03	00:28:38	Lob	exit		T	2
2016-09-07	32	16	2	13:13:54	04:09:54	00:04:43	Lob	S_attempt		T	10
2016-09-07	32	16	2	13:18:26	04:14:26	00:09:15	Lob	exit		T	2
2016-09-07	32	16	2	13:20:39	04:16:39	00:11:28	Lob	S_attempt		T	10
2016-09-07	32	16	2	13:22:31	04:18:31	00:13:20	Lob	exit		T	2
2016-09-07	32	16	2	13:23:28	04:19:28	00:14:17	Lob	S_attempt		T	18
2016-09-07	32	16	2	13:24:04	04:20:04	00:14:53	Lob	exit		T	1
2016-09-07	32	16	2	13:26:39	04:22:39	00:17:28	Lob	S_attempt		B	4
2016-09-07	32	16	2	13:27:33	04:23:33	00:18:22	Lob	exit		T	2
2016-09-07	32	16	2	13:28:40	04:24:40	00:19:29	Lob	S_attempt		T	25
2016-09-07	32	16	2	13:29:49	04:25:49	00:20:38	Lob	exit		T	1
2016-09-07	32	16	2	13:35:35	04:31:35	00:26:24	Lob	S_attempt		T	7
2016-09-07	32	16	2	13:39:38	04:35:38	00:30:27	Lob	exit		T	1
2016-09-07	32	16	2	15:03:06	05:59:06	00:07:46	Lob	S_attempt		T	2
2016-09-07	32	16	2	15:04:17	06:00:17	00:08:57	Lob	exit		T	2
2016-09-07	32	16	2	15:20:06	06:16:06	00:24:46	Lob	S_attempt		T	109
2016-09-07	32	16	2	15:25:03	06:21:03	00:29:43	Lob	S_attempt		T	6
2016-09-07	32	16	2	15:28:44	06:24:44	00:33:24	Lob	exit		T	2
2016-09-07	32	16	2	15:35:20	06:31:20	00:04:37	Lob	S_attempt		T	22
2016-09-07	32	16	2	15:36:13	06:32:13	00:05:30	Lob	exit		T	5
2016-09-07	32	16	2	15:45:53	06:41:53	00:15:10	Lob	S_attempt		T	25
2016-09-07	32	16	2	15:46:43	06:42:43	00:16:00	Lob	exit		T	2
2016-09-07	32	16	2	15:50:54	06:46:54	00:20:11	Lob	S_attempt		B	9
2016-09-07	32	16	2	15:53:56	06:49:56	00:23:13	Lob	S_attempt		B	12
2016-09-07	32	16	2	15:54:36	06:50:36	00:23:53	Lob	exit		T	5
2016-09-07	32	16	2	15:57:18	06:53:18	00:26:35	Lob	exit		T	1
2016-09-07	32	16	2	16:14:19	07:10:19	00:08:13	Lob	S_attempt		T	24
2016-09-07	32	16	2	16:17:50	07:13:50	00:11:44	Lob	exit		T	2
2016-09-07	32	16	2	16:21:52	07:17:52	00:15:46	Lob	S_attempt		T	42
2016-09-07	32	16	2	16:29:20	07:25:20	00:23:14	Lob	exit		T	3
2016-09-07	32	16	2	16:47:10	07:43:10	00:05:41	Lob	S_attempt		T	34
2016-09-07	32	16	2	16:48:12	07:44:12	00:06:43	Lob	exit		T	3
2016-09-07	32	16	2	18:50:11	09:46:11	00:22:33	Lob	S_attempt		T	1
2016-09-07	32	16	2	18:52:02	09:48:02	00:24:24	Lob	exit		B	1
2016-09-07	32	16	2	18:58:20	09:54:20	00:30:42	Lob	S_attempt		E	899
2016-09-07	32	16	2	19:46:07	10:42:07	00:07:43	Lob	end	3
2016-09-08	33	17	2	09:30:00	00:00:00	00:00:34	Lob	start
2016-09-08	33	17	2	09:46:06	00:16:06	00:16:40	Lob	S_attempt		E	23
2016-09-08	33	17	2	10:09:29	00:39:29	00:04:40	Lob	S_attempt		E	32
2016-09-08	33	17	2	10:16:21	00:46:21	00:11:32	Lob	S_attempt		T	4
2016-09-08	33	17	2	10:17:49	00:47:49	00:13:00	Lob	exit		B	6
2016-09-08	33	17	2	10:19:21	00:49:21	00:14:32	Lob	S_attempt		E	69
2016-09-08	33	17	2	10:35:34	01:05:34	00:30:45	Lob	S_attempt		E	37
2016-09-08	33	17	2	10:41:10	01:11:10	00:00:58	Lob	S_attempt		E	8
2016-09-08	33	17	2	10:44:28	01:14:28	00:04:16	Lob	exit		E	1
2016-09-08	33	17	2	10:55:00	01:25:00	00:14:48	Lob	S_attempt		E	109
2016-09-08	33	17	2	10:59:25	01:29:25	00:19:13	Lob	exit		B	1
2016-09-08	33	17	2	11:28:32	01:58:32	00:12:57	Lob	S_attempt		E	80
2016-09-08	33	17	2	11:30:45	02:00:45	00:15:10	Lob	S_attempt		E	13
2016-09-08	33	17	2	11:42:05	02:12:05	00:26:30	Lob	exit		B	5
2016-09-08	33	17	2	11:53:21	02:23:21	00:02:23	Lob	S_attempt		E	46
2016-09-08	33	17	2	12:27:00	02:57:00	00:00:39	Lob	S_attempt		E	151
2016-09-08	33	17	2	12:44:39	03:14:39	00:18:18	Lob	S_attempt		E	9
2016-09-08	33	17	2	13:06:08	03:36:08	00:04:24	Lob	S_attempt		T	7
2016-09-08	33	17	2	13:07:25	03:37:25	00:05:41	Lob	exit		B	2
2016-09-08	33	17	2	13:19:34	03:49:34	00:17:50	Lob	S_attempt		T	4
2016-09-08	33	17	2	13:22:26	03:52:26	00:20:42	Lob	exit		T	1
2016-09-08	33	17	2	13:45:02	04:15:02	00:07:55	Lob	S_attempt		E	15
2016-09-08	33	17	2	14:35:27	05:05:27	00:22:57	Lob	S_attempt		T	2
2016-09-08	33	17	2	14:36:36	05:06:36	00:24:06	Lob	exit		T	3
2016-09-08	33	17	2	14:45:05	05:15:05	00:32:35	Lob	S_attempt		T	5
2016-09-08	33	17	2	14:48:26	05:18:26	00:00:33	Lob	exit		T	12
2016-09-08	33	17	2	16:16:59	06:46:59	00:18:20	Lob	S_attempt		E	163
2016-09-08	33	17	2	19:23:37	09:53:37	00:28:03	Lob	end	5
2016-07-04	34	1	3	14:55:00	00:00:00	00:03:00	Lob	start
2016-07-04	34	1	3	15:37:31	00:42:31	00:10:22	Lob	S_attempt		E	20
2016-07-04	34	1	3	16:05:04	01:10:04	00:02:46	Lob	S_attempt		E	369
2016-07-04	34	1	3	16:05:16	01:10:16	00:02:58	Lob	exit		B	18
2016-07-04	34	1	3	16:16:28	01:21:28	00:14:10	Lob	S_attempt		E	13
2016-07-04	34	1	3	16:24:29	01:29:29	00:22:11	Lob	exit		B	3
2016-07-04	34	1	3	16:32:41	01:37:41	00:30:23	Lob	S_attempt		E	255
2016-07-04	34	1	3	17:06:29	02:11:29	00:29:02	Lob	S_attempt		E	70
2016-07-04	34	1	3	17:59:34	03:04:34	00:11:49	Lob	exit		B	8
2016-07-04	34	1	3	18:02:49	03:07:49	00:15:04	Lob	exit		B	1
2016-07-04	34	1	3	21:25:07	06:30:07	00:06:28	Lob	end	1
2016-07-05	35	2	3	08:25:00	00:00:00	00:01:00	Lob	start
2016-07-05	35	2	3	21:17:18	12:52:18	00:35:23	Lob	end	1
2016-07-06	36	3	3	09:25:00	00:00:00	00:03:00	Lob	start
2016-07-06	36	3	3	11:55:57	02:30:57	00:13:21	Lob	S_attempt		E	295
2016-07-06	36	3	3	13:16:36	03:51:36	00:23:42	Lob	S_attempt		E	255
2016-07-06	36	3	3	13:34:14	04:09:14	00:06:11	Lob	exit		B	1
2016-07-06	36	3	3	21:40:09	12:15:09	00:17:35	Lob	end	2
2016-07-07	37	4	3	09:28:00	00:00:00	00:01:00	Lob	start
2016-07-07	37	4	3	09:40:06	00:12:06	00:13:06	Lob	S_attempt		T	5
2016-07-07	37	4	3	09:40:16	00:12:16	00:13:16	Lob	exit		T	3
2016-07-07	37	4	3	09:48:26	00:20:26	00:21:26	Lob	S_attempt		E	61
2016-07-07	37	4	3	09:49:46	00:21:46	00:22:46	Lob	S_attempt		B	18
2016-07-07	37	4	3	09:54:41	00:26:41	00:27:41	Lob	S_attempt		B	3
2016-07-07	37	4	3	09:56:01	00:28:01	00:29:01	Lob	exit		B	40
2016-07-07	37	4	3	09:58:41	00:30:41	00:31:41	Lob	S_attempt		T	5
2016-07-07	37	4	3	09:59:57	00:31:57	00:32:57	Lob	exit		T	2
2016-07-07	37	4	3	10:00:45	00:32:45	00:33:45	Lob	S_attempt		E	36
2016-07-07	37	4	3	10:05:54	00:36:54	00:02:45	Lob	exit		B	8
2016-07-07	37	4	3	10:11:37	00:42:37	00:08:28	Lob	exit		B	5
2016-07-07	37	4	3	10:19:30	00:50:30	00:16:21	Lob	S_attempt		E	147
2016-07-07	37	4	3	10:30:31	01:01:31	00:27:22	Lob	exit		B	4
2016-07-07	37	4	3	10:47:00	01:18:00	00:08:42	Lob	S_attempt		E	54
2016-07-07	37	4	3	11:49:24	02:20:24	00:00:48	Lob	S_attempt		E	56
2016-07-07	37	4	3	12:20:52	02:51:52	00:32:16	Lob	S_attempt		E	185
2016-07-07	37	4	3	12:49:41	03:20:41	00:25:56	Lob	exit		B	3
2016-07-07	37	4	3	13:06:51	03:37:51	00:07:57	Lob	exit		B	8
2016-07-07	37	4	3	13:45:45	04:16:45	00:11:42	Lob	S_attempt		B	3
2016-07-07	37	4	3	13:51:39	04:22:39	00:17:36	Lob	S_attempt		E	148
2016-07-07	37	4	3	13:53:28	04:24:28	00:19:25	Lob	exit		B	1
2016-07-07	37	4	3	14:02:59	04:33:59	00:28:56	Lob	S_attempt		B	13
2016-07-07	37	4	3	14:07:06	04:38:06	00:33:03	Lob	exit		B	1
2016-07-07	37	4	3	14:07:53	04:38:53	00:33:50	Lob	S_attempt		B	2
2016-07-07	37	4	3	14:09:35	04:40:35	00:00:23	Lob	exit		B	5
2016-07-07	37	4	3	14:26:23	04:57:23	00:17:11	Lob	S_attempt		B	18
2016-07-07	37	4	3	14:26:49	04:57:49	00:17:37	Lob	exit		B	5
2016-07-07	37	4	3	14:38:52	05:09:52	00:29:40	Lob	S_attempt		E	17
2016-07-07	37	4	3	14:53:19	05:24:19	00:08:58	Lob	exit		T	8
2016-07-07	37	4	3	15:17:20	05:48:20	00:32:59	Lob	S_attempt		B	6
2016-07-07	37	4	3	15:18:48	05:49:48	00:34:27	Lob	exit		B	7
2016-07-07	37	4	3	15:30:22	06:01:22	00:10:52	Lob	S_attempt		E	7
2016-07-07	37	4	3	15:41:36	06:12:36	00:22:06	Lob	exit		B	7
2016-07-07	37	4	3	15:54:23	06:25:23	00:34:53	Lob	S_attempt		B	13
2016-07-07	37	4	3	16:36:29	07:07:29	00:06:41	Lob	S_attempt		B	51
2016-07-07	37	4	3	16:45:33	07:16:33	00:15:45	Lob	exit		T	3
2016-07-07	37	4	3	17:04:39	07:35:39	00:34:51	Lob	S_attempt		B	7
2016-07-07	37	4	3	17:11:25	07:42:25	00:06:28	Lob	exit		T	4
[truncated: 2,167 more rows]
