# Supplementary material for: A field-based investigation of behavioural interactions between invasive green crab (Carcinus maenas), rock crab (Cancer irroratus), and American lobster (Homarus americanus) in southern Newfoundland
Source: PeerJ. 2020 Feb 12;8:e8444. doi: 10.7717/peerj.8444 (PMC7023827; doi:10.7717/peerj.8444)
Supplement: Supplemental Information 7 [file peerj-08-8444-s016.xlsx]

## Sheet: trial video data stacked csv
Date	Deployment	Trap #	Time	elapsed time	video counter	Species	Behaviour	Direction	Time (s)	final catch
2016-07-04	1	1	14:45:00	00:00:00	00:01:00		start
2016-07-04	1	1	14:57:57	00:12:57	00:13:57	Lob	S_attempt	B	5
2016-07-04	1	1	14:58:18	00:13:18	00:14:18	Lob	feeding		36
2016-07-04	1	1	15:09:38	00:24:38	00:25:38	Lob	S_attempt	E	51
2016-07-04	1	1	15:11:37	00:26:37	00:27:37	Lob	feeding		187
2016-07-04	1	1	15:18:44	00:33:44	00:34:44	Lob	exit	T	5
2016-07-04	1	1	15:21:23	00:36:23	00:02:00	Lob	S_attempt	E	205
2016-07-04	1	1	15:24:58	00:39:58	00:05:35	Lob	feeding		206
2016-07-04	1	1	15:26:57	00:41:57	00:07:34	Lob	exit	B	2
2016-07-04	1	1	15:28:59	00:43:59	00:09:36	Lob	S_attempt	E	50
2016-07-04	1	1	15:30:26	00:45:26	00:11:03	Lob	feeding		63
2016-07-04	1	1	15:32:59	00:47:59	00:13:36	Lob	feeding		203
2016-07-04	1	1	15:35:32	00:50:32	00:16:09	Lob	S_attempt	E	26
2016-07-04	1	1	15:36:59	00:51:59	00:17:36	Lob	feeding		7
2016-07-04	1	1	15:38:40	00:53:40	00:19:17	Lob	exit	B	1
2016-07-04	1	1	15:39:00	00:54:00	00:19:37	Lob	F_attempt	E	76
2016-07-04	1	1	15:54:11	01:09:11	00:34:48	Lob	F_attempt	E	104
2016-07-04	1	1	15:56:51	01:11:51	00:02:05	Lob	F_attempt	E	268
2016-07-04	1	1	16:02:48	01:17:48	00:08:02	Lob	S_attempt	E	63
2016-07-04	1	1	16:03:59	01:18:59	00:09:13	Lob	feeding		190
2016-07-04	1	1	16:07:35	01:22:35	00:12:49	Lob	feeding		226
2016-07-04	1	1	16:10:46	01:25:46	00:16:00	Lob	F_attempt	E	9
2016-07-04	1	1	16:11:14	01:26:14	00:16:28	Lob	S_attempt	E	49
2016-07-04	1	1	16:15:52	01:30:52	00:21:06	Lob	exit	B	1
2016-07-04	1	1	16:15:58	01:30:58	00:21:12	Lob	S_attempt	E	46
2016-07-04	1	1	16:16:52	01:31:52	00:22:06	Lob	feeding		379
2016-07-04	1	1	16:18:50	01:33:50	00:24:04	Lob	exit	B	2
2016-07-04	1	1	16:23:04	01:38:04	00:28:18	Lob	F_attempt	E	48
2016-07-04	1	1	16:23:29	01:38:29	00:28:43	Lob	feeding		542
2016-07-04	1	1	16:25:19	01:40:19	00:30:33	Lob	F_attempt	E	60
2016-07-04	1	1	16:32:55	01:47:55	00:02:46	Lob	feeding		523
2016-07-04	1	1	16:41:27	01:56:27	00:11:18	Lob	F_attempt	E	25
2016-07-04	1	1	16:42:01	01:57:01	00:11:52	Lob	feeding		769
2016-07-04	1	1	16:44:44	01:59:44	00:14:35	Lob	F_attempt	E	13
2016-07-04	1	1	16:45:20	02:00:20	00:15:11	Lob	F_attempt	E	48
2016-07-04	1	1	16:55:39	02:10:39	00:25:30	Lob	feeding		27
2016-07-04	1	1	16:56:02	02:11:02	00:25:53	Lob	F_attempt	E	35
2016-07-04	1	1	16:57:10	02:12:10	00:27:01	Lob	F_attempt	E	42
2016-07-04	1	1	16:58:05	02:13:05	00:27:56	Lob	feeding		304
2016-07-04	1	1	17:03:10	02:18:10	00:33:01	Lob	S_attempt	E	28
2016-07-04	1	1	17:03:51	02:18:51	00:33:42	Lob	exit	E	1
2016-07-04	1	1	17:04:58	02:19:58	00:34:49	Lob	F_attempt	E	655
2016-07-04	1	1	17:07:36	02:22:36	00:02:04	Lob	exit	B	2
2016-07-04	1	1	17:21:46	02:36:46	00:16:14	Lob	F_attempt	E	225
2016-07-04	1	1	17:31:22	02:46:22	00:25:50	Lob	F_attempt	E	82
2016-07-04	1	1	17:39:45	02:54:45	00:34:13	Lob	F_attempt	E	237
2016-07-04	1	1	17:49:10	03:04:10	00:08:15	Lob	F_attempt	E	171
2016-07-04	1	1	17:56:17	03:11:17	00:15:22	Lob	F_attempt	E	142
2016-07-04	1	1	18:24:30	03:39:30	00:08:12	Lob	F_attempt	E	38
2016-07-04	1	1	18:43:16	03:58:16	00:26:58	Lob	F_attempt	E	57
2016-07-04	1	1	18:44:53	03:59:53	00:28:35	Lob	F_attempt	E	66
2016-07-04	1	1	18:46:40	04:01:40	00:30:22	Lob	F_attempt	E	327
2016-07-04	1	1	19:04:03	04:19:03	00:12:22	Lob	F_attempt	E	40
2016-07-04	1	1	19:32:06	04:47:06	00:05:02	Lob	F_attempt	E	155
2016-07-04	1	1	19:35:46	04:50:46	00:08:42	Lob	F_attempt	E	40
2016-07-04	1	1	19:50:50	05:05:50	00:23:46	Lob	F_attempt	E	61
2016-07-04	1	1	19:55:20	05:10:20	00:28:16	Lob	F_attempt	E	44
2016-07-04	1	1	21:12:03	06:27:03	00:34:13	Lob	F_attempt	E	134
2016-07-04	1	1	21:15:13	06:30:13	00:02:00		end			2
2016-07-06	3	1	09:17:00	00:00:00	00:01:00		start
2016-07-06	3	1	09:18:39	00:01:39	00:02:39	GC	F_attempt	E	136
2016-07-06	3	1	09:25:22	00:08:22	00:09:22	GC	S_attempt	B	1
2016-07-06	3	1	09:27:33	00:10:33	00:11:33	GC	S_attempt	B	2
2016-07-06	3	1	09:28:50	00:11:50	00:12:50	GC	feeding		1443
2016-07-06	3	1	09:30:34	00:13:34	00:14:34	GC	exit	B	3
2016-07-06	3	1	09:31:25	00:14:25	00:15:25	GC	S_attempt	B	1
2016-07-06	3	1	09:34:10	00:17:10	00:18:10	GC	feeding		567
2016-07-06	3	1	09:36:04	00:19:04	00:20:04	GC	exit	B	2
2016-07-06	3	1	09:37:41	00:20:41	00:21:41	GC	S_attempt	B	1
2016-07-06	3	1	09:37:51	00:20:51	00:21:51	GC	exit	B	2
2016-07-06	3	1	09:38:27	00:21:27	00:22:27	GC	S_attempt	T	10
2016-07-06	3	1	09:38:33	00:21:33	00:22:33	GC	exit	B	1
2016-07-06	3	1	09:40:22	00:23:22	00:24:22	GC	exit	T	4
2016-07-06	3	1	09:41:36	00:24:36	00:25:36	GC	F_attempt	E	9
2016-07-06	3	1	09:42:38	00:25:38	00:26:38	GC	S_attempt	T	1
2016-07-06	3	1	09:43:29	00:26:29	00:27:29	GC	exit	T	1
2016-07-06	3	1	09:44:56	00:27:56	00:28:56	GC	feeding		1023
2016-07-06	3	1	09:48:13	00:31:13	00:32:13	GC	S_attempt	P	4
2016-07-06	3	1	09:48:35	00:31:35	00:32:35	GC	exit	T	2
2016-07-06	3	1	09:50:37	00:33:37	00:34:37	GC	S_attempt	T	2
2016-07-06	3	1	09:51:27	00:34:27	00:00:04	GC	S_attempt	T	2
2016-07-06	3	1	09:52:30	00:35:30	00:01:07	GC	S_attempt	P	1
2016-07-06	3	1	09:52:49	00:35:49	00:01:26	GC	exit	P	1
2016-07-06	3	1	09:55:24	00:38:24	00:04:01	GC	S_attempt	T	3
2016-07-06	3	1	09:56:16	00:39:16	00:04:53	GC	exit	K	1
2016-07-06	3	1	09:56:45	00:39:45	00:05:22	GC	exit	B	10
2016-07-06	3	1	09:59:54	00:42:54	00:08:31	GC	F_attempt	E	22
2016-07-06	3	1	10:00:54	00:43:54	00:09:31	GC	S_attempt	T	21
2016-07-06	3	1	10:01:41	00:44:41	00:10:18	GC	feeding		410
2016-07-06	3	1	10:02:19	00:45:19	00:10:56	GC	exit	T	19
2016-07-06	3	1	10:08:08	00:51:08	00:16:45	GC	F_attempt	E	56
2016-07-06	3	1	10:13:14	00:56:14	00:21:51	GC	feeding		120
2016-07-06	3	1	10:15:05	00:58:05	00:23:42	Lob	S_attempt	E	101
2016-07-06	3	1	10:16:51	00:59:51	00:25:28	Lob	feeding		98
2016-07-06	3	1	10:17:37	01:00:37	00:26:14	Lob	F_attempt	E	174
2016-07-06	3	1	10:19:12	01:02:12	00:27:49	Lob	feeding		9
2016-07-06	3	1	10:22:48	01:05:48	00:31:25	Lob	feeding		2
2016-07-06	3	1	10:23:20	01:06:20	00:31:57	Lob	feeding		118
2016-07-06	3	1	10:25:40	01:08:40	00:34:17	Lob	feeding		365
2016-07-06	3	1	10:30:15	01:13:15	00:03:29	Lob	F_attempt	E	42
2016-07-06	3	1	10:32:06	01:15:06	00:05:20	Lob	feeding		7
2016-07-06	3	1	10:32:42	01:15:42	00:05:56	Lob	feeding		80
2016-07-06	3	1	10:35:23	01:18:23	00:08:37	Lob	F_attempt	E	19
2016-07-06	3	1	10:35:56	01:18:56	00:09:10	Lob	feeding		60
2016-07-06	3	1	10:37:14	01:20:14	00:10:28	Lob	feeding		80
2016-07-06	3	1	10:39:59	01:22:59	00:13:13	Lob	feeding		130
2016-07-06	3	1	10:43:46	01:26:46	00:17:00	Lob	feeding		12
2016-07-06	3	1	10:43:51	01:26:51	00:17:05	Lob	F_attempt	E	487
2016-07-06	3	1	10:44:46	01:27:46	00:18:00	Lob	feeding		9
2016-07-06	3	1	10:46:20	01:29:20	00:19:34	Lob	feeding		79
2016-07-06	3	1	10:49:07	01:32:07	00:22:21	Lob	feeding		244
2016-07-06	3	1	10:54:49	01:37:49	00:28:03	Lob	feeding		5
2016-07-06	3	1	10:55:20	01:38:20	00:28:34	Lob	feeding		6
2016-07-06	3	1	10:56:38	01:39:38	00:29:52	Lob	feeding		33
2016-07-06	3	1	10:57:47	01:40:47	00:31:01	Lob	feeding		340
2016-07-06	3	1	11:05:00	01:48:00	00:02:51	Lob	feeding		76
2016-07-06	3	1	11:07:04	01:50:04	00:04:55	Lob	feeding		116
2016-07-06	3	1	11:07:30	01:50:30	00:05:21	Lob	F_attempt	E	1
2016-07-06	3	1	11:07:53	01:50:53	00:05:44	Lob	F_attempt	E	51
2016-07-06	3	1	11:10:52	01:53:52	00:08:43	Lob	feeding		147
2016-07-06	3	1	11:13:52	01:56:52	00:11:43	Lob	feeding		74
2016-07-06	3	1	11:15:05	01:58:05	00:12:56	Lob	feeding		8
2016-07-06	3	1	11:16:11	01:59:11	00:14:02	Lob	feeding		38
2016-07-06	3	1	11:17:20	02:00:20	00:15:11	Lob	feeding		71
2016-07-06	3	1	11:18:43	02:01:43	00:16:34	Lob	feeding		102
2016-07-06	3	1	11:20:28	02:03:28	00:18:19	GC-Lob	aggression		16
2016-07-06	3	1	11:21:04	02:04:04	00:18:55	Lob	feeding		85
2016-07-06	3	1	11:23:54	02:06:54	00:21:45	Lob	feeding		10
2016-07-06	3	1	11:25:02	02:08:02	00:22:53	Lob	feeding		43
2016-07-06	3	1	11:26:11	02:09:11	00:24:02	Lob	feeding		4
2016-07-06	3	1	11:26:48	02:09:48	00:24:39	Lob	feeding		165
2016-07-06	3	1	11:29:18	02:12:18	00:27:09	Lob	F_attempt	E	1707
2016-07-06	3	1	11:30:42	02:13:42	00:28:33	Lob	feeding		19
2016-07-06	3	1	11:32:45	02:15:45	00:30:36	Lob	feeding		125
2016-07-06	3	1	11:37:33	02:20:33	00:00:01	Lob	feeding		120
2016-07-06	3	1	11:42:38	02:25:38	00:05:06	GC	S_attempt	P	1
2016-07-06	3	1	11:42:42	02:25:42	00:05:10	DIVE	DIVE
2016-07-06	3	1	11:42:48	02:25:48	00:05:16	Lob	exit	B	2
2016-07-06	3	1	11:59:53	02:42:53	00:22:21	Lob	S_attempt	E	28
2016-07-06	3	1	12:00:28	02:43:28	00:22:56	Lob	feeding		136
2016-07-06	3	1	12:03:42	02:46:42	00:26:10	Lob	feeding		319
2016-07-06	3	1	12:09:51	02:52:51	00:32:19	DIVE	DIVE
2016-07-06	3	1	12:33:32	03:16:32	00:20:37	Lob	feeding		33
2016-07-06	3	1	13:32:23	04:15:23	00:08:42	Lob	exit	B	3
2016-07-06	3	1	14:34:34	05:17:34	00:00:07	GC	feeding		469
2016-07-06	3	1	14:42:12	05:25:12	00:07:45	Lob	F_attempt	E	133
2016-07-06	3	1	14:58:22	05:41:22	00:23:55	GC	feeding		286
2016-07-06	3	1	15:18:20	06:01:20	00:08:30	Lob	F_attempt	E	121
2016-07-06	3	1	15:38:47	06:21:47	00:28:57	GC	feeding		492
2016-07-06	3	1	17:48:12	08:31:12	00:16:50	MISC	MISC
2016-07-06	3	1	17:56:18	08:39:18	00:24:56	GC	feeding		608
2016-07-06	3	1	18:24:37	09:07:37	00:17:52	GC	feeding		1687
2016-07-06	3	1	20:04:33	10:47:33	00:11:39	Lob	S_attempt	E	624
2016-07-06	3	1	20:15:10	10:58:10	00:22:16	Lob	feeding		123
2016-07-06	3	1	20:18:54	11:01:54	00:26:00	Lob	feeding		32
2016-07-06	3	1	20:20:00	11:03:00	00:27:06	Lob	feeding		203
2016-07-06	3	1	20:25:32	11:08:32	00:32:38	Lob	feeding		50
2016-07-06	3	1	20:26:38	11:09:38	00:33:44	Lob	feeding		260
2016-07-06	3	1	20:31:39	11:14:39	00:03:22	GC-Lob	aggression		5124
2016-07-06	3	1	20:42:33	11:25:33	00:14:16	Lob	exit	B	7
2016-07-06	3	1	20:50:22	11:33:22	00:22:05	Lob	S_attempt	B	1
2016-07-06	3	1	20:51:44	11:34:44	00:23:27	Lob	exit	B	1
2016-07-06	3	1	21:21:40	12:04:40	00:18:00		end			3
2016-07-07	4	1	09:25:00	00:00:00	00:01:00		start
2016-07-07	4	1	09:38:16	00:13:16	00:14:16	Lob	S_attempt	E	76
2016-07-07	4	1	09:39:36	00:14:36	00:15:36	Lob	exit	E	1
2016-07-07	4	1	09:47:26	00:22:26	00:23:26	GC	feeding		753
2016-07-07	4	1	09:55:53	00:30:53	00:31:53	Lob	S_attempt	E	156
2016-07-07	4	1	09:58:59	00:33:59	00:34:59	Lob	F_attempt	E	24
2016-07-07	4	1	09:59:32	00:34:32	00:00:09	Lob	feeding		18
2016-07-07	4	1	10:01:43	00:36:43	00:02:20	Lob	S_attempt	E	84
2016-07-07	4	1	10:07:10	00:42:10	00:07:47	Lob	F_attempt	E	355
2016-07-07	4	1	10:10:01	00:45:01	00:10:38	GC	feeding		267
2016-07-07	4	1	10:22:39	00:57:39	00:23:16	Lob	S_attempt	E	136
2016-07-07	4	1	10:24:52	00:59:52	00:25:29	Lob	S_attempt	E	385
2016-07-07	4	1	10:26:09	01:01:09	00:26:46	GC-Lob	aggression		12
2016-07-07	4	1	10:33:04	01:08:04	00:33:41	Lob	feeding		102
2016-07-07	4	1	10:49:59	01:24:59	00:15:13	Lob	F_attempt	E	63
2016-07-07	4	1	10:51:13	01:26:13	00:16:27	Lob	S_attempt	E	68
2016-07-07	4	1	10:52:36	01:27:36	00:17:50	Lob	feeding		454
2016-07-07	4	1	10:57:28	01:32:28	00:22:42	DIVE	DIVE
2016-07-07	4	1	11:00:39	01:35:39	00:25:53	Lob	feeding		432
2016-07-07	4	1	11:08:15	01:43:15	00:33:29	Lob	feeding		281
2016-07-07	4	1	11:12:47	01:47:47	00:02:38	Lob	S_attempt	E	44
2016-07-07	4	1	11:13:52	01:48:52	00:03:43	Lob	feeding		143
2016-07-07	4	1	11:14:44	01:49:44	00:04:35	Lob	exit	B	5
2016-07-07	4	1	11:16:55	01:51:55	00:06:46	Lob	feeding		50
2016-07-07	4	1	11:18:40	01:53:40	00:08:31	Lob	feeding		101
2016-07-07	4	1	11:22:59	01:57:59	00:12:50	DIVE	DIVE
2016-07-07	4	1	11:24:15	01:59:15	00:14:06	Lob	feeding		128
2016-07-07	4	1	11:26:39	02:01:39	00:16:30	Lob	feeding		376
2016-07-07	4	1	11:33:09	02:08:09	00:23:00	Lob	feeding		194
2016-07-07	4	1	11:37:16	02:12:16	00:27:07	Lob	feeding		129
2016-07-07	4	1	11:40:46	02:15:46	00:30:37	Lob	feeding		93
2016-07-07	4	1	11:43:35	02:18:35	00:33:26	Lob	feeding		24
2016-07-07	4	1	12:05:30	02:40:30	00:19:58	Lob	S_attempt	E	13
2016-07-07	4	1	12:06:04	02:41:04	00:20:32	Lob	feeding		24
2016-07-07	4	1	12:07:11	02:42:11	00:21:39	Lob	feeding		75
2016-07-07	4	1	12:08:58	02:43:58	00:23:26	Lob	feeding		44
2016-07-07	4	1	12:10:26	02:45:26	00:24:54	Lob	feeding		102
2016-07-07	4	1	12:13:14	02:48:14	00:27:42	Lob	feeding		160
2016-07-07	4	1	12:16:07	02:51:07	00:30:35	Lob	feeding		340
2016-07-07	4	1	12:22:33	02:57:33	00:01:38	Lob	feeding		135
2016-07-07	4	1	12:25:07	03:00:07	00:04:12	Lob	feeding		64
2016-07-07	4	1	12:30:37	03:05:37	00:09:42	GC-Lob	aggression		14
2016-07-07	4	1	12:37:48	03:12:48	00:16:53	GC	feeding		283
2016-07-07	4	1	12:43:40	03:18:40	00:22:45	Lob	exit	B	3
2016-07-07	4	1	13:53:51	04:28:51	00:22:10	GC	feeding		105
2016-07-07	4	1	14:14:41	04:49:41	00:07:37	Lob	S_attempt	E	192
2016-07-07	4	1	15:15:14	05:50:14	00:32:47	GC	feeding		1534
2016-07-07	4	1	15:57:31	06:32:31	00:04:18	GC	feeding		1201
2016-07-07	4	1	16:16:33	06:51:33	00:23:20	Lob	S_attempt	E	190
2016-07-07	4	1	16:20:08	06:55:08	00:26:55	Lob	feeding		83
2016-07-07	4	1	16:21:43	06:56:43	00:28:30	Lob	feeding		333
2016-07-07	4	1	16:27:35	07:02:35	00:34:22	Lob	feeding		77
2016-07-07	4	1	16:28:48	07:03:48	00:00:12	GC-Lob	aggression		5
2016-07-07	4	1	16:30:44	07:05:44	00:02:08	Lob	feeding		194
2016-07-07	4	1	16:34:03	07:09:03	00:05:27	Lob	exit	E	1
2016-07-07	4	1	16:52:37	07:27:37	00:24:01	Lob	S_attempt	E	298
2016-07-07	4	1	16:57:47	07:32:47	00:29:11	Lob	feeding		49
2016-07-07	4	1	17:00:19	07:35:19	00:31:43	Lob	exit	E	39
2016-07-07	4	1	17:00:56	07:35:56	00:32:20	GC	feeding		1387
2016-07-07	4	1	17:14:38	07:49:38	00:10:39	GC	feeding		996
2016-07-07	4	1	17:27:50	08:02:50	00:23:51	Lob	F_attempt	E	2892
2016-07-07	4	1	17:42:12	08:17:12	00:02:50	GC-Lob	aggression		36
2016-07-07	4	1	08:51:15	08:51:15	00:01:30	Lob	feeding		44
2016-07-07	4	1	08:58:24	08:58:24	00:08:39	Lob	feeding		1091
2016-07-07	4	1	09:16:15	09:16:15	00:26:30	Lob	F_attempt	E	90
2016-07-07	4	1	09:22:06	09:22:06	00:32:21	Lob	F_attempt	E	41
2016-07-07	4	1	09:22:30	09:22:30	00:32:45	Lob	feeding		879
2016-07-07	4	1	19:02:27	09:37:27	00:12:19	Lob	feeding		513
2016-07-07	4	1	19:12:59	09:47:59	00:22:51	Lob	F_attempt	E	141
2016-07-07	4	1	19:17:00	09:52:00	00:26:52	Lob	F_attempt	E	355
2016-07-07	4	1	19:24:40	09:59:40	00:34:32	Lob	F_attempt	E	184
2016-07-07	4	1	19:32:26	10:07:26	00:06:55	Lob	feeding		168
2016-07-07	4	1	19:39:33	10:14:33	00:14:02	Lob	F_attempt	E	397
2016-07-07	4	1	19:42:03	10:17:03	00:16:32	GC-Lob	aggression		11
2016-07-07	4	1	19:42:26	10:17:26	00:16:55	GC-Lob	aggression		86
2016-07-07	4	1	19:44:26	10:19:26	00:18:55	GC-Lob	aggression		103
2016-07-07	4	1	19:46:09	10:21:09	00:20:38	Lob	F_attempt	E	32
2016-07-07	4	1	19:47:54	10:22:54	00:22:23	Lob	F_attempt	E	221
2016-07-07	4	1	19:48:28	10:23:28	00:22:57	GC-Lob	aggression		187
2016-07-07	4	1	19:51:19	10:26:19	00:25:48	Lob	F_attempt	E	18
2016-07-07	4	1	19:51:46	10:26:46	00:26:15	Lob	F_attempt	E	452
2016-07-07	4	1	19:52:14	10:27:14	00:26:43	GC-Lob	aggression		401
2016-07-07	4	1	19:59:36	10:34:36	00:34:05	Lob	F_attempt	E	905
2016-07-07	4	1	20:00:18	10:35:18	00:34:47	GC-Lob	aggression		140
2016-07-07	4	1	20:03:57	10:38:57	00:03:03	GC-Lob	aggression		643
2016-07-07	4	1	20:14:40	10:49:40	00:13:46	Lob	F_attempt	E	1
2016-07-07	4	1	20:15:36	10:50:36	00:14:42	Lob	F_attempt	E	144
2016-07-07	4	1	20:15:47	10:50:47	00:14:53	GC-Lob	aggression		133
2016-07-07	4	1	20:17:44	10:52:44	00:16:50	Lob	S_attempt	E	37
2016-07-07	4	1	20:18:18	10:53:18	00:17:24	Lob	F_attempt	E	1080
2016-07-07	4	1	20:18:19	10:53:19	00:17:25	GC-Lob	aggression		3
2016-07-07	4	1	20:18:39	10:53:39	00:17:45	GC-Lob	aggression		242
2016-07-07	4	1	20:26:09	11:01:09	00:25:15	GC-Lob	aggression		129
2016-07-07	4	1	20:29:22	11:04:22	00:28:28	GC-Lob	aggression		341
2016-07-07	4	1	20:50:29	11:25:29	00:14:12	Lob	F_attempt	E	288
2016-07-07	4	1	20:51:15	11:26:15	00:14:58	GC-Lob	aggression		242
2016-07-07	4	1	20:55:22	11:30:22	00:19:05	Lob	F_attempt	E	43
2016-07-07	4	1	20:55:31	11:30:31	00:19:14	GC-Lob	aggression		50
2016-07-07	4	1	20:56:28	11:31:28	00:20:11	GC-Lob	aggression		23
2016-07-07	4	1	21:21:20	11:56:20	00:09:40		end			7
2016-07-18	5	1	16:34:00	00:00:00	00:21:52		start
2016-07-18	5	1	16:48:31	00:14:31	00:01:00	GC	feeding		998
2016-07-18	5	1	16:56:15	00:22:15	00:08:44	GC	S_attempt	E	61
2016-07-18	5	1	17:00:58	00:26:58	00:13:27	GC	feeding		2249
2016-07-18	5	1	17:07:03	00:33:03	00:19:32	GC	feeding		486
2016-07-18	5	1	17:07:46	00:33:46	00:20:15	RC	S_attempt	B	1
2016-07-18	5	1	17:16:23	00:42:23	00:28:52	GC	feeding		1269
2016-07-18	5	1	17:18:53	00:44:53	00:31:22	RC	exit	B	3
2016-07-18	5	1	17:19:28	00:45:28	00:31:57	RC	S_attempt	B	3
2016-07-18	5	1	17:38:56	01:04:56	00:16:02	GC	feeding		221
2016-07-18	5	1	17:44:23	01:10:23	00:21:29	GC	feeding		2880
2016-07-18	5	1	17:46:07	01:12:07	00:23:13	GC	feeding		198
2016-07-18	5	1	17:50:12	01:16:12	00:27:18	GC	feeding		2660
2016-07-18	5	1	18:04:41	01:30:41	00:06:24	RC	exit	T	5
2016-07-18	5	1	18:05:01	01:31:01	00:06:44	RC	S_attempt	T	2
2016-07-18	5	1	18:11:32	01:37:32	00:13:15	RC	exit	T	8
2016-07-18	5	1	18:12:36	01:38:36	00:14:19	RC	S_attempt	T	20
2016-07-18	5	1	18:20:20	01:46:20	00:22:03	RC	exit	T	1
2016-07-18	5	1	18:32:48	01:58:48	00:34:31	GC	feeding		2029
2016-07-18	5	1	18:53:39	02:19:39	00:19:59	GC	S_attempt	B	1
2016-07-18	5	1	18:55:20	02:21:20	00:21:40	GC	exit	B	2
2016-07-18	5	1	18:58:21	02:24:21	00:24:41	GC	S_attempt	B	1
2016-07-18	5	1	19:01:36	02:27:36	00:27:56	GC	feeding		781
2016-07-18	5	1	19:02:10	02:28:10	00:28:30	GC	feeding		439
2016-07-18	5	1	19:04:33	02:30:33	00:30:53	GC	S_attempt	E	115
2016-07-18	5	1	19:06:37	02:32:37	00:32:57	GC	feeding		479
2016-07-18	5	1	19:06:51	02:32:51	00:33:11	RC	S_attempt	E	10
2016-07-18	5	1	19:17:26	02:43:26	00:08:23	RC	feeding		1845
2016-07-18	5	1	19:17:42	02:43:42	00:08:39	GC	feeding		608
2016-07-18	5	1	19:30:59	02:56:59	00:21:56	GC	exit	T	8
2016-07-18	5	1	19:43:15	03:09:15	00:34:12	GC	S_attempt	B	1
2016-07-18	5	1	19:43:30	03:09:30	00:34:27	GC	feeding		257
2016-07-18	5	1	19:43:37	03:09:37	00:34:34	GC	feeding		97
2016-07-18	5	1	19:47:30	03:13:30	00:03:04	GC	feeding		1520
2016-07-18	5	1	20:09:44	03:35:44	00:25:18	GC	S_attempt	B	4
2016-07-18	5	1	20:12:46	03:38:46	00:28:20	GC	feeding		724
2016-07-18	5	1	20:13:16	03:39:16	00:28:50	GC	feeding		3729
2016-07-18	5	1	20:17:28	03:43:28	00:33:02	GC	exit	B	4
2016-07-18	5	1	20:26:24	03:52:24	00:06:35	RC	S_attempt	T	3
2016-07-18	5	1	20:30:12	03:56:12	00:10:23	GC	feeding		1663
2016-07-18	5	1	20:31:33	03:57:33	00:11:44	RC	exit	T	6
2016-07-18	5	1	20:40:25	04:06:25	00:20:36	GC	F_attempt	B	90
2016-07-18	5	1	20:40:38	04:06:38	00:20:49	GC	feeding		1079
2016-07-18	5	1	21:15:35	04:41:35	00:20:23		end			0
2016-07-19	6	1	19:25:00	00:00:00	00:16:30		start
2016-07-19	6	1	19:42:15	00:17:15	00:33:45	GC	F_attempt	E	2
2016-07-19	6	1	20:10:18	00:45:18	00:26:25	GC	S_attempt	B	2
2016-07-19	6	1	20:11:08	00:46:08	00:27:15	GC	feeding		1297
2016-07-19	6	1	21:01:02	01:36:02	00:06:23	Lob	F_attempt	E	7
2016-07-19	6	1	21:14:39	01:49:39	00:20:00	DARK	DARK
2016-07-19	6	1	07:04:40	09:50:01	00:05:00	DARK	DARK
2016-07-19	6	1	07:35:56	10:21:17	00:00:53	GC	feeding		764
2016-07-19	6	1	08:17:12	11:02:33	00:06:46	RC	S_attempt	T	3
2016-07-19	6	1	08:25:43	11:11:04	00:15:17	GC	feeding		736
2016-07-19	6	1	08:43:32	11:28:53	00:33:06	RC	feeding		1417
2016-07-19	6	1	09:05:25	11:50:46	00:19:36	GC	feeding		324
2016-07-19	6	1	09:22:49	12:08:10	00:01:37	GC	feeding		408
2016-07-19	6	1	09:37:31	12:22:52	00:16:19	Lob	F_attempt	E	17
2016-07-19	6	1	09:48:55	12:34:16	00:27:43	GC	feeding		4
2016-07-19	6	1	09:59:06	12:44:27	00:02:31		end			0
2016-08-08	7	1	14:41:00	00:00:00	00:01:00		start
2016-08-08	7	1	15:09:32	00:28:32	00:29:32	Lob	S_attempt	T	8
2016-08-08	7	1	15:10:48	00:29:48	00:30:48	Lob	feeding		8
2016-08-08	7	1	15:13:12	00:32:12	00:33:12	Lob	exit	B	6
2016-08-08	7	1	15:13:33	00:32:33	00:33:33	Lob	S_attempt	B	3
2016-08-08	7	1	15:13:51	00:32:51	00:33:51	Lob	S_attempt	T	10
2016-08-08	7	1	15:14:28	00:33:28	00:34:28	Lob	exit	T	3
2016-08-08	7	1	15:14:40	00:33:40	00:34:40	Lob	exit	T	7
2016-08-08	7	1	15:16:12	00:35:12	00:00:49	Lob	S_attempt	B	10
2016-08-08	7	1	15:17:33	00:36:33	00:02:10	Lob	exit	T	1
2016-08-08	7	1	15:18:28	00:37:28	00:03:05	Lob	F_attempt	E	83
2016-08-08	7	1	15:19:57	00:38:57	00:04:34	Lob	S_attempt	T	2
2016-08-08	7	1	15:20:16	00:39:16	00:04:53	Lob	S_attempt	T	6
2016-08-08	7	1	15:20:34	00:39:34	00:05:11	Lob	exit	B	1
2016-08-08	7	1	15:22:54	00:41:54	00:07:31	Lob	exit	B	3
2016-08-08	7	1	15:29:52	00:48:52	00:14:29	Lob	S_attempt	E	349
2016-08-08	7	1	15:30:18	00:49:18	00:14:55	Lob	S_attempt	T	9
2016-08-08	7	1	15:31:11	00:50:11	00:15:48	Lob	exit	T	2
2016-08-08	7	1	15:35:53	00:54:53	00:20:30	Lob	feeding		320
2016-08-08	7	1	15:38:06	00:57:06	00:22:43	Lob	S_attempt	B	4
2016-08-08	7	1	15:40:40	00:59:40	00:25:17	Lob	exit	B	1
2016-08-08	7	1	15:42:02	01:01:02	00:26:39	Lob	feeding		35
2016-08-08	7	1	15:43:00	01:02:00	00:27:37	GC-Lob	aggression		40
2016-08-08	7	1	15:43:01	01:02:01	00:27:38	Lob	S_attempt	B	2
2016-08-08	7	1	15:43:48	01:02:48	00:28:25	Lob	feeding		8
2016-08-08	7	1	15:43:56	01:02:56	00:28:33	GC-Lob	aggression		63
2016-08-08	7	1	15:46:02	01:05:02	00:30:39	Lob	feeding		102
2016-08-08	7	1	15:47:41	01:06:41	00:32:18	Lob	exit	B	3
2016-08-08	7	1	15:48:12	01:07:12	00:32:49	Lob	exit	E	1
2016-08-08	7	1	15:49:57	01:08:57	00:34:34	Lob	F_attempt	B	3
2016-08-08	7	1	15:50:48	01:09:48	00:00:02	Lob	F_attempt	B	7
2016-08-08	7	1	15:51:00	01:10:00	00:00:14	Lob	S_attempt	B	4
2016-08-08	7	1	15:51:17	01:10:17	00:00:31	Lob	feeding		106
2016-08-08	7	1	15:52:20	01:11:20	00:01:34	Lob	S_attempt	T	3
2016-08-08	7	1	15:52:41	01:11:41	00:01:55	Lob	exit	B	5
2016-08-08	7	1	15:54:10	01:13:10	00:03:24	Lob	feeding		15
2016-08-08	7	1	15:54:26	01:13:26	00:03:40	Lob	exit	B	1
2016-08-08	7	1	16:00:32	01:19:32	00:09:46	Lob	F_attempt	E	90
2016-08-08	7	1	16:00:57	01:19:57	00:10:11	Lob	S_attempt	B	5
2016-08-08	7	1	16:01:30	01:20:30	00:10:44	Lob	exit	B	1
2016-08-08	7	1	16:03:00	01:22:00	00:12:14	Lob	S_attempt	B	6
2016-08-08	7	1	16:04:15	01:23:15	00:13:29	Lob	F_attempt	E	364
2016-08-08	7	1	16:05:31	01:24:31	00:14:45	Lob	exit	B	1
2016-08-08	7	1	16:06:01	01:25:01	00:15:15	Lob	S_attempt	B	3
2016-08-08	7	1	16:07:25	01:26:25	00:16:39	Lob	exit	T	2
2016-08-08	7	1	16:12:09	01:31:09	00:21:23	Lob	S_attempt	T	1
2016-08-08	7	1	16:12:17	01:31:17	00:21:31	Lob	exit	T	1
2016-08-08	7	1	16:14:57	01:33:57	00:24:11	GC-Lob	aggression		11
2016-08-08	7	1	16:15:13	01:34:13	00:24:27	Lob	F_attempt	E	270
2016-08-08	7	1	16:15:11	01:34:11	00:24:25	Lob	S_attempt	B	20
2016-08-08	7	1	16:16:14	01:35:14	00:25:28	Lob	exit	B	2
2016-08-08	7	1	16:17:32	01:36:32	00:26:46	GC-Lob	aggression		14
2016-08-08	7	1	16:21:01	01:40:01	00:30:15	Lob	F_attempt	E	33
2016-08-08	7	1	16:22:30	01:41:30	00:31:44	Lob	F_attempt	E	126
2016-08-08	7	1	16:22:31	01:41:31	00:31:45	Lob	F_attempt	T	7
2016-08-08	7	1	16:23:09	01:42:09	00:32:23	Lob	S_attempt	T	6
2016-08-08	7	1	16:23:18	01:42:18	00:32:32	Lob	exit	T	2
2016-08-08	7	1	16:27:57	01:46:57	00:01:48	Lob	F_attempt	E	225
2016-08-08	7	1	16:29:12	01:48:12	00:03:03	Lob	S_attempt	B	4
2016-08-08	7	1	16:30:51	01:49:51	00:04:42	Lob	exit	B	7
2016-08-08	7	1	16:31:50	01:50:50	00:05:41	Lob	F_attempt	E	44
2016-08-08	7	1	16:35:05	01:54:05	00:08:56	Lob	S_attempt	E	37
2016-08-08	7	1	16:35:05	01:54:05	00:08:56	Lob	S_attempt	B	5
2016-08-08	7	1	16:35:31	01:54:31	00:09:22	Lob	exit	B	2
2016-08-08	7	1	16:35:50	01:54:50	00:09:41	Lob	exit	E	194
2016-08-08	7	1	16:39:14	01:58:14	00:13:05	Lob	F_attempt	E	168
2016-08-08	7	1	16:40:28	01:59:28	00:14:19	Lob	S_attempt	B	6
2016-08-08	7	1	16:40:38	01:59:38	00:14:29	Lob	exit	B	2
2016-08-08	7	1	16:42:31	02:01:31	00:16:22	Lob	F_attempt	E	143
2016-08-08	7	1	16:47:21	02:06:21	00:21:12	Lob	F_attempt	E	123
2016-08-08	7	1	16:49:29	02:08:29	00:23:20	Lob	S_attempt	E	24
2016-08-08	7	1	16:49:52	02:08:52	00:23:43	Lob	F_attempt	E	47
2016-08-08	7	1	16:51:47	02:10:47	00:25:38	Lob	F_attempt	E	131
2016-08-08	7	1	16:55:25	02:14:25	00:29:16	Lob	F_attempt	E	230
2016-08-08	7	1	16:57:56	02:16:56	00:31:47	Lob	S_attempt	K	1
2016-08-08	7	1	16:58:09	02:17:09	00:32:00	Lob	exit	T	1
2016-08-08	7	1	16:59:19	02:18:19	00:33:10	Lob	F_attempt	E	165
2016-08-08	7	1	17:09:33	02:28:33	00:08:01	Lob	F_attempt	E	100
2016-08-08	7	1	17:11:39	02:30:39	00:10:07	Lob	F_attempt	E	15
2016-08-08	7	1	17:12:40	02:31:40	00:11:08	Lob	F_attempt	E	49
2016-08-08	7	1	17:15:18	02:34:18	00:13:46	Lob	exit	B	5
2016-08-08	7	1	17:16:32	02:35:32	00:15:00	Lob	S_attempt	B	6
2016-08-08	7	1	17:21:17	02:40:17	00:19:45	Lob	exit	T	1
2016-08-08	7	1	17:21:38	02:40:38	00:20:06	Lob	F_attempt	E	39
2016-08-08	7	1	17:23:00	02:42:00	00:21:28	Lob	F_attempt	E	229
2016-08-08	7	1	17:23:53	02:42:53	00:22:21	Lob	S_attempt	B	2
2016-08-08	7	1	17:25:12	02:44:12	00:23:40	Lob	exit	T	5
2016-08-08	7	1	17:25:46	02:44:46	00:24:14	Lob	S_attempt	T	5
2016-08-08	7	1	17:27:07	02:46:07	00:25:35	Lob	F_attempt	E	124
2016-08-08	7	1	17:27:11	02:46:11	00:25:39	Lob	exit	B	4
2016-08-08	7	1	17:29:50	02:48:50	00:28:18	Lob	S_attempt	E	41
2016-08-08	7	1	17:30:35	02:49:35	00:29:03	Lob	exit	B	1
2016-08-08	7	1	17:31:13	02:50:13	00:29:41	Lob	S_attempt	B	3
2016-08-08	7	1	17:32:40	02:51:40	00:31:08	Lob	exit	B	3
2016-08-08	7	1	17:32:43	02:51:43	00:31:11	Lob	F_attempt	E	17
2016-08-08	7	1	17:33:36	02:52:36	00:32:04	Lob	F_attempt	E	226
2016-08-08	7	1	17:35:21	02:54:21	00:33:49	Lob	S_attempt	B	3
2016-08-08	7	1	17:35:48	02:54:48	00:34:16	Lob	feeding		6
2016-08-08	7	1	17:37:31	02:56:31	00:00:36	Lob	S_attempt	E	17
2016-08-08	7	1	17:37:51	02:56:51	00:00:56	Lob	feeding		34
2016-08-08	7	1	17:38:47	02:57:47	00:01:52	Lob	feeding		32
2016-08-08	7	1	17:39:39	02:58:39	00:02:44	Lob	exit	B	2
2016-08-08	7	1	17:40:11	02:59:11	00:03:16	Lob	feeding		271
2016-08-08	7	1	17:44:23	03:03:23	00:07:28	Lob	S_attempt	B	7
2016-08-08	7	1	17:46:08	03:05:08	00:09:13	Lob	feeding		82
2016-08-08	7	1	17:47:05	03:06:05	00:10:10	Lob	exit	T	1
2016-08-08	7	1	17:47:24	03:06:24	00:10:29	Lob	S_attempt	T	3
2016-08-08	7	1	17:47:39	03:06:39	00:10:44	Lob	feeding		13
2016-08-08	7	1	17:47:42	03:06:42	00:10:47	Lob	S_attempt	E	19
2016-08-08	7	1	17:48:02	03:07:02	00:11:07	Lob	exit	E	1
2016-08-08	7	1	17:48:18	03:07:18	00:11:23	Lob	F_attempt	E	33
2016-08-08	7	1	17:49:20	03:08:20	00:12:25	Lob	feeding		223
2016-08-08	7	1	17:51:34	03:10:34	00:14:39	Lob	S_attempt	T	5
2016-08-08	7	1	17:53:33	03:12:33	00:16:38	Lob	F_attempt	E	60
2016-08-08	7	1	17:53:36	03:12:36	00:16:41	Lob	feeding		4
2016-08-08	7	1	17:55:19	03:14:19	00:18:24	Lob	S_attempt	E	28
2016-08-08	7	1	17:55:51	03:14:51	00:18:56	Lob	S_attempt	E	101
2016-08-08	7	1	17:56:27	03:15:27	00:19:32	Lob	S_attempt	B	4
2016-08-08	7	1	17:56:28	03:15:28	00:19:33	Lob	exit	B	1
2016-08-08	7	1	17:56:40	03:15:40	00:19:45	Lob	exit	B	2
2016-08-08	7	1	17:57:26	03:16:26	00:20:31	Lob	F_attempt	B	11
2016-08-08	7	1	17:57:37	03:16:37	00:20:42	Lob	feeding		111
2016-08-08	7	1	17:58:36	03:17:36	00:21:41	Lob	exit	T	2
2016-08-08	7	1	17:58:47	03:17:47	00:21:52	Lob	S_attempt	B	13
2016-08-08	7	1	17:59:23	03:18:23	00:22:28	Lob	exit	B	2
2016-08-08	7	1	17:59:26	03:18:26	00:22:31	Lob	S_attempt	B	6
2016-08-08	7	1	17:59:54	03:18:54	00:22:59	Lob	feeding		82
2016-08-08	7	1	18:00:05	03:19:05	00:23:10	Lob	exit	B	2
2016-08-08	7	1	18:01:31	03:20:31	00:24:36	Lob	exit	P	1
2016-08-08	7	1	18:02:15	03:21:15	00:25:20	Lob	feeding		180
2016-08-08	7	1	18:04:44	03:23:44	00:27:49	Lob	S_attempt	T	3
2016-08-08	7	1	18:05:01	03:24:01	00:28:06	Lob	S_attempt	T	2
2016-08-08	7	1	18:05:38	03:24:38	00:28:43	Lob	exit	B	2
2016-08-08	7	1	18:06:01	03:25:01	00:29:06	Lob	S_attempt	B	7
2016-08-08	7	1	18:06:09	03:25:09	00:29:14	Lob	exit	K	1
2016-08-08	7	1	18:06:23	03:25:23	00:29:28	Lob	exit	B	3
2016-08-08	7	1	18:07:08	03:26:08	00:30:13	Lob	S_attempt	E	12
2016-08-08	7	1	18:08:04	03:27:04	00:31:09	Lob	feeding		260
2016-08-08	7	1	18:08:20	03:27:20	00:31:25	Lob	S_attempt	B	8
2016-08-08	7	1	18:08:56	03:27:56	00:32:01	Lob	exit	B	2
2016-08-08	7	1	18:10:30	03:29:30	00:33:35	Lob	S_attempt	T	7
2016-08-08	7	1	18:10:47	03:29:47	00:33:52	Lob	S_attempt	B	5
2016-08-08	7	1	18:11:09	03:30:09	00:34:14	Lob	exit	B	2
2016-08-08	7	1	18:11:49	03:30:49	00:34:54	Lob	exit	T	3
2016-08-08	7	1	18:12:37	03:31:37	00:00:19	Lob	feeding		53
2016-08-08	7	1	18:12:46	03:31:46	00:00:28	Lob	S_attempt	B	1
2016-08-08	7	1	18:13:09	03:32:09	00:00:51	Lob	exit	T	2
2016-08-08	7	1	18:14:46	03:33:46	00:02:28	Lob	feeding		181
2016-08-08	7	1	18:17:50	03:36:50	00:05:32	Lob	S_attempt	T	10
2016-08-08	7	1	18:18:12	03:37:12	00:05:54	Lob	exit	T	2
2016-08-08	7	1	18:19:01	03:38:01	00:06:43	Lob	S_attempt	T	10
2016-08-08	7	1	18:20:22	03:39:22	00:08:04	Lob	exit	T	1
2016-08-08	7	1	18:21:13	03:40:13	00:08:55	Lob	feeding		30
2016-08-08	7	1	18:21:44	03:40:44	00:09:26	Lob	S_attempt	T	5
2016-08-08	7	1	18:21:59	03:40:59	00:09:41	Lob	F_attempt	E	15
2016-08-08	7	1	18:22:04	03:41:04	00:09:46	Lob	exit	T	4
2016-08-08	7	1	18:22:25	03:41:25	00:10:07	Lob	F_attempt	E	199
2016-08-08	7	1	18:26:25	03:45:25	00:14:07	Lob	S_attempt	E	105
2016-08-08	7	1	18:35:04	03:54:04	00:22:46	Lob	F_attempt	E	317
2016-08-08	7	1	18:39:06	03:58:06	00:26:48	Lob	exit	B	3
2016-08-08	7	1	18:40:09	03:59:09	00:27:51	Lob	F_attempt	T	11
2016-08-08	7	1	18:41:41	04:00:41	00:29:23	Lob	F_attempt	T	7
2016-08-08	7	1	18:48:46	04:07:46	00:01:05	Lob	F_attempt	B	22
2016-08-08	7	1	18:52:27	04:11:27	00:04:46	Lob	F_attempt	E	7
2016-08-08	7	1	18:53:08	04:12:08	00:05:27	Lob	F_attempt	E	742
2016-08-08	7	1	18:53:47	04:12:47	00:06:06	Lob	S_attempt	T	2
2016-08-08	7	1	18:53:56	04:12:56	00:06:15	GC-Lob	aggression		84
2016-08-08	7	1	18:54:15	04:13:15	00:06:34	Lob	exit	T	4
2016-08-08	7	1	18:55:40	04:14:40	00:07:59	GC-Lob	aggression		10
2016-08-08	7	1	19:00:21	04:19:21	00:12:40	Lob	S_attempt	B	5
2016-08-08	7	1	19:02:53	04:21:53	00:15:12	Lob	exit	B	2
2016-08-08	7	1	19:04:22	04:23:22	00:16:41	Lob	exit	B	4
2016-08-08	7	1	19:06:56	04:25:56	00:19:15	Lob	F_attempt	E	235
2016-08-08	7	1	19:10:07	04:29:07	00:22:26	Lob	S_attempt	B	4
2016-08-08	7	1	19:11:16	04:30:16	00:23:35	Lob	S_attempt	E	121
2016-08-08	7	1	19:11:46	04:30:46	00:24:05	Lob	exit	P	1
2016-08-08	7	1	19:13:26	04:32:26	00:25:45	Lob	feeding		42
2016-08-08	7	1	19:14:35	04:33:35	00:26:54	Lob	feeding		19
2016-08-08	7	1	19:16:38	04:35:38	00:28:57	Lob	feeding		60
2016-08-08	7	1	19:19:42	04:38:42	00:32:01	Lob	exit	B	2
2016-08-08	7	1	19:20:35	04:39:35	00:32:54	Lob	F_attempt	E	82
2016-08-08	7	1	19:22:42	04:41:42	00:35:01	Lob	feeding		28
2016-08-08	7	1	19:24:00	04:43:00	00:00:56	Lob	F_attempt	E	83
2016-08-08	7	1	19:25:10	04:44:10	00:02:06	Lob	S_attempt	T	3
2016-08-08	7	1	19:25:27	04:44:27	00:02:23	Lob	F_attempt	E	16
2016-08-08	7	1	19:26:00	04:45:00	00:02:56	Lob	exit	B	7
2016-08-08	7	1	19:26:10	04:45:10	00:03:06	Lob	F_attempt	E	241
2016-08-08	7	1	19:27:43	04:46:43	00:04:39	GC-Lob	aggression		17
2016-08-08	7	1	19:30:09	04:49:09	00:07:05	Lob	F_attempt	E	1
2016-08-08	7	1	19:31:01	04:50:01	00:07:57	Lob	F_attempt	E	68
2016-08-08	7	1	19:32:39	04:51:39	00:09:35	Lob	F_attempt	E	28
2016-08-08	7	1	19:34:31	04:53:31	00:11:27	Lob	F_attempt	E	80
2016-08-08	7	1	19:35:44	04:54:44	00:12:40	Lob	exit	B	2
2016-08-08	7	1	19:38:26	04:57:26	00:15:22	Lob	S_attempt	T	3
2016-08-08	7	1	19:38:50	04:57:50	00:15:46	Lob	feeding		36
2016-08-08	7	1	19:39:16	04:58:16	00:16:12	Lob	F_attempt	T	17
2016-08-08	7	1	19:40:06	04:59:06	00:17:02	Lob	F_attempt	E	6
2016-08-08	7	1	19:40:21	04:59:21	00:17:17	Lob	F_attempt	E	106
2016-08-08	7	1	19:41:28	05:00:28	00:18:24	Lob	S_attempt	T	10
2016-08-08	7	1	19:42:03	05:01:03	00:18:59	Lob	exit	K	1
2016-08-08	7	1	19:43:39	05:02:39	00:20:35	Lob	F_attempt	E	42
2016-08-08	7	1	19:44:25	05:03:25	00:21:21	Lob	F_attempt	E	84
2016-08-08	7	1	19:45:25	05:04:25	00:22:21	Lob	S_attempt	T	8
2016-08-08	7	1	19:46:05	05:05:05	00:23:01	Lob	F_attempt	E	83
2016-08-08	7	1	19:47:32	05:06:32	00:24:28	Lob	F_attempt	E	243
2016-08-08	7	1	19:47:54	05:06:54	00:24:50	Lob	exit	T	6
2016-08-08	7	1	19:53:14	05:12:14	00:30:10	Lob	F_attempt	E	66
2016-08-08	7	1	19:55:39	05:14:39	00:32:35	Lob	S_attempt	E	38
2016-08-08	7	1	19:56:29	05:15:29	00:33:25	Lob	feeding		10
2016-08-08	7	1	19:56:30	05:15:30	00:33:26	Lob	F_attempt	E	216
2016-08-08	7	1	19:56:55	05:15:55	00:33:51	Lob	feeding		51
2016-08-08	7	1	19:58:15	05:17:15	00:35:11	Lob	feeding		77
2016-08-08	7	1	19:59:52	05:18:52	00:01:25	Lob	S_attempt	B	4
2016-08-08	7	1	19:59:54	05:18:54	00:01:27	Lob	feeding		151
2016-08-08	7	1	20:01:52	05:20:52	00:03:25	Lob	F_attempt	E	182
2016-08-08	7	1	20:03:47	05:22:47	00:05:20	Lob	exit	B	3
2016-08-08	7	1	20:03:58	05:22:58	00:05:31	Lob	feeding		47
2016-08-08	7	1	20:05:06	05:24:06	00:06:39	Lob	feeding		51
2016-08-08	7	1	20:05:19	05:24:19	00:06:52	Lob	F_attempt	E	45
2016-08-08	7	1	20:06:21	05:25:21	00:07:54	Lob	F_attempt	E	35
2016-08-08	7	1	20:06:52	05:25:52	00:08:25	Lob	feeding		41
2016-08-08	7	1	20:07:13	05:26:13	00:08:46	Lob	F_attempt	E	37
2016-08-08	7	1	20:08:20	05:27:20	00:09:53	Lob	S_attempt	B	9
2016-08-08	7	1	20:08:35	05:27:35	00:10:08	Lob	exit	B	1
2016-08-08	7	1	20:09:42	05:28:42	00:11:15	Lob	feeding		85
2016-08-08	7	1	20:10:54	05:29:54	00:12:27	Lob	F_attempt	E	50
2016-08-08	7	1	20:14:42	05:33:42	00:16:15	Lob	feeding		36
2016-08-08	7	1	20:15:07	05:34:07	00:16:40	Lob	F_attempt	E	51
2016-08-08	7	1	20:16:05	05:35:05	00:17:38	Lob	feeding		23
2016-08-08	7	1	20:17:20	05:36:20	00:18:53	Lob	feeding		130
2016-08-08	7	1	20:21:40	05:40:40	00:23:13	Lob	feeding		12
2016-08-08	7	1	20:21:51	05:40:51	00:23:24	Lob	F_attempt	E	96
2016-08-08	7	1	20:26:00	05:45:00	00:27:33	Lob	F_attempt	E	44
2016-08-08	7	1	20:28:58	05:47:58	00:30:31	Lob	S_attempt	B	3
2016-08-08	7	1	20:29:32	05:48:32	00:31:05	Lob	S_attempt	E	9
2016-08-08	7	1	20:29:50	05:48:50	00:31:23	Lob	exit	K	3
2016-08-08	7	1	20:30:37	05:49:37	00:32:10	Lob	feeding		220
2016-08-08	7	1	20:30:52	05:49:52	00:32:25	Lob	exit	B	3
2016-08-08	7	1	20:30:51	05:49:51	00:32:24	Lob	S_attempt	T	9
2016-08-08	7	1	20:32:50	05:51:50	00:34:23	Lob	exit	T	1
2016-08-08	7	1	20:34:08	05:53:08	00:00:18	Lob	F_attempt	E	23
2016-08-08	7	1	20:34:31	05:53:31	00:00:41	Lob	feeding		21
2016-08-08	7	1	20:34:59	05:53:59	00:01:09	Lob	feeding		46
2016-08-08	7	1	20:38:35	05:57:35	00:04:45	Lob	F_attempt	E	59
2016-08-08	7	1	20:39:48	05:58:48	00:05:58	Lob	F_attempt	E	147
2016-08-08	7	1	20:40:41	05:59:41	00:06:51	Lob	S_attempt	B	3
2016-08-08	7	1	20:41:07	06:00:07	00:07:17	Lob	exit	B	1
2016-08-08	7	1	20:42:20	06:01:20	00:08:30	Lob	F_attempt	E	9
2016-08-08	7	1	20:42:39	06:01:39	00:08:49	Lob	F_attempt	E	16
2016-08-08	7	1	20:42:57	06:01:57	00:09:07	Lob	F_attempt	E	6
2016-08-08	7	1	20:43:15	06:02:15	00:09:25		end			0
2016-08-09	8	1	09:24:00	00:00:00	00:01:00		start
2016-08-09	8	1	09:35:10	00:11:10	00:12:10	GC	feeding		221
2016-08-09	8	1	09:35:38	00:11:38	00:12:38	GC	feeding		13
2016-08-09	8	1	09:38:35	00:14:35	00:15:35	GC	feeding		446
2016-08-09	8	1	09:39:08	00:15:08	00:16:08	Lob	F_attempt	E	10
2016-08-09	8	1	09:39:23	00:15:23	00:16:23	Lob	F_attempt	E	24
2016-08-09	8	1	09:41:22	00:17:22	00:18:22	GC	feeding		229
2016-08-09	8	1	09:43:25	00:19:25	00:20:25	Lob	F_attempt	E	50
2016-08-09	8	1	09:44:23	00:20:23	00:21:23	Lob	F_attempt	E	19
2016-08-09	8	1	09:44:41	00:20:41	00:21:41	GC	feeding		11
2016-08-09	8	1	09:47:09	00:23:09	00:24:09	GC	feeding		143
2016-08-09	8	1	09:54:41	00:30:41	00:31:41	Lob	S_attempt	E	39
2016-08-09	8	1	09:55:40	00:31:40	00:32:40	GC	feeding		329
2016-08-09	8	1	09:58:52	00:34:52	00:00:29	Lob	exit	T	3
2016-08-09	8	1	10:01:09	00:37:09	00:02:46	Lob	S_attempt	B	13
2016-08-09	8	1	10:01:24	00:37:24	00:03:01	Lob	exit	B	1
2016-08-09	8	1	10:03:55	00:39:55	00:05:32	Lob	S_attempt	E	14
2016-08-09	8	1	10:04:21	00:40:21	00:05:58	Lob	S_attempt	T	8
2016-08-09	8	1	10:04:22	00:40:22	00:05:59	Lob	feeding		23
2016-08-09	8	1	10:05:02	00:41:02	00:06:39	Lob	exit	B	1
2016-08-09	8	1	10:05:25	00:41:25	00:07:02	Lob	S_attempt	B	12
2016-08-09	8	1	10:05:40	00:41:40	00:07:17	Lob	exit	B	1
2016-08-09	8	1	10:06:03	00:42:03	00:07:40	Lob	feeding		11
2016-08-09	8	1	10:06:27	00:42:27	00:08:04	Lob	feeding		10
2016-08-09	8	1	10:06:55	00:42:55	00:08:32	Lob	feeding		1089
2016-08-09	8	1	10:07:42	00:43:42	00:09:19	Lob	S_attempt	B	3
2016-08-09	8	1	10:07:54	00:43:54	00:09:31	Lob	exit	B	1
2016-08-09	8	1	10:12:18	00:48:18	00:13:55	Lob	S_attempt	T	3
2016-08-09	8	1	10:12:55	00:48:55	00:14:32	Lob	exit	T	2
2016-08-09	8	1	10:24:20	01:00:20	00:25:57	Lob	F_attempt	E	71
2016-08-09	8	1	10:24:49	01:00:49	00:26:26	GC-Lob	aggression		5
2016-08-09	8	1	10:25:15	01:01:15	00:26:52	Lob	feeding		987
2016-08-09	8	1	10:33:50	01:09:50	00:00:04	Lob	S_attempt	B	6
2016-08-09	8	1	10:34:04	01:10:04	00:00:18	Lob	exit	B	1
2016-08-09	8	1	10:34:38	01:10:38	00:00:52	Lob	F_attempt	E	3
2016-08-09	8	1	10:35:14	01:11:14	00:01:28	Lob	F_attempt	E	18
2016-08-09	8	1	10:37:11	01:13:11	00:03:25	Lob	S_attempt	B	2
2016-08-09	8	1	10:37:39	01:13:39	00:03:53	Lob	exit	B	1
2016-08-09	8	1	10:41:36	01:17:36	00:07:50	Lob	F_attempt	E	27
2016-08-09	8	1	10:41:46	01:17:46	00:08:00	Lob	feeding		46
2016-08-09	8	1	10:42:45	01:18:45	00:08:59	Lob	feeding		522
2016-08-09	8	1	10:51:26	01:27:26	00:17:40	Lob	F_attempt	E	2
2016-08-09	8	1	10:51:49	01:27:49	00:18:03	Lob	feeding		124
2016-08-09	8	1	10:54:12	01:30:12	00:20:26	Lob	feeding		46
2016-08-09	8	1	10:54:31	01:30:31	00:20:45	Lob	F_attempt	E	49
2016-08-09	8	1	10:55:24	01:31:24	00:21:38	Lob	feeding		119
2016-08-09	8	1	10:57:40	01:33:40	00:23:54	Lob	feeding		85
2016-08-09	8	1	10:58:35	01:34:35	00:24:49	Lob	F_attempt	E	41
2016-08-09	8	1	11:00:09	01:36:09	00:26:23	Lob	F_attempt	E	6
2016-08-09	8	1	11:00:27	01:36:27	00:26:41	Lob	feeding		107
2016-08-09	8	1	11:02:16	01:38:16	00:28:30	Lob	S_attempt	E	39
2016-08-09	8	1	11:03:09	01:39:09	00:29:23	Lob	feeding		48
2016-08-09	8	1	11:04:06	01:40:06	00:30:20	Lob	feeding		125
2016-08-09	8	1	11:07:10	01:43:10	00:33:24	Lob	feeding		44
2016-08-09	8	1	11:09:06	01:45:06	00:35:20	Lob	feeding		74
2016-08-09	8	1	11:09:10	01:45:10	00:00:01	Lob	feeding		72
2016-08-09	8	1	11:10:50	01:46:50	00:01:41	Lob	feeding		76
2016-08-09	8	1	11:31:32	02:07:32	00:22:23	Lob	S_attempt	T	7
2016-08-09	8	1	11:31:56	02:07:56	00:22:47	Lob	exit	T	3
2016-08-09	8	1	11:37:45	02:13:45	00:28:36	DIVE	DIVE
2016-08-09	8	1	11:56:17	02:32:17	00:11:45	DIVE	DIVE
2016-08-09	8	1	12:26:32	03:02:32	00:06:37	Lob	S_attempt	E	67
2016-08-09	8	1	12:27:49	03:03:49	00:07:54	Lob	feeding		569
2016-08-09	8	1	12:34:30	03:10:30	00:14:35	Lob	S_attempt	K	2
2016-08-09	8	1	12:34:55	03:10:55	00:15:00	Lob	exit	T	1
2016-08-09	8	1	13:51:10	04:27:10	00:20:29	Lob	S_attempt	B	2
2016-08-09	8	1	13:51:44	04:27:44	00:21:03	Lob	exit	T	2
2016-08-09	8	1	13:58:59	04:34:59	00:28:18	Lob	F_attempt	E	95
2016-08-09	8	1	14:00:38	04:36:38	00:29:57	Lob	feeding		30
2016-08-09	8	1	14:01:41	04:37:41	00:31:00	Lob	feeding		16
2016-08-09	8	1	14:08:29	04:44:29	00:02:25	Lob	S_attempt	B	7
2016-08-09	8	1	14:09:15	04:45:15	00:03:11	Lob	exit	T	2
2016-08-09	8	1	14:18:26	04:54:26	00:12:22	Lob	F_attempt	E	18
2016-08-09	8	1	14:31:54	05:07:54	00:25:50	GC	feeding		1639
2016-08-09	8	1	14:40:36	05:16:36	00:34:32	Lob	F_attempt	E	3
2016-08-09	8	1	15:16:43	05:52:43	00:35:16	Lob	S_attempt	B	4
2016-08-09	8	1	15:17:08	05:53:08	00:00:18	Lob	exit	B	2
2016-08-09	8	1	15:45:11	06:21:11	00:28:21	Lob	F_attempt	E	23
2016-08-09	8	1	17:49:21	08:25:21	00:10:59	Lob	S_attempt	E	9
2016-08-09	8	1	17:49:40	08:25:40	00:11:18	Lob	feeding		61
2016-08-09	8	1	17:51:13	08:27:13	00:12:51	Lob	feeding		479
2016-08-09	8	1	18:00:24	08:36:24	00:22:02	Lob	feeding		158
2016-08-09	8	1	18:03:44	08:39:44	00:25:22	Lob	feeding		182
2016-08-09	8	1	18:07:31	08:43:31	00:29:09	Lob	feeding		157
2016-08-09	8	1	18:10:21	08:46:21	00:31:59	Lob	feeding		94
2016-08-09	8	1	18:12:15	08:48:15	00:33:53	Lob	feeding		191
2016-08-09	8	1	18:15:46	08:51:46	00:02:01	Lob	feeding		203
2016-08-09	8	1	18:19:34	08:55:34	00:05:49	Lob	feeding		313
2016-08-09	8	1	18:25:20	09:01:20	00:11:35	Lob	feeding		18
2016-08-09	8	1	18:26:21	09:02:21	00:12:36	Lob	feeding		98
2016-08-09	8	1	18:27:35	09:03:35	00:13:50	Lob	F_attempt	E	37
2016-08-09	8	1	18:28:02	09:04:02	00:14:17	GC-Lob	aggression		9
2016-08-09	8	1	19:25:46	10:01:46	00:01:15	GC-Lob	aggression		17
2016-08-09	8	1	20:49:17	11:25:17	00:14:00		end			4
2016-08-10	9	1	09:45:00	00:00:00	00:00:50		start
2016-08-10	9	1	09:52:10	00:07:10	00:08:00	Lob	S_attempt	E	16
2016-08-10	9	1	09:52:37	00:07:37	00:08:27	Lob	feeding		12
2016-08-10	9	1	09:55:56	00:10:56	00:11:46	Lob	feeding		174
2016-08-10	9	1	09:58:18	00:13:18	00:14:08	Lob	F_attempt	T	17
2016-08-10	9	1	09:59:21	00:14:21	00:15:11	Lob	S_attempt	T	3
2016-08-10	9	1	09:59:49	00:14:49	00:15:39	Lob	exit	T	1
2016-08-10	9	1	10:15:44	00:30:44	00:31:34	Lob	F_attempt	E	29
2016-08-10	9	1	10:21:50	00:36:50	00:02:17	Lob	S_attempt	E	37
2016-08-10	9	1	10:25:06	00:40:06	00:05:33	Lob	aggression		48
2016-08-10	9	1	10:26:54	00:41:54	00:07:21	Lob	aggression		131
2016-08-10	9	1	10:38:02	00:53:02	00:18:29	Lob	S_attempt	E	305
2016-08-10	9	1	10:39:07	00:54:07	00:19:34	Lob	aggression		56
2016-08-10	9	1	10:43:47	00:58:47	00:24:14	Lob	feeding		131
2016-08-10	9	1	10:45:21	01:00:21	00:25:48	Lob	F_attempt	E	38
2016-08-10	9	1	10:46:16	01:01:16	00:26:43	Lob	feeding		459
2016-08-10	9	1	10:47:38	01:02:38	00:28:05	Lob	aggression		61
2016-08-10	9	1	10:53:58	01:08:58	00:34:25	Lob	F_attempt	B	4
2016-08-10	9	1	10:54:53	01:09:53	00:35:20	Lob	feeding		317
2016-08-10	9	1	10:56:31	01:11:31	00:01:35	Lob	S_attempt	B	8
2016-08-10	9	1	10:56:46	01:11:46	00:01:50	Lob	exit	B	1
2016-08-10	9	1	10:58:01	01:13:01	00:03:05	Lob	S_attempt	B	6
2016-08-10	9	1	10:59:15	01:14:15	00:04:19	Lob	F_attempt	B	16
2016-08-10	9	1	10:59:38	01:14:38	00:04:42	Lob	exit	B	1
2016-08-10	9	1	10:59:49	01:14:49	00:04:53	Lob	S_attempt	B	5
2016-08-10	9	1	11:00:10	01:15:10	00:05:14	Lob	exit	K	1
2016-08-10	9	1	11:00:54	01:15:54	00:05:58	Lob	feeding		253
2016-08-10	9	1	11:04:24	01:19:24	00:09:28	Lob	F_attempt	E	85
2016-08-10	9	1	11:05:27	01:20:27	00:10:31	Lob	feeding		24
2016-08-10	9	1	11:06:08	01:21:08	00:11:12	Lob	feeding		261
2016-08-10	9	1	11:10:33	01:25:33	00:15:37	Lob	aggression		6
2016-08-10	9	1	11:10:47	01:25:47	00:15:51	Lob	feeding		17
2016-08-10	9	1	11:10:54	01:25:54	00:15:58	Lob	aggression		52
2016-08-10	9	1	11:10:55	01:25:55	00:15:59	DIVE	DIVE
2016-08-10	9	1	11:11:14	01:26:14	00:16:18	Lob	feeding		140
2016-08-10	9	1	11:17:19	01:32:19	00:22:23	Lob	feeding		228
2016-08-10	9	1	11:21:31	01:36:31	00:26:35	Lob	feeding		34
2016-08-10	9	1	11:24:27	01:39:27	00:29:31	Lob	S_attempt	B	11
2016-08-10	9	1	11:24:35	01:39:35	00:29:39	Lob	aggression		81
2016-08-10	9	1	11:24:52	01:39:52	00:29:56	Lob	exit	B	1
2016-08-10	9	1	11:28:44	01:43:44	00:33:48	Lob	S_attempt	E	124
2016-08-10	9	1	11:30:02	01:45:02	00:35:06	GC-Lob	aggression		19
2016-08-10	9	1	11:31:02	01:46:02	00:00:43	Lob	feeding		406
2016-08-10	9	1	11:31:47	01:46:47	00:01:28	DIVE	DIVE
2016-08-10	9	1	11:38:18	01:53:18	00:07:59	Lob	feeding		179
2016-08-10	9	1	11:41:27	01:56:27	00:11:08	Lob	feeding		103
2016-08-10	9	1	11:43:38	01:58:38	00:13:19	Lob	feeding		140
2016-08-10	9	1	11:46:08	02:01:08	00:15:49	Lob	feeding		95
2016-08-10	9	1	11:49:11	02:04:11	00:18:52	Lob	feeding		14
2016-08-10	9	1	11:50:35	02:05:35	00:20:16	Lob	feeding		12
2016-08-10	9	1	11:52:40	02:07:40	00:22:21	Lob	feeding		93
2016-08-10	9	1	11:54:38	02:09:38	00:24:19	Lob	F_attempt	E	24
2016-08-10	9	1	12:01:35	02:16:35	00:31:16	Lob	F_attempt	E	1
2016-08-10	9	1	12:12:41	02:27:41	00:06:59	Lob	feeding		33
2016-08-10	9	1	12:44:17	02:59:17	00:03:12	Lob	F_attempt	E	67
2016-08-10	9	1	13:00:20	03:15:20	00:19:15	Lob	F_attempt	E	3
2016-08-10	9	1	13:07:21	03:22:21	00:26:16	GC	feeding		782
2016-08-10	9	1	13:12:15	03:27:15	00:31:10	Lob	F_attempt	T	2
2016-08-10	9	1	13:17:20	03:32:20	00:00:52	Lob	S_attempt	T	4
2016-08-10	9	1	13:17:49	03:32:49	00:01:21	Lob	exit	T	1
2016-08-10	9	1	13:20:25	03:35:25	00:03:57	Lob	F_attempt	E	21
2016-08-10	9	1	13:21:12	03:36:12	00:04:44	Lob	F_attempt	E	423
2016-08-10	9	1	13:23:15	03:38:15	00:06:47	Lob	S_attempt	T	10
2016-08-10	9	1	13:24:05	03:39:05	00:07:37	Lob	exit	K	1
2016-08-10	9	1	13:26:16	03:41:16	00:09:48	Lob	F_attempt	B	5
2016-08-10	9	1	13:28:21	03:43:21	00:11:53	Lob	feeding		112
2016-08-10	9	1	13:31:38	03:46:38	00:15:10	Lob	feeding		47
2016-08-10	9	1	13:32:57	03:47:57	00:16:29	Lob	feeding		114
2016-08-10	9	1	13:35:02	03:50:02	00:18:34	Lob	F_attempt	E	149
2016-08-10	9	1	13:35:26	03:50:26	00:18:58	GC-Lob	aggression		7
2016-08-10	9	1	13:35:39	03:50:39	00:19:11	Lob	feeding		31
2016-08-10	9	1	13:38:23	03:53:23	00:21:55	Lob	feeding		63
2016-08-10	9	1	13:39:22	03:54:22	00:22:54	Lob	S_attempt	E	68
2016-08-10	9	1	13:41:13	03:56:13	00:24:45	Lob	exit	E	1
2016-08-10	9	1	13:41:44	03:56:44	00:25:16	Lob	feeding		222
2016-08-10	9	1	13:46:07	04:01:07	00:29:39	Lob	feeding		44
2016-08-10	9	1	13:46:59	04:01:59	00:30:31	Lob	feeding		83
2016-08-10	9	1	13:48:00	04:03:00	00:31:32	Lob	feeding		23
2016-08-10	9	1	13:48:26	04:03:26	00:31:58	Lob	feeding		24
2016-08-10	9	1	13:51:03	04:06:03	00:34:35	Lob	feeding		56
2016-08-10	9	1	13:54:38	04:09:38	00:02:47	Lob	S_attempt	B	5
2016-08-10	9	1	13:55:05	04:10:05	00:03:14	Lob	exit	B	13
2016-08-10	9	1	13:55:21	04:10:21	00:03:30	Lob	S_attempt	B	15
2016-08-10	9	1	13:56:27	04:11:27	00:04:36	Lob	exit	T	1
2016-08-10	9	1	13:58:18	04:13:18	00:06:27	Lob	S_attempt	T	3
2016-08-10	9	1	13:58:54	04:13:54	00:07:03	Lob	exit	B	2
2016-08-10	9	1	14:10:11	04:25:11	00:18:20	Lob	F_attempt	E	5
2016-08-10	9	1	14:41:29	04:56:29	00:14:15	Lob	F_attempt	E	88
2016-08-10	9	1	14:43:00	04:58:00	00:15:46	Lob	F_attempt	E	92
2016-08-10	9	1	15:01:37	05:16:37	00:34:23	Lob	F_attempt	E	80
2016-08-10	9	1	15:03:58	05:18:58	00:01:21	Lob	F_attempt	E	142
2016-08-10	9	1	15:10:52	05:25:52	00:08:15	Lob	F_attempt	E	64
2016-08-10	9	1	15:12:20	05:27:20	00:09:43	Lob	S_attempt	B	30
2016-08-10	9	1	15:14:06	05:29:06	00:11:29	Lob	exit	T	1
2016-08-10	9	1	15:17:38	05:32:38	00:15:01	Lob	S_attempt	B	38
2016-08-10	9	1	15:18:23	05:33:23	00:15:46	Lob	exit	B	2
2016-08-10	9	1	15:18:46	05:33:46	00:16:09	Lob	F_attempt	E	93
2016-08-10	9	1	15:21:06	05:36:06	00:18:29	Lob	S_attempt	E	145
2016-08-10	9	1	15:23:40	05:38:40	00:21:03	GC-Lob	aggression		37
2016-08-10	9	1	15:24:25	05:39:25	00:21:48	Lob	feeding		140
2016-08-10	9	1	15:27:40	05:42:40	00:25:03	Lob	feeding		58
2016-08-10	9	1	15:31:26	05:46:26	00:28:49	Lob	feeding		266
2016-08-10	9	1	15:37:09	05:52:09	00:34:32	Lob	F_attempt	E	10
2016-08-10	9	1	15:44:34	05:59:34	00:06:34	Lob	S_attempt	B	6
2016-08-10	9	1	15:44:55	05:59:55	00:06:55	Lob	exit	K	1
2016-08-10	9	1	15:47:18	06:02:18	00:09:18	Lob	S_attempt	B	12
2016-08-10	9	1	15:48:08	06:03:08	00:10:08	Lob	exit	B	1
2016-08-10	9	1	15:48:25	06:03:25	00:10:25	Lob	feeding		112
2016-08-10	9	1	15:48:53	06:03:53	00:10:53	Lob	S_attempt	B	15
2016-08-10	9	1	15:49:15	06:04:15	00:11:15	Lob	exit	B	5
2016-08-10	9	1	16:02:37	06:17:37	00:24:37	GC	feeding		23
2016-08-10	9	1	16:08:57	06:23:57	00:30:57	Lob	feeding		52
2016-08-10	9	1	16:12:09	06:27:09	00:34:09	Lob	S_attempt	B	19
2016-08-10	9	1	16:13:14	06:28:14	00:35:14	Lob	F_attempt	B	11
2016-08-10	9	1	16:13:15	06:28:15	00:35:15	Lob	exit	K	1
2016-08-10	9	1	16:15:29	06:30:29	00:02:06	Lob	S_attempt	B	6
2016-08-10	9	1	16:15:42	06:30:42	00:02:19	Lob	exit	B	1
2016-08-10	9	1	16:17:16	06:32:16	00:03:53	Lob	S_attempt	B	6
2016-08-10	9	1	16:17:26	06:32:26	00:04:03	Lob	exit	B	2
2016-08-10	9	1	16:19:50	06:34:50	00:06:27	Lob	S_attempt	B	12
2016-08-10	9	1	16:20:27	06:35:27	00:07:04	Lob	S_attempt	E	48
2016-08-10	9	1	16:21:09	06:36:09	00:07:46	Lob	exit	B	6
2016-08-10	9	1	16:21:31	06:36:31	00:08:08	Lob	feeding		138
2016-08-10	9	1	16:25:06	06:40:06	00:11:43	Lob	feeding		65
2016-08-10	9	1	16:29:21	06:44:21	00:15:58	Lob	S_attempt	B	3
2016-08-10	9	1	16:29:38	06:44:38	00:16:15	Lob	exit	B	1
2016-08-10	9	1	16:32:50	06:47:50	00:19:27	Lob	F_attempt	E	18
2016-08-10	9	1	16:35:03	06:50:03	00:21:40	Lob	F_attempt	B	6
2016-08-10	9	1	16:35:25	06:50:25	00:22:02	Lob	F_attempt	E	11
2016-08-10	9	1	16:35:52	06:50:52	00:22:29	Lob	S_attempt	B	6
2016-08-10	9	1	16:36:07	06:51:07	00:22:44	Lob	exit	B	2
2016-08-10	9	1	16:39:32	06:54:32	00:26:09	Lob	F_attempt	E	45
2016-08-10	9	1	16:40:53	06:55:53	00:27:30	Lob	F_attempt	E	194
2016-08-10	9	1	16:41:46	06:56:46	00:28:23	Lob	F_attempt	B	10
2016-08-10	9	1	16:44:20	06:59:20	00:30:57	Lob	S_attempt	B	61
2016-08-10	9	1	16:46:01	07:01:01	00:32:38	Lob	exit	K	1
2016-08-10	9	1	16:48:47	07:03:47	00:00:01	Lob	feeding		111
2016-08-10	9	1	16:49:17	07:04:17	00:00:31	Lob	S_attempt	E	9
2016-08-10	9	1	16:49:27	07:04:27	00:00:41	Lob	exit	E	1
2016-08-10	9	1	16:49:42	07:04:42	00:00:56	Lob	S_attempt	E	65
2016-08-10	9	1	16:54:04	07:09:04	00:05:18	Lob	feeding		100
2016-08-10	9	1	16:57:07	07:12:07	00:08:21	Lob	F_attempt	T	17
2016-08-10	9	1	17:00:52	07:15:52	00:12:06	Lob	feeding		99
2016-08-10	9	1	17:02:22	07:17:22	00:13:36	Lob	exit	B	1
2016-08-10	9	1	17:02:43	07:17:43	00:13:57	Lob	feeding		430
2016-08-10	9	1	17:10:37	07:25:37	00:21:51	Lob	feeding		260
2016-08-10	9	1	17:11:24	07:26:24	00:22:38	Lob	F_attempt	B	12
2016-08-10	9	1	17:12:59	07:27:59	00:24:13	Lob	F_attempt	B	6
2016-08-10	9	1	17:17:09	07:32:09	00:28:23	Lob	feeding		42
2016-08-10	9	1	17:18:03	07:33:03	00:29:17	Lob	F_attempt	E	41
2016-08-10	9	1	17:19:46	07:34:46	00:31:00	Lob	feeding		88
2016-08-10	9	1	17:21:58	07:36:58	00:33:12	Lob	feeding		871
2016-08-10	9	1	17:30:02	07:45:02	00:05:53	Lob	S_attempt	B	4
2016-08-10	9	1	17:31:10	07:46:10	00:07:01	Lob	F_attempt	B	7
2016-08-10	9	1	17:31:21	07:46:21	00:07:12	Lob	exit	T	1
2016-08-10	9	1	17:36:34	07:51:34	00:12:25	Lob	F_attempt	E	31
2016-08-10	9	1	17:38:21	07:53:21	00:14:12	Lob	feeding		755
2016-08-10	9	1	17:38:48	07:53:48	00:14:39	Lob	F_attempt	B	5
2016-08-10	9	1	17:51:01	08:06:01	00:26:52	Lob	F_attempt	E	8
2016-08-10	9	1	17:51:31	08:06:31	00:27:22	Lob	F_attempt	E	23
2016-08-10	9	1	17:53:29	08:08:29	00:29:20	Lob	feeding		54
2016-08-10	9	1	17:54:25	08:09:25	00:30:16	Lob	F_attempt	E	28
2016-08-10	9	1	17:56:27	08:11:27	00:32:18	Lob	F_attempt	E	17
2016-08-10	9	1	17:57:30	08:12:30	00:33:21	Lob	F_attempt	E	4
2016-08-10	9	1	17:58:25	08:13:25	00:34:16	Lob	feeding		12
2016-08-10	9	1	17:59:53	08:14:53	00:00:21	Lob	feeding		449
2016-08-10	9	1	18:04:43	08:19:43	00:05:11	Lob	F_attempt	B	5
2016-08-10	9	1	18:07:31	08:22:31	00:07:59	Lob	F_attempt	E	38
2016-08-10	9	1	18:09:06	08:24:06	00:09:34	Lob	feeding		77
2016-08-10	9	1	18:10:04	08:25:04	00:10:32	Lob	F_attempt	E	82
2016-08-10	9	1	18:12:38	08:27:38	00:13:06	Lob	feeding		240
2016-08-10	9	1	18:18:23	08:33:23	00:18:51	Lob	feeding		101
2016-08-10	9	1	18:20:35	08:35:35	00:21:03	Lob	F_attempt	T	10
2016-08-10	9	1	18:21:33	08:36:33	00:22:01	Lob	F_attempt	T	11
2016-08-10	9	1	18:22:27	08:37:27	00:22:55	Lob	F_attempt	T	13
2016-08-10	9	1	18:22:31	08:37:31	00:22:59	Lob	feeding		43
2016-08-10	9	1	18:22:34	08:37:34	00:23:02	Lob	F_attempt	T	6
2016-08-10	9	1	18:31:57	08:46:57	00:32:25	Lob	feeding		131
2016-08-10	9	1	18:34:59	08:49:59	00:00:04	Lob	feeding		303
2016-08-10	9	1	18:37:36	08:52:36	00:02:41	Lob	F_attempt	E	17
2016-08-10	9	1	18:48:10	09:03:10	00:13:15	Lob	S_attempt	B	8
2016-08-10	9	1	18:48:29	09:03:29	00:13:34	Lob	exit	B	2
2016-08-10	9	1	18:48:46	09:03:46	00:13:51	Lob	S_attempt	B	6
2016-08-10	9	1	18:48:57	09:03:57	00:14:02	Lob	F_attempt	E	12
2016-08-10	9	1	18:49:35	09:04:35	00:14:40	Lob	F_attempt	B	4
2016-08-10	9	1	18:49:50	09:04:50	00:14:55	Lob	exit	B	1
2016-08-10	9	1	18:50:48	09:05:48	00:15:53	Lob	F_attempt	B	9
2016-08-10	9	1	18:51:11	09:06:11	00:16:16	Lob	S_attempt	B	18
2016-08-10	9	1	18:51:47	09:06:47	00:16:52	Lob	exit	B	1
2016-08-10	9	1	18:53:54	09:08:54	00:18:59	Lob	F_attempt	B	7
2016-08-10	9	1	18:54:17	09:09:17	00:19:22	Lob	S_attempt	E	60
2016-08-10	9	1	18:55:31	09:10:31	00:20:36	Lob	feeding		146
2016-08-10	9	1	18:57:50	09:12:50	00:22:55	GC-Lob	aggression		41
2016-08-10	9	1	18:58:54	09:13:54	00:23:59	Lob	feeding		227
2016-08-10	9	1	19:19:52	09:34:52	00:09:34	Lob	S_attempt	B	77
2016-08-10	9	1	19:20:39	09:35:39	00:10:21	Lob	S_attempt	T	5
2016-08-10	9	1	19:20:52	09:35:52	00:10:34	Lob	exit	T	4
2016-08-10	9	1	19:22:23	09:37:23	00:12:05	Lob	F_attempt	E	24
2016-08-10	9	1	19:23:53	09:38:53	00:13:35	Lob	F_attempt	B	34
2016-08-10	9	1	19:30:03	09:45:03	00:19:45	Lob	S_attempt	B	2
2016-08-10	9	1	19:30:40	09:45:40	00:20:22	Lob	exit	B	1
2016-08-10	9	1	19:33:07	09:48:07	00:22:49	Lob	S_attempt	B	9
2016-08-10	9	1	19:33:19	09:48:19	00:23:01	Lob	exit	B	1
2016-08-10	9	1	19:37:52	09:52:52	00:27:34	Lob	S_attempt	B	7
2016-08-10	9	1	19:38:15	09:53:15	00:27:57	Lob	exit	B	1
2016-08-10	9	1	19:41:42	09:56:42	00:31:24	Lob	F_attempt	T	10
2016-08-10	9	1	19:41:59	09:56:59	00:31:41	Lob	F_attempt	T	17
2016-08-10	9	1	19:48:27	10:03:27	00:02:46	Lob	F_attempt	E	166
2016-08-10	9	1	19:50:39	10:05:39	00:04:58	Lob	S_attempt	B	9
2016-08-10	9	1	19:51:36	10:06:36	00:05:55	Lob	exit	B	3
2016-08-10	9	1	19:52:12	10:07:12	00:06:31	Lob	F_attempt	T	9
2016-08-10	9	1	19:53:20	10:08:20	00:07:39	Lob	S_attempt	B	10
2016-08-10	9	1	19:53:38	10:08:38	00:07:57	Lob	exit	B	2
2016-08-10	9	1	19:54:32	10:09:32	00:08:51	Lob	F_attempt	B	7
2016-08-10	9	1	19:56:18	10:11:18	00:10:37	Lob	F_attempt	B	10
2016-08-10	9	1	19:56:39	10:11:39	00:10:58	Lob	S_attempt	B	5
2016-08-10	9	1	19:57:13	10:12:13	00:11:32	Lob	exit	B	2
2016-08-10	9	1	19:59:41	10:14:41	00:14:00	Lob	F_attempt	B	14
2016-08-10	9	1	20:13:34	10:28:34	00:27:53	Lob	F_attempt	T	18
2016-08-10	9	1	20:16:21	10:31:21	00:30:40	Lob	S_attempt	B	9
2016-08-10	9	1	20:16:56	10:31:56	00:31:15	Lob	exit	B	1
2016-08-10	9	1	20:17:39	10:32:39	00:31:58	Lob	S_attempt	B	41
2016-08-10	9	1	20:18:27	10:33:27	00:32:46	Lob	exit	B	1
2016-08-10	9	1	20:26:21	10:40:21	00:05:17	Lob	S_attempt	B	3
2016-08-10	9	1	20:26:33	10:40:33	00:05:29	Lob	exit	B	7
2016-08-10	9	1	20:34:30	10:48:30	00:13:26	Lob	F_attempt	B	12
2016-08-10	9	1	20:35:20	10:49:20	00:14:16	Lob	S_attempt	B	14
2016-08-10	9	1	20:35:56	10:49:56	00:14:52	Lob	exit	B	1
2016-08-10	9	1	20:37:01	10:51:01	00:15:57	Lob	F_attempt	E	127
2016-08-10	9	1	20:41:32	10:55:32	00:20:28	Lob	F_attempt	B	11
2016-08-10	9	1	20:44:04	10:58:04	00:23:00		end			4
2016-08-11	10	1	09:13:00	00:00:00	00:00:30		start
2016-08-11	10	1	09:18:21	00:05:21	00:05:51	Lob	S_attempt	B	8
2016-08-11	10	1	09:20:15	00:07:15	00:07:45	Lob	exit	T	3
2016-08-11	10	1	09:22:01	00:09:01	00:09:31	Lob	S_attempt	T	2
2016-08-11	10	1	09:22:36	00:09:36	00:10:06	Lob	exit	T	3
2016-08-11	10	1	09:28:31	00:15:31	00:16:01	Lob	F_attempt	E	71
2016-08-11	10	1	09:30:44	00:17:44	00:18:14	Lob	F_attempt	E	72
2016-08-11	10	1	09:32:13	00:19:13	00:19:43	Lob	S_attempt	B	23
2016-08-11	10	1	09:33:37	00:20:37	00:21:07	Lob	F_attempt	E	72
2016-08-11	10	1	09:35:48	00:22:48	00:23:18	Lob	exit	B	2
2016-08-11	10	1	09:36:41	00:23:41	00:24:11	Lob	F_attempt	E	591
2016-08-11	10	1	09:47:15	00:34:15	00:34:45	Lob	F_attempt	E	14
2016-08-11	10	1	09:47:41	00:34:41	00:35:11	Lob	F_attempt	E	3
2016-08-11	10	1	09:47:57	00:34:57	00:00:04	Lob	F_attempt	E	77
2016-08-11	10	1	09:49:45	00:36:45	00:01:52	Lob	S_attempt	E	15
2016-08-11	10	1	09:53:36	00:40:36	00:05:43	Lob	S_attempt	B	5
2016-08-11	10	1	09:57:02	00:44:02	00:09:09	Lob	exit	B	3
2016-08-11	10	1	10:00:53	00:47:53	00:13:00	Lob	F_attempt	E	157
2016-08-11	10	1	10:04:01	00:51:01	00:16:08	Lob	F_attempt	E	111
2016-08-11	10	1	10:07:07	00:54:07	00:19:14	Lob	F_attempt	E	60
2016-08-11	10	1	10:09:34	00:56:34	00:21:41	Lob	F_attempt	E	258
2016-08-11	10	1	10:18:09	01:05:09	00:30:16	Lob	F_attempt	E	268
2016-08-11	10	1	10:27:17	01:14:17	00:04:01	Lob	S_attempt	E	214
2016-08-11	10	1	10:31:16	01:18:16	00:08:00	Lob	feeding		8
2016-08-11	10	1	10:37:41	01:24:41	00:14:25	Lob	exit	B	6
2016-08-11	10	1	10:49:52	01:36:52	00:26:36	Lob	S_attempt	T	13
2016-08-11	10	1	10:50:35	01:37:35	00:27:19	Lob	exit	T	3
2016-08-11	10	1	11:01:49	01:48:49	00:03:10	Lob	F_attempt	B	35
2016-08-11	10	1	11:02:52	01:49:52	00:04:13	Lob	exit	B	7
2016-08-11	10	1	11:16:29	02:03:29	00:17:50	Lob	S_attempt	T	5
2016-08-11	10	1	11:18:12	02:05:12	00:19:33	Lob	F_attempt	E	16
2016-08-11	10	1	11:19:38	02:06:38	00:20:59	Lob	exit	T	2
2016-08-11	10	1	11:33:35	02:20:35	00:34:56	Lob	F_attempt	E	398
2016-08-11	10	1	11:53:11	02:40:11	00:19:09	Lob	F_attempt	E	923
2016-08-11	10	1	11:53:17	02:40:17	00:19:15	DIVE	DIVE
2016-08-11	10	1	12:10:10	02:57:10	00:00:45	Lob	F_attempt	E	449
2016-08-11	10	1	12:13:26	03:00:26	00:04:01	DIVE	DIVE
2016-08-11	10	1	12:26:32	03:13:32	00:17:07	Lob	F_attempt	E	27
2016-08-11	10	1	12:40:54	03:27:54	00:31:29	Lob	S_attempt	E	397
2016-08-11	10	1	12:47:53	03:34:53	00:03:05	Lob	feeding		179
2016-08-11	10	1	12:51:01	03:38:01	00:06:13	GC-Lob	aggression		9
2016-08-11	10	1	12:52:43	03:39:43	00:07:55	Lob	feeding		498
2016-08-11	10	1	13:01:38	03:48:38	00:16:50	Lob	feeding		149
2016-08-11	10	1	13:04:59	03:51:59	00:20:11	Lob	feeding		799
2016-08-11	10	1	13:14:44	04:01:44	00:29:56	Lob	S_attempt	B	6
2016-08-11	10	1	13:15:07	04:02:07	00:30:19	Lob	exit	T	1
2016-08-11	10	1	13:18:33	04:05:33	00:33:45	Lob	feeding		562
2016-08-11	10	1	13:19:45	04:06:45	00:34:57	Lob	S_attempt	B	15
2016-08-11	10	1	13:20:15	04:07:15	00:00:04	Lob	exit	B	3
2016-08-11	10	1	13:28:26	04:15:26	00:08:15	Lob	feeding		95
2016-08-11	10	1	13:31:02	04:18:02	00:10:51	Lob	feeding		1348
2016-08-11	10	1	13:32:11	04:19:11	00:12:00	Lob	S_attempt	B	9
2016-08-11	10	1	13:32:27	04:19:27	00:12:16	Lob	exit	B	4
2016-08-11	10	1	13:53:54	04:40:54	00:33:43	Lob	feeding		645
2016-08-11	10	1	13:57:04	04:44:04	00:01:30	Lob	F_attempt	E	69
2016-08-11	10	1	14:05:09	04:52:09	00:09:35	Lob	feeding		202
2016-08-11	10	1	14:09:19	04:56:19	00:13:45	Lob	feeding		346
2016-08-11	10	1	14:23:29	05:10:29	00:27:55	Lob	feeding		1406
2016-08-11	10	1	14:50:24	05:37:24	00:19:27	Lob	feeding		75
2016-08-11	10	1	14:59:22	05:46:22	00:28:25	Lob	feeding		318
2016-08-11	10	1	15:12:16	05:59:16	00:05:56	Lob	feeding		70
2016-08-11	10	1	15:17:18	06:04:18	00:10:58	Lob	feeding		529
2016-08-11	10	1	15:34:39	06:21:39	00:28:19	Lob	feeding		107
2016-08-11	10	1	15:38:38	06:25:38	00:32:18	Lob	S_attempt	B	56
2016-08-11	10	1	15:39:20	06:26:20	00:33:00	BAIT DEPL	BAIT DEPL
2016-08-11	10	1	15:40:18	06:27:18	00:33:58	Lob	exit	B	2
2016-08-11	10	1	15:49:02	06:36:02	00:07:19	Lob	S_attempt	B	6
2016-08-11	10	1	15:49:25	06:36:25	00:07:42	Lob	exit	B	2
2016-08-11	10	1	15:49:53	06:36:53	00:08:10	Lob	S_attempt	T	7
2016-08-11	10	1	15:50:21	06:37:21	00:08:38	Lob	S_attempt	B	7
2016-08-11	10	1	15:50:45	06:37:45	00:09:02	Lob	exit	T	2
2016-08-11	10	1	15:54:18	06:41:18	00:12:35	Lob	exit	B	4
2016-08-11	10	1	15:56:55	06:43:55	00:15:12	Lob	feeding		63
2016-08-11	10	1	16:07:43	06:54:43	00:26:00	Lob	S_attempt	B	9
2016-08-11	10	1	16:09:34	06:56:34	00:27:51	Lob	exit	T	2
2016-08-11	10	1	16:11:12	06:58:12	00:29:29	Lob	S_attempt	B	5
2016-08-11	10	1	16:12:36	06:59:36	00:30:53	Lob	exit	B	2
2016-08-11	10	1	16:13:18	07:00:18	00:31:35	Lob	S_attempt	B	10
2016-08-11	10	1	16:16:23	07:03:23	00:34:40	Lob	exit	B	4
2016-08-11	10	1	16:16:52	07:03:52	00:35:09	Lob	S_attempt	T	10
2016-08-11	10	1	16:17:48	07:04:48	00:00:42	Lob	S_attempt	B	12
2016-08-11	10	1	16:20:08	07:07:08	00:03:02	Lob	exit	B	12
2016-08-11	10	1	16:24:53	07:11:53	00:07:47	Lob	exit	T	3
2016-08-11	10	1	16:31:04	07:18:04	00:13:58	Lob	F_attempt	E	31
2016-08-11	10	1	16:38:49	07:25:49	00:21:43	Lob	S_attempt	T	9
2016-08-11	10	1	16:39:58	07:26:58	00:22:52	Lob	exit	T	1
2016-08-11	10	1	17:33:46	08:20:46	00:05:54	Lob	exit	B	3
2016-08-11	10	1	18:00:16	08:47:16	00:32:24	Lob	S_attempt	T	9
2016-08-11	10	1	18:02:13	08:49:13	00:34:21	Lob	exit	T	3
2016-08-11	10	1	18:03:27	08:50:27	00:00:12	Lob	S_attempt	T	9
2016-08-11	10	1	18:03:46	08:50:46	00:00:31	Lob	exit	T	3
2016-08-11	10	1	18:05:38	08:52:38	00:02:23	Lob	S_attempt	T	6
2016-08-11	10	1	18:08:13	08:55:13	00:04:58	Lob	exit	T	1
2016-08-11	10	1	18:09:04	08:56:04	00:05:49	Lob	F_attempt	E	19
2016-08-11	10	1	18:09:52	08:56:52	00:06:37	Lob	F_attempt	E	191
2016-08-11	10	1	18:13:48	09:00:48	00:10:33	Lob	S_attempt	T	8
2016-08-11	10	1	18:25:09	09:12:09	00:21:54	Lob	exit	T	5
2016-08-11	10	1	18:26:04	09:13:04	00:22:49	Lob	F_attempt	E	429
2016-08-11	10	1	18:27:36	09:14:36	00:24:21	GC-Lob	aggression		26
2016-08-11	10	1	18:28:59	09:15:59	00:25:44	GC-Lob	aggression		29
2016-08-11	10	1	18:34:59	09:21:59	00:31:44	Lob	S_attempt	T	9
2016-08-11	10	1	18:35:50	09:22:50	00:32:35	Lob	exit	T	1
2016-08-11	10	1	18:36:00	09:23:00	00:32:45	Lob	S_attempt	T	11
2016-08-11	10	1	18:36:45	09:23:45	00:33:30	Lob	exit	T	3
2016-08-11	10	1	18:53:00	09:40:00	00:14:22	Lob	S_attempt	E	213
2016-08-11	10	1	18:56:49	09:43:49	00:18:11	GC-Lob	aggression		3471
2016-08-11	10	1	19:55:29	10:42:29	00:06:05	GC-Lob	aggression		983
2016-08-11	10	1	20:03:17	10:50:17	00:13:53	Lob	S_attempt	T	3
2016-08-11	10	1	20:03:39	10:50:39	00:14:15	Lob	exit	T	3
2016-08-11	10	1	20:08:57	10:55:57	00:19:33	Lob	F_attempt	E	9
2016-08-11	10	1	20:09:57	10:56:57	00:20:33	Lob	S_attempt	K	8
2016-08-11	10	1	20:13:12	11:00:12	00:23:48	Lob	exit	T	2
2016-08-11	10	1	20:30:10	11:17:10	00:05:23		end
2016-08-22	11	1	14:50:00	00:00:00	00:02:00		start
2016-08-22	11	1	14:56:49	00:06:49	00:08:49	GC-Lob	aggression		3
2016-08-22	11	1	15:09:24	00:19:24	00:21:24	GC-Lob	feeding		1513
2016-08-22	11	1	15:12:07	00:22:07	00:24:07	Lob	S_attempt	B	5
2016-08-22	11	1	15:14:42	00:24:42	00:26:42	Lob	exit	B	1
2016-08-22	11	1	15:15:33	00:25:33	00:27:33	Lob	F_attempt	E	181
2016-08-22	11	1	15:16:04	00:26:04	00:28:04	Lob	feeding		100
2016-08-22	11	1	15:22:11	00:32:11	00:34:11	Lob	S_attempt	B	4
2016-08-22	11	1	15:24:09	00:34:09	00:00:46	Lob	exit	B	1
2016-08-22	11	1	15:26:09	00:36:09	00:02:46	Lob	S_attempt	E	92
2016-08-22	11	1	15:27:45	00:37:45	00:04:22	Lob	feeding		170
2016-08-22	11	1	15:31:49	00:41:49	00:08:26	Lob	exit	B	3
2016-08-22	11	1	15:33:50	00:43:50	00:10:27	Lob	S_attempt	B	4
2016-08-22	11	1	15:34:37	00:44:37	00:11:14	Lob	feeding		17
2016-08-22	11	1	15:35:11	00:45:11	00:11:48	Lob	exit	B	1
2016-08-22	11	1	15:36:21	00:46:21	00:12:58	Lob	S_attempt	B	6
2016-08-22	11	1	15:36:56	00:46:56	00:13:33	Lob	exit	B	2
2016-08-22	11	1	15:37:11	00:47:11	00:13:48	Lob	S_attempt	B	2
2016-08-22	11	1	15:37:39	00:47:39	00:14:16	Lob	feeding		64
2016-08-22	11	1	15:39:04	00:49:04	00:15:41	Lob	exit	B	1
2016-08-22	11	1	15:39:34	00:49:34	00:16:11	Lob	S_attempt	B	5
2016-08-22	11	1	15:40:49	00:50:49	00:17:26	Lob	exit	B	3
2016-08-22	11	1	15:44:43	00:54:43	00:21:20	Lob	S_attempt	T	4
2016-08-22	11	1	15:44:49	00:54:49	00:21:26	Lob	exit	T	1
2016-08-22	11	1	15:45:25	00:55:25	00:22:02	Lob	S_attempt	B	7
2016-08-22	11	1	15:45:33	00:55:33	00:22:10	Lob	feeding		33
2016-08-22	11	1	15:47:40	00:57:40	00:24:17	Lob	feeding		24
2016-08-22	11	1	15:48:20	00:58:20	00:24:57	Lob	F_attempt	B	3
2016-08-22	11	1	15:48:38	00:58:38	00:25:15	Lob	exit	E	1
2016-08-22	11	1	15:48:56	00:58:56	00:25:33	Lob	F_attempt	E	3
2016-08-22	11	1	15:49:12	00:59:12	00:25:49	Lob	F_attempt	E	18
2016-08-22	11	1	15:51:28	01:01:28	00:28:05	Lob	F_attempt	E	14
2016-08-22	11	1	15:54:12	01:04:12	00:30:49	GC	feeding		25
2016-08-22	11	1	15:55:05	01:05:05	00:31:42	GC	feeding		236
2016-08-22	11	1	15:56:24	01:06:24	00:33:01	Lob	S_attempt	B	3
2016-08-22	11	1	15:56:37	01:06:37	00:33:14	Lob	S_attempt	T	4
2016-08-22	11	1	15:56:42	01:06:42	00:33:19	Lob	F_attempt	B	10
2016-08-22	11	1	15:56:58	01:06:58	00:33:35	Lob	exit	E	1
2016-08-22	11	1	15:57:08	01:07:08	00:33:45	Lob	F_attempt	E	148
2016-08-22	11	1	15:59:19	01:09:19	00:00:33	Lob	exit	B	1
2016-08-22	11	1	15:59:43	01:09:43	00:00:57	Lob	S_attempt	E	99
2016-08-22	11	1	16:00:37	01:10:37	00:01:51	Lob	feeding		681
2016-08-22	11	1	16:05:46	01:15:46	00:07:00	Lob	F_attempt	E	11
2016-08-22	11	1	16:06:34	01:16:34	00:07:48	Lob	F_attempt	E	131
2016-08-22	11	1	16:11:27	01:21:27	00:12:41	Lob	F_attempt	E	47
2016-08-22	11	1	16:11:59	01:21:59	00:13:13	Lob	feeding		16
2016-08-22	11	1	16:12:02	01:22:02	00:13:16	Lob	S_attempt	B	5
2016-08-22	11	1	16:12:19	01:22:19	00:13:33	Lob	exit	E	1
2016-08-22	11	1	16:12:42	01:22:42	00:13:56	Lob	feeding		285
2016-08-22	11	1	16:13:11	01:23:11	00:14:25	Lob	exit	B	2
2016-08-22	11	1	16:18:13	01:28:13	00:19:27	Lob	feeding		26
2016-08-22	11	1	16:18:58	01:28:58	00:20:12	Lob	S_attempt	T	3
2016-08-22	11	1	16:19:23	01:29:23	00:20:37	Lob	feeding		313
2016-08-22	11	1	16:21:53	01:31:53	00:23:07	Lob	exit	T	3
2016-08-22	11	1	16:22:06	01:32:06	00:23:20	Lob	S_attempt	T	4
2016-08-22	11	1	16:22:18	01:32:18	00:23:32	Lob	exit	B	2
2016-08-22	11	1	16:23:42	01:33:42	00:24:56	Lob	S_attempt	T	3
2016-08-22	11	1	16:24:16	01:34:16	00:25:30	Lob	exit	B	1
2016-08-22	11	1	16:32:35	01:42:35	00:33:49	Lob	F_attempt	E	8
2016-08-22	11	1	16:36:30	01:46:30	00:02:21	GC	feeding		156
2016-08-22	11	1	16:36:31	01:46:31	00:02:22	Lob	S_attempt	T	3
2016-08-22	11	1	16:38:05	01:48:05	00:03:56	Lob	F_attempt	E	96
2016-08-22	11	1	16:38:08	01:48:08	00:03:59	Lob	exit	T	1
2016-08-22	11	1	16:41:47	01:51:47	00:07:38	Lob	feeding		109
2016-08-22	11	1	16:42:59	01:52:59	00:08:50	Lob	S_attempt	T	7
2016-08-22	11	1	16:44:36	01:54:36	00:10:27	Lob	feeding		15
2016-08-22	11	1	16:45:37	01:55:37	00:11:28	Lob	feeding		78
2016-08-22	11	1	16:47:16	01:57:16	00:13:07	Lob	feeding		113
2016-08-22	11	1	16:48:00	01:58:00	00:13:51	Lob	exit	P	1
2016-08-22	11	1	16:49:33	01:59:33	00:15:24	Lob	feeding		51
2016-08-22	11	1	16:50:16	02:00:16	00:16:07	Lob	S_attempt	B	4
2016-08-22	11	1	16:50:50	02:00:50	00:16:41	Lob	exit	B	1
2016-08-22	11	1	16:56:59	02:06:59	00:22:50	Lob	F_attempt	E	117
2016-08-22	11	1	17:06:28	02:16:28	00:32:19	GC-Lob	aggression		15
2016-08-22	11	1	17:07:48	02:17:48	00:33:39	GC-Lob	aggression		4
2016-08-22	11	1	17:09:28	02:19:28	00:35:19	Lob	S_attempt	E	327
2016-08-22	11	1	17:15:40	02:25:40	00:06:08	Lob	F_attempt	E	118
2016-08-22	11	1	17:17:53	02:27:53	00:08:21	Lob	F_attempt	E	856
2016-08-22	11	1	17:34:27	02:44:27	00:24:55	Lob	S_attempt	E	194
2016-08-22	11	1	17:37:55	02:47:55	00:28:23	Lob	feeding		35
2016-08-22	11	1	17:39:19	02:49:19	00:29:47	GC	feeding		20
2016-08-22	11	1	17:41:49	02:51:49	00:32:17	Lob	feeding		199
2016-08-22	11	1	17:45:22	02:55:22	00:00:27	Lob	feeding		6
2016-08-22	11	1	17:47:04	02:57:04	00:02:09	Lob	exit	B	2
2016-08-22	11	1	18:01:14	03:11:14	00:16:19	Lob	S_attempt	E	343
2016-08-22	11	1	18:07:07	03:17:07	00:22:12	Lob	feeding		722
2016-08-22	11	1	18:12:26	03:22:26	00:27:31	Lob	F_attempt	E	16
2016-08-22	11	1	18:15:23	03:25:23	00:30:28	Lob	F_attempt	E	8
2016-08-22	11	1	18:16:59	03:26:59	00:32:04	Lob	F_attempt	E	10
2016-08-22	11	1	18:19:03	03:29:03	00:34:08	Lob	F_attempt	E	16
2016-08-22	11	1	18:41:44	03:51:44	00:21:26	Lob	S_attempt	E	195
2016-08-22	11	1	18:45:47	03:55:47	00:25:29	Lob	feeding		14
2016-08-22	11	1	18:46:27	03:56:27	00:26:09	Lob	feeding		34
2016-08-22	11	1	19:03:34	04:13:34	00:07:53	Lob	exit	B	26
2016-08-22	11	1	19:12:54	04:22:54	00:17:13	Lob	S_attempt	E	75
2016-08-22	11	1	19:14:15	04:24:15	00:18:34	Lob	exit	E	4
2016-08-22	11	1	19:29:24	04:39:24	00:33:43	Lob	F_attempt	E	309
2016-08-22	11	1	19:30:14	04:40:14	00:34:33	Lob	S_attempt	B	6
2016-08-22	11	1	19:30:23	04:40:23	00:34:42	Lob	exit	B	1
2016-08-22	11	1	19:47:40	04:57:40	00:16:36	Lob	F_attempt	E	214
2016-08-22	11	1	20:01:21	05:11:21	00:30:17	Lob	S_attempt	E	363
2016-08-22	11	1	20:07:43	05:17:43	00:01:16	Lob	feeding		16
2016-08-22	11	1	20:17:00	05:27:00	00:10:33		end			6
2016-08-23	12	1	09:17:00	00:00:00	00:01:00		start
2016-08-23	12	1	09:19:35	00:02:35	00:03:35	GC	feeding		165
2016-08-23	12	1	09:20:01	00:03:01	00:04:01	Lob	S_attempt	E	41
2016-08-23	12	1	09:21:35	00:04:35	00:05:35	Lob	feeding		376
2016-08-23	12	1	09:25:13	00:08:13	00:09:13	Lob	S_attempt	T	1
2016-08-23	12	1	09:27:56	00:10:56	00:11:56	Lob	F_attempt	E	629
2016-08-23	12	1	09:28:11	00:11:11	00:12:11	Lob	feeding		87
2016-08-23	12	1	09:28:23	00:11:23	00:12:23	Lob	S_attempt	T	8
2016-08-23	12	1	09:28:47	00:11:47	00:12:47	Lob	exit	T	6
2016-08-23	12	1	09:29:36	00:12:36	00:13:36	Lob	S_attempt	T	5
2016-08-23	12	1	09:29:58	00:12:58	00:13:58	Lob	exit	B	2
2016-08-23	12	1	09:34:39	00:17:39	00:18:39	Lob	exit	P	6
2016-08-23	12	1	09:38:01	00:21:01	00:22:01	Lob	F_attempt	T	3
2016-08-23	12	1	09:39:02	00:22:02	00:23:02	Lob	S_attempt	E	69
2016-08-23	12	1	09:40:11	00:23:11	00:24:11	Lob	feeding		33
2016-08-23	12	1	09:40:58	00:23:58	00:24:58	Lob	S_attempt	B	5
2016-08-23	12	1	09:41:51	00:24:51	00:25:51	Lob	exit	B	2
2016-08-23	12	1	09:43:37	00:26:37	00:27:37	Lob	exit	T	2
2016-08-23	12	1	09:47:16	00:30:16	00:31:16	Lob	S_attempt	T	4
2016-08-23	12	1	09:47:37	00:30:37	00:31:37	Lob	exit	T	1
2016-08-23	12	1	09:50:14	00:33:14	00:34:14	Lob	S_attempt	E	267
2016-08-23	12	1	09:54:42	00:37:42	00:03:19	Lob	feeding		263
2016-08-23	12	1	09:55:00	00:38:00	00:03:37	Lob	F_attempt	E	21
2016-08-23	12	1	10:00:08	00:43:08	00:08:45	Lob	feeding		68
2016-08-23	12	1	10:01:24	00:44:24	00:10:01	Lob	F_attempt	E	9
2016-08-23	12	1	10:01:50	00:44:50	00:10:27	Lob	F_attempt	E	38
2016-08-23	12	1	10:06:13	00:49:13	00:14:50	Lob	F_attempt	E	49
2016-08-23	12	1	10:08:57	00:51:57	00:17:34	Lob	S_attempt	E	161
2016-08-23	12	1	10:11:45	00:54:45	00:20:22	Lob	feeding		28
2016-08-23	12	1	10:12:36	00:55:36	00:21:13	Lob	feeding		346
2016-08-23	12	1	10:18:39	01:01:39	00:27:16	Lob	feeding		54
2016-08-23	12	1	10:20:20	01:03:20	00:28:57	Lob	feeding		115
2016-08-23	12	1	10:22:27	01:05:27	00:31:04	Lob	S_attempt	E	18
2016-08-23	12	1	10:22:58	01:05:58	00:31:35	Lob	feeding		74
2016-08-23	12	1	10:26:27	01:09:27	00:35:04	Lob	feeding		90
2016-08-23	12	1	10:27:26	01:10:26	00:00:40	Lob	F_attempt	E	77
2016-08-23	12	1	10:27:41	01:10:41	00:00:55	Lob	exit	B	4
2016-08-23	12	1	10:29:45	01:12:45	00:02:59	Lob	F_attempt	E	19
2016-08-23	12	1	10:31:21	01:14:21	00:04:35	Lob	F_attempt	E	35
2016-08-23	12	1	10:32:50	01:15:50	00:06:04	Lob	F_attempt	E	404
2016-08-23	12	1	10:40:17	01:23:17	00:13:31	Lob	F_attempt	E	206
2016-08-23	12	1	10:44:10	01:27:10	00:17:24	Lob	F_attempt	E	84
2016-08-23	12	1	10:45:41	01:28:41	00:18:55	Lob	F_attempt	E	172
2016-08-23	12	1	10:49:07	01:32:07	00:22:21	Lob	F_attempt	E	20
2016-08-23	12	1	10:50:07	01:33:07	00:23:21	Lob	F_attempt	E	46
2016-08-23	12	1	10:52:38	01:35:38	00:25:52	Lob	F_attempt	E	114
2016-08-23	12	1	10:53:52	01:36:52	00:27:06	DIVE	DIVE
2016-08-23	12	1	10:55:05	01:38:05	00:28:19	Lob	F_attempt	E	304
2016-08-23	12	1	11:01:25	01:44:25	00:34:39	Lob	F_attempt	E	25
2016-08-23	12	1	11:02:59	01:45:59	00:00:50	Lob	F_attempt	E	417
2016-08-23	12	1	11:10:09	01:53:09	00:08:00	DIVE	DIVE
2016-08-23	12	1	11:10:28	01:53:28	00:08:19	Lob	F_attempt	E	369
2016-08-23	12	1	11:11:45	01:54:45	00:09:36	GC-Lob	aggression		7
2016-08-23	12	1	11:16:17	01:59:17	00:14:08	Lob	feeding		22
2016-08-23	12	1	11:16:46	01:59:46	00:14:37	GC-Lob	aggression		20
2016-08-23	12	1	11:18:08	02:01:08	00:15:59	Lob	F_attempt	E	69
2016-08-23	12	1	11:21:29	02:04:29	00:19:20	GC-Lob	aggression		11
2016-08-23	12	1	11:28:43	02:11:43	00:26:34	Lob	F_attempt	E	24
2016-08-23	12	1	11:31:42	02:14:42	00:29:33	Lob	F_attempt	E	4
2016-08-23	12	1	11:33:14	02:16:14	00:31:05	Lob	F_attempt	E	50
2016-08-23	12	1	11:36:18	02:19:18	00:34:09	Lob	F_attempt	E	33
2016-08-23	12	1	11:37:04	02:20:04	00:34:55	Lob	F_attempt	E	40
2016-08-23	12	1	11:40:29	02:23:29	00:02:57	Lob	F_attempt	E	36
2016-08-23	12	1	11:41:32	02:24:32	00:04:00	Lob	F_attempt	E	69
2016-08-23	12	1	11:44:33	02:27:33	00:07:01	Lob	F_attempt	E	111
2016-08-23	12	1	11:49:13	02:32:13	00:11:41	Lob	F_attempt	E	34
2016-08-23	12	1	11:50:19	02:33:19	00:12:47	Lob	S_attempt	E	13
2016-08-23	12	1	11:54:26	02:37:26	00:16:54	Lob	feeding		36
2016-08-23	12	1	11:55:06	02:38:06	00:17:34	Lob	F_attempt	E	17
2016-08-23	12	1	11:56:31	02:39:31	00:18:59	GC-Lob	aggression		28
2016-08-23	12	1	12:00:02	02:43:02	00:22:30	Lob	F_attempt	E	163
2016-08-23	12	1	12:04:42	02:47:42	00:27:10	Lob	F_attempt	E	42
2016-08-23	12	1	12:05:31	02:48:31	00:27:59	Lob	F_attempt	E	17
2016-08-23	12	1	12:09:13	02:52:13	00:31:41	Lob	S_attempt	E	53
2016-08-23	12	1	12:10:04	02:53:04	00:32:32	Lob	F_attempt	E	8
2016-08-23	12	1	12:10:54	02:53:54	00:33:22	Lob	exit	T	2
2016-08-23	12	1	12:17:01	03:00:01	00:04:06	Lob	S_attempt	E	84
2016-08-23	12	1	12:18:27	03:01:27	00:05:32	Lob	exit	E	1
2016-08-23	12	1	12:24:11	03:07:11	00:11:16	Lob	F_attempt	E	28
2016-08-23	12	1	12:24:57	03:07:57	00:12:02	Lob	F_attempt	E	18
2016-08-23	12	1	12:26:48	03:09:48	00:13:53	Lob	S_attempt	E	212
2016-08-23	12	1	12:34:00	03:17:00	00:21:05	Lob	F_attempt	E	43
2016-08-23	12	1	12:36:18	03:19:18	00:23:23	Lob	F_attempt	E	36
2016-08-23	12	1	12:51:24	03:34:24	00:03:06	Lob	exit	B	1
2016-08-23	12	1	12:52:05	03:35:05	00:03:47	Lob	F_attempt	E	92
2016-08-23	12	1	12:52:06	03:35:06	00:03:48	Lob	F_attempt	E	90
2016-08-23	12	1	12:55:48	03:38:48	00:07:30	Lob	F_attempt	E	56
2016-08-23	12	1	13:06:10	03:49:10	00:17:52	GC-Lob	aggression
2016-08-23	12	1	13:09:22	03:52:22	00:21:04	Lob	F_attempt	E	31
2016-08-23	12	1	13:14:13	03:57:13	00:25:55	Lob	F_attempt	E	21
2016-08-23	12	1	13:33:26	04:16:26	00:09:45	Lob	F_attempt	E	2
2016-08-23	12	1	13:40:01	04:23:01	00:16:20	Lob	feeding		8
2016-08-23	12	1	13:51:10	04:34:10	00:27:29	Lob	S_attempt	T	4
2016-08-23	12	1	13:51:38	04:34:38	00:27:57	Lob	feeding		3
2016-08-23	12	1	13:51:36	04:34:36	00:27:55	Lob	exit	T	34
2016-08-23	12	1	13:54:05	04:37:05	00:30:24	Lob	S_attempt	E	305
2016-08-23	12	1	14:14:58	04:57:58	00:15:54	Lob	F_attempt	E	30
2016-08-23	12	1	14:34:10	05:17:10	00:35:06	Lob	F_attempt	E	360
2016-08-23	12	1	14:40:58	05:23:58	00:06:31	Lob	F_attempt	E	279
2016-08-23	12	1	14:46:00	05:29:00	00:11:33	Lob	F_attempt	E	105
2016-08-23	12	1	14:48:16	05:31:16	00:13:49	Lob	S_attempt	E	504
2016-08-23	12	1	14:50:01	05:33:01	00:15:34	Lob	F_attempt	E	401
2016-08-23	12	1	14:50:11	05:33:11	00:15:44	Lob	S_attempt	B	14
2016-08-23	12	1	14:50:49	05:33:49	00:16:22	Lob	exit	K	2
2016-08-23	12	1	15:00:49	05:43:49	00:26:22	Lob	F_attempt	E	331
2016-08-23	12	1	15:06:46	05:49:46	00:32:19	Lob	F_attempt	E	68
2016-08-23	12	1	15:08:31	05:51:31	00:34:04	Lob	F_attempt	E	228
2016-08-23	12	1	15:13:42	05:56:42	00:03:52	Lob	F_attempt	E	54
2016-08-23	12	1	15:27:26	06:10:26	00:17:36	Lob	F_attempt	E	16
2016-08-23	12	1	15:28:45	06:11:45	00:18:55	Lob	F_attempt	E	35
2016-08-23	12	1	15:30:47	06:13:47	00:20:57	Lob	feeding		22
2016-08-23	12	1	15:37:43	06:20:43	00:27:53	Lob	feeding		161
2016-08-23	12	1	15:43:17	06:26:17	00:33:27	Lob	F_attempt	E	8
2016-08-23	12	1	15:44:05	06:27:05	00:34:15	Lob	F_attempt	E	22
2016-08-23	12	1	15:50:07	06:33:07	00:04:54	Lob	S_attempt	T	12
2016-08-23	12	1	15:51:18	06:34:18	00:06:05	Lob	exit	T	3
2016-08-23	12	1	15:51:53	06:34:53	00:06:40	Lob	S_attempt	T	11
2016-08-23	12	1	15:52:30	06:35:30	00:07:17	Lob	exit	T	2
2016-08-23	12	1	15:54:07	06:37:07	00:08:54	Lob	F_attempt	E	65
2016-08-23	12	1	15:56:55	06:39:55	00:11:42	Lob	S_attempt	T	16
2016-08-23	12	1	15:58:04	06:41:04	00:12:51	Lob	exit	T	2
2016-08-23	12	1	16:05:16	06:48:16	00:20:03	Lob	F_attempt	E	180
2016-08-23	12	1	16:08:58	06:51:58	00:23:45	Lob	S_attempt	T	7
2016-08-23	12	1	16:09:31	06:52:31	00:24:18	Lob	F_attempt	E	431
2016-08-23	12	1	16:19:42	07:02:42	00:34:29	Lob	F_attempt	E	117
2016-08-23	12	1	16:27:02	07:10:02	00:06:26	Lob	F_attempt	E	29
2016-08-23	12	1	16:28:50	07:11:50	00:08:14	Lob	F_attempt	E	291
2016-08-23	12	1	16:35:57	07:18:57	00:15:21	Lob	S_attempt	B	2
2016-08-23	12	1	16:36:01	07:19:01	00:15:25	Lob	F_attempt	E	364
2016-08-23	12	1	16:36:52	07:19:52	00:16:16	Lob	S_attempt	B	3
2016-08-23	12	1	16:37:09	07:20:09	00:16:33	Lob	exit	B	2
2016-08-23	12	1	16:38:22	07:21:22	00:17:46	Lob	exit	K	1
2016-08-23	12	1	16:44:10	07:27:10	00:23:34	Lob	F_attempt	E	301
2016-08-23	12	1	16:49:20	07:32:20	00:28:44	Lob	S_attempt	E	227
2016-08-23	12	1	16:53:11	07:36:11	00:32:35	Lob	feeding		122
2016-08-23	12	1	17:10:54	07:53:54	00:14:55	Lob	F_attempt	E	173
2016-08-23	12	1	17:16:24	07:59:24	00:20:25	Lob	F_attempt	E	22
2016-08-23	12	1	17:22:09	08:05:09	00:26:10	Lob	F_attempt	E	10
2016-08-23	12	1	17:28:15	08:11:15	00:32:16	Lob	F_attempt	E	28
2016-08-23	12	1	17:33:57	08:16:57	00:02:35	Lob	S_attempt	E	47
2016-08-23	12	1	17:38:02	08:21:02	00:06:40	Lob	feeding		95
2016-08-23	12	1	17:40:53	08:23:53	00:09:31	Lob	feeding		197
2016-08-23	12	1	17:44:58	08:27:58	00:13:36	Lob	feeding		105
2016-08-23	12	1	17:49:31	08:32:31	00:18:09	Lob	feeding		38
2016-08-23	12	1	17:50:24	08:33:24	00:19:02	Lob	F_attempt	E	9
2016-08-23	12	1	17:51:19	08:34:19	00:19:57	Lob	feeding		112
2016-08-23	12	1	17:53:21	08:36:21	00:21:59	Lob	feeding		242
2016-08-23	12	1	17:58:10	08:41:10	00:26:48	Lob	feeding		71
2016-08-23	12	1	18:11:04	08:54:04	00:04:19	Lob	S_attempt	T	6
2016-08-23	12	1	18:11:58	08:54:58	00:05:13	Lob	exit	B	1
2016-08-23	12	1	18:12:29	08:55:29	00:05:44	Lob	S_attempt	B	4
2016-08-23	12	1	18:13:09	08:56:09	00:06:24	Lob	feeding		66
2016-08-23	12	1	18:14:15	08:57:15	00:07:30	Lob	F_attempt	E	74
2016-08-23	12	1	18:14:17	08:57:17	00:07:32	Lob	exit	B	1
2016-08-23	12	1	18:37:32	09:20:32	00:30:47	Lob	S_attempt	T	2
2016-08-23	12	1	18:38:03	09:21:03	00:31:18	Lob	exit	T	2
2016-08-23	12	1	18:42:09	09:25:09	00:00:01	Lob	aggression
2016-08-23	12	1	18:49:38	09:32:38	00:07:30	Lob	F_attempt	E	8
2016-08-23	12	1	18:55:07	09:38:07	00:12:59	Lob	F_attempt	E	91
2016-08-23	12	1	19:34:06	10:17:06	00:16:35	Lob	F_attempt	E	20
2016-08-23	12	1	19:50:50	10:33:50	00:33:19	Lob	S_attempt	T	5
2016-08-23	12	1	19:51:00	10:34:00	00:33:29	Lob	exit	T	2
2016-08-23	12	1	20:07:03	10:50:03	00:14:09	Lob	F_attempt	E	47
2016-08-23	12	1	20:11:13	10:54:13	00:18:19	Lob	F_attempt	E	103
2016-08-23	12	1	20:15:54	10:58:54	00:23:00		end			5
2016-08-24	13	1	09:30:00	00:00:00	00:01:00		start
2016-08-24	13	1	09:32:37	00:02:37	00:03:37	Lob	F_attempt	E	122
2016-08-24	13	1	09:33:15	00:03:15	00:04:15	GC	feeding		945
2016-08-24	13	1	09:36:00	00:06:00	00:07:00	Lob	F_attempt	E	27
2016-08-24	13	1	09:37:44	00:07:44	00:08:44	Lob	F_attempt	E	75
2016-08-24	13	1	09:39:05	00:09:05	00:10:05	Lob	F_attempt	E	46
2016-08-24	13	1	09:44:21	00:14:21	00:15:21	Lob	S_attempt	T	5
2016-08-24	13	1	09:44:34	00:14:34	00:15:34	Lob	exit	K	1
2016-08-24	13	1	09:44:36	00:14:36	00:15:36	Lob	F_attempt	E	28
2016-08-24	13	1	09:46:29	00:16:29	00:17:29	Lob	S_attempt	T	2
2016-08-24	13	1	09:49:27	00:19:27	00:20:27	GC	feeding		62
2016-08-24	13	1	09:49:38	00:19:38	00:20:38	Lob	exit	T	1
2016-08-24	13	1	09:50:09	00:20:09	00:21:09	Lob	S_attempt	T	1
2016-08-24	13	1	09:51:30	00:21:30	00:22:30	Lob	exit	T	1
2016-08-24	13	1	09:53:55	00:23:55	00:24:55	GC	feeding		500
2016-08-24	13	1	09:54:04	00:24:04	00:25:04	Lob	S_attempt	B	5
2016-08-24	13	1	09:55:10	00:25:10	00:26:10	Lob	exit	T	1
2016-08-24	13	1	09:59:56	00:29:56	00:30:56	Lob	S_attempt	T	6
2016-08-24	13	1	10:00:12	00:30:12	00:31:12	Lob	S_attempt	T	16
2016-08-24	13	1	10:00:45	00:30:45	00:31:45	Lob	exit	B	1
2016-08-24	13	1	10:00:49	00:30:49	00:31:49	Lob	S_attempt	T	4
2016-08-24	13	1	10:01:27	00:31:27	00:32:27	Lob	exit	T	2
2016-08-24	13	1	10:02:48	00:32:48	00:33:48	Lob	S_attempt	T	2
2016-08-24	13	1	10:03:01	00:33:01	00:34:01	Lob	exit	T	2
2016-08-24	13	1	10:03:50	00:33:50	00:34:50	Lob	exit	P	1
2016-08-24	13	1	10:05:36	00:35:36	00:01:13	Lob	S_attempt	T	3
2016-08-24	13	1	10:08:25	00:38:25	00:04:02	Lob	exit	B	1
2016-08-24	13	1	10:09:10	00:39:10	00:04:47	Lob	S_attempt	T	1
2016-08-24	13	1	10:09:29	00:39:29	00:05:06	Lob	F_attempt	E	31
2016-08-24	13	1	10:10:17	00:40:17	00:05:54	Lob	exit	T	1
2016-08-24	13	1	10:11:06	00:41:06	00:06:43	Lob	F_attempt	E	48
2016-08-24	13	1	10:15:49	00:45:49	00:11:26	Lob	F_attempt	E	39
2016-08-24	13	1	10:17:07	00:47:07	00:12:44	Lob	F_attempt	E	25
2016-08-24	13	1	10:18:03	00:48:03	00:13:40	Lob	S_attempt	B	6
2016-08-24	13	1	10:19:14	00:49:14	00:14:51	Lob	F_attempt	E	3
2016-08-24	13	1	10:19:45	00:49:45	00:15:22	GC	feeding		789
2016-08-24	13	1	10:20:29	00:50:29	00:16:06	Lob	exit	P	1
2016-08-24	13	1	10:20:31	00:50:31	00:16:08	Lob	S_attempt	B	8
2016-08-24	13	1	10:20:57	00:50:57	00:16:34	Lob	exit	E	1
2016-08-24	13	1	10:20:58	00:50:58	00:16:35	Lob	F_attempt	E	33
2016-08-24	13	1	10:21:59	00:51:59	00:17:36	Lob	F_attempt	E	68
2016-08-24	13	1	10:23:24	00:53:24	00:19:01	Lob	F_attempt	E	7
2016-08-24	13	1	10:24:30	00:54:30	00:20:07	Lob	S_attempt	E	12
2016-08-24	13	1	10:24:45	00:54:45	00:20:22	Lob	S_attempt	E	14
2016-08-24	13	1	10:25:29	00:55:29	00:21:06	Lob	exit	T	1
2016-08-24	13	1	10:26:16	00:56:16	00:21:53	Lob	F_attempt	E	18
2016-08-24	13	1	10:29:08	00:59:08	00:24:45	Lob	exit	B	1
2016-08-24	13	1	10:29:18	00:59:18	00:24:55	Lob	F_attempt	E	18
2016-08-24	13	1	10:29:23	00:59:23	00:25:00	Lob	S_attempt	B	5
2016-08-24	13	1	10:29:49	00:59:49	00:25:26	Lob	exit	B	4
2016-08-24	13	1	10:30:33	01:00:33	00:26:10	Lob	F_attempt	E	567
2016-08-24	13	1	10:32:55	01:02:55	00:28:32	Lob	feeding		207
2016-08-24	13	1	10:41:40	01:11:40	00:01:54	Lob	F_attempt	E	36
2016-08-24	13	1	10:42:48	01:12:48	00:03:02	Lob	F_attempt	E	11
2016-08-24	13	1	10:44:26	01:14:26	00:04:40	GC	feeding		8
2016-08-24	13	1	10:44:33	01:14:33	00:04:47	Lob	F_attempt	E	31
2016-08-24	13	1	10:44:38	01:14:38	00:04:52	Lob	S_attempt	T	6
2016-08-24	13	1	10:44:51	01:14:51	00:05:05	Lob	exit	T	1
2016-08-24	13	1	10:45:35	01:15:35	00:05:49	Lob	F_attempt	E	47
2016-08-24	13	1	10:48:26	01:18:26	00:08:40	Lob	F_attempt	E	32
2016-08-24	13	1	10:49:37	01:19:37	00:09:51	GC	feeding		36
2016-08-24	13	1	10:50:26	01:20:26	00:10:40	Lob	F_attempt	E	35
2016-08-24	13	1	10:50:36	01:20:36	00:10:50	Lob	S_attempt	B	4
2016-08-24	13	1	10:51:07	01:21:07	00:11:21	Lob	F_attempt	E	38
2016-08-24	13	1	10:53:14	01:23:14	00:13:28	Lob	S_attempt	T	5
2016-08-24	13	1	10:53:40	01:23:40	00:13:54	Lob	exit	T	1
2016-08-24	13	1	10:59:35	01:29:35	00:19:49	Lob	F_attempt	E	84
2016-08-24	13	1	11:00:09	01:30:09	00:20:23	GC	feeding		167
2016-08-24	13	1	11:01:26	01:31:26	00:21:40	Lob	F_attempt	E	49
2016-08-24	13	1	11:08:30	01:38:30	00:28:44	DIVE	DIVE
2016-08-24	13	1	11:17:37	01:47:37	00:02:28	Lob	F_attempt	T	12
2016-08-24	13	1	11:26:42	01:56:42	00:11:33	Lob	F_attempt	E	12
2016-08-24	13	1	11:28:39	01:58:39	00:13:30	DIVE	DIVE
2016-08-24	13	1	11:28:49	01:58:49	00:13:40	Lob	F_attempt	E	14
2016-08-24	13	1	11:30:28	02:00:28	00:15:19	Lob	exit	B	6
2016-08-24	13	1	11:43:23	02:13:23	00:28:14	Lob	F_attempt	T	25
2016-08-24	13	1	11:44:12	02:14:12	00:29:03	Lob	S_attempt	T	3
2016-08-24	13	1	11:45:41	02:15:41	00:30:32	Lob	exit	T	4
2016-08-24	13	1	11:48:52	02:18:52	00:33:43	GC	feeding		157
2016-08-24	13	1	11:52:33	02:22:33	00:02:01	Lob	F_attempt	E	64
2016-08-24	13	1	11:57:22	02:27:22	00:06:50	Lob	S_attempt	B	9
2016-08-24	13	1	11:57:29	02:27:29	00:06:57	Lob	F_attempt	E	61
2016-08-24	13	1	11:58:11	02:28:11	00:07:39	Lob	exit	B	1
2016-08-24	13	1	11:58:47	02:28:47	00:08:15	Lob	F_attempt	E	78
2016-08-24	13	1	12:00:34	02:30:34	00:10:02	Lob	F_attempt	E	144
2016-08-24	13	1	12:04:41	02:34:41	00:14:09	Lob	F_attempt	E	29
2016-08-24	13	1	12:15:54	02:45:54	00:25:22	Lob	S_attempt	B	10
2016-08-24	13	1	12:16:32	02:46:32	00:26:00	Lob	exit	B	1
2016-08-24	13	1	12:18:01	02:48:01	00:27:29	GC	feeding		47
2016-08-24	13	1	12:18:47	02:48:47	00:28:15	Lob	F_attempt	E	19
2016-08-24	13	1	12:18:58	02:48:58	00:28:26	GC-Lob	aggression		7
2016-08-24	13	1	12:25:35	02:55:35	00:35:03	Lob	F_attempt	E	15
2016-08-24	13	1	12:27:51	02:57:51	00:01:56	GC	feeding		142
2016-08-24	13	1	12:33:26	03:03:26	00:07:31	GC	feeding		780
2016-08-24	13	1	12:37:42	03:07:42	00:11:47	Lob	F_attempt	E	35
2016-08-24	13	1	12:44:19	03:14:19	00:18:24	Lob	S_attempt	B	3
2016-08-24	13	1	12:45:04	03:15:04	00:19:09	Lob	exit	T	1
2016-08-24	13	1	12:45:35	03:15:35	00:19:40	Lob	S_attempt	T	4
2016-08-24	13	1	12:46:47	03:16:47	00:20:52	Lob	exit	B	1
2016-08-24	13	1	12:55:36	03:25:36	00:29:41	Lob	F_attempt	E	32
2016-08-24	13	1	12:56:04	03:26:04	00:30:09	GC	feeding		107
2016-08-24	13	1	12:58:06	03:28:06	00:32:11	Lob	F_attempt	E	33
2016-08-24	13	1	12:58:47	03:28:47	00:32:52	Lob	F_attempt	E	32
2016-08-24	13	1	13:07:49	03:37:49	00:06:31	Lob	S_attempt	E	62
2016-08-24	13	1	13:10:18	03:40:18	00:09:00	Lob	F_attempt	E	53
2016-08-24	13	1	13:12:28	03:42:28	00:11:10	Lob	F_attempt	E	40
2016-08-24	13	1	13:18:48	03:48:48	00:17:30	Lob	S_attempt	B	4
2016-08-24	13	1	13:19:58	03:49:58	00:18:40	Lob	F_attempt	E	2
2016-08-24	13	1	13:20:31	03:50:31	00:19:13	Lob	exit	T	2
2016-08-24	13	1	13:26:50	03:56:50	00:25:32	Lob	S_attempt	T	2
2016-08-24	13	1	13:30:03	04:00:03	00:28:45	Lob	exit	T	1
2016-08-24	13	1	13:38:19	04:08:19	00:01:38	Lob	F_attempt	E	23
2016-08-24	13	1	13:40:36	04:10:36	00:03:55	Lob	F_attempt	E	3
2016-08-24	13	1	13:58:08	04:28:08	00:21:27	Lob	F_attempt	E	34
2016-08-24	13	1	13:58:52	04:28:52	00:22:11	Lob	S_attempt	B	3
2016-08-24	13	1	13:58:53	04:28:53	00:22:12	GC	feeding		18
2016-08-24	13	1	13:59:33	04:29:33	00:22:52	Lob	exit	T	1
2016-08-24	13	1	14:04:35	04:34:35	00:27:54	Lob	S_attempt	B	4
2016-08-24	13	1	14:04:38	04:34:38	00:27:57	Lob	F_attempt	E	19
2016-08-24	13	1	14:04:58	04:34:58	00:28:17	Lob	exit	T	1
2016-08-24	13	1	14:10:31	04:40:31	00:33:50	GC	feeding		150
2016-08-24	13	1	14:13:01	04:43:01	00:00:57	Lob	F_attempt	E	14
2016-08-24	13	1	14:14:59	04:44:59	00:02:55	Lob	F_attempt	E	7
2016-08-24	13	1	14:15:49	04:45:49	00:03:45	GC	feeding		38
2016-08-24	13	1	14:16:00	04:46:00	00:03:56	Lob	F_attempt	E	16
2016-08-24	13	1	14:20:05	04:50:05	00:08:01	Lob	F_attempt	E	46
2016-08-24	13	1	14:21:49	04:51:49	00:09:45	Lob	F_attempt	E	94
2016-08-24	13	1	14:23:39	04:53:39	00:11:35	Lob	F_attempt	E	5
2016-08-24	13	1	14:25:10	04:55:10	00:13:06	GC	feeding		726
2016-08-24	13	1	14:25:35	04:55:35	00:13:31	Lob	F_attempt	E	78
2016-08-24	13	1	14:35:29	05:05:29	00:23:25	Lob	F_attempt	E	11
2016-08-24	13	1	14:36:00	05:06:00	00:23:56	Lob	F_attempt	E	103
2016-08-24	13	1	14:40:40	05:10:40	00:28:36	Lob	F_attempt	E	25
2016-08-24	13	1	14:42:13	05:12:13	00:30:09	GC	feeding		192
2016-08-24	13	1	14:42:35	05:12:35	00:30:31	Lob	F_attempt	E	13
2016-08-24	13	1	14:43:48	05:13:48	00:31:44	Lob	S_attempt	E	257
2016-08-24	13	1	14:47:15	05:17:15	00:35:11	GC	feeding		75
2016-08-24	13	1	14:50:12	05:20:12	00:02:45	Lob	feeding		82
2016-08-24	13	1	14:53:54	05:23:54	00:06:27	Lob	feeding		38
2016-08-24	13	1	15:04:13	05:34:13	00:16:46	Lob	F_attempt	E	49
2016-08-24	13	1	15:04:40	05:34:40	00:17:13	GC	feeding		449
2016-08-24	13	1	15:05:58	05:35:58	00:18:31	Lob	F_attempt	E	85
2016-08-24	13	1	15:12:41	05:42:41	00:25:14	GC	feeding		687
2016-08-24	13	1	15:22:14	05:52:14	00:34:47	Lob	F_attempt	E	192
2016-08-24	13	1	15:26:51	05:56:51	00:04:01	Lob	F_attempt	E	432
2016-08-24	13	1	15:36:33	06:06:33	00:13:43	Lob	F_attempt	E	102
2016-08-24	13	1	15:38:35	06:08:35	00:15:45	Lob	F_attempt	E	62
2016-08-24	13	1	15:40:55	06:10:55	00:18:05	Lob	F_attempt	E	95
2016-08-24	13	1	15:42:51	06:12:51	00:20:01	Lob	F_attempt	E	17
2016-08-24	13	1	15:43:50	06:13:50	00:21:00	Lob	F_attempt	E	166
2016-08-24	13	1	15:46:54	06:16:54	00:24:04	Lob	F_attempt	E	78
2016-08-24	13	1	15:49:17	06:19:17	00:26:27	Lob	F_attempt	E	22
2016-08-24	13	1	15:49:42	06:19:42	00:26:52	Lob	F_attempt	E	164
2016-08-24	13	1	15:52:57	06:22:57	00:30:07	Lob	F_attempt	E	195
2016-08-24	13	1	15:56:09	06:26:09	00:33:19	Lob	F_attempt	B	45
2016-08-24	13	1	15:57:00	06:27:00	00:34:10	Lob	S_attempt	B	11
2016-08-24	13	1	15:57:14	06:27:14	00:34:24	Lob	exit	B	2
2016-08-24	13	1	15:57:41	06:27:41	00:34:51	Lob	F_attempt	E	56
2016-08-24	13	1	16:03:26	06:33:26	00:05:13	Lob	S_attempt	B	4
2016-08-24	13	1	16:03:37	06:33:37	00:05:24	Lob	exit	B	1
2016-08-24	13	1	16:07:37	06:37:37	00:09:24	Lob	F_attempt	E	26
2016-08-24	13	1	16:08:46	06:38:46	00:10:33	Lob	S_attempt	B	10
2016-08-24	13	1	16:10:20	06:40:20	00:12:07	Lob	F_attempt	E	69
2016-08-24	13	1	16:10:53	06:40:53	00:12:40	Lob	exit	B	1
2016-08-24	13	1	16:14:08	06:44:08	00:15:55	Lob	F_attempt	E	35
2016-08-24	13	1	16:16:01	06:46:01	00:17:48	Lob	S_attempt	B	6
2016-08-24	13	1	16:17:50	06:47:50	00:19:37	GC	feeding		624
2016-08-24	13	1	16:18:09	06:48:09	00:19:56	Lob	feeding		9
2016-08-24	13	1	16:22:33	06:52:33	00:24:20	Lob	F_attempt	E	9
2016-08-24	13	1	16:24:21	06:54:21	00:26:08	Lob	exit	T	1
2016-08-24	13	1	16:27:34	06:57:34	00:29:21	Lob	F_attempt	E	108
2016-08-24	13	1	16:29:35	06:59:35	00:31:22	Lob	F_attempt	E	286
2016-08-24	13	1	16:30:20	07:00:20	00:32:07	Lob	S_attempt	T	4
2016-08-24	13	1	16:45:47	07:15:47	00:12:11	Lob	S_attempt	B	1
2016-08-24	13	1	16:36:53	07:06:53	00:03:17	Lob	S_attempt	B	9
2016-08-24	13	1	16:38:14	07:08:14	00:04:38	Lob	exit	T	3
2016-08-24	13	1	16:41:26	07:11:26	00:07:50	Lob	F_attempt	E	13
2016-08-24	13	1	16:44:52	07:14:52	00:11:16	Lob	exit	B	1
2016-08-24	13	1	16:48:10	07:18:10	00:14:34	Lob	S_attempt	T	2
2016-08-24	13	1	16:48:38	07:18:38	00:15:02	Lob	exit	B	1
2016-08-24	13	1	16:52:04	07:22:04	00:18:28	GC	feeding		174
2016-08-24	13	1	17:04:44	07:34:44	00:31:08	Lob	F_attempt	E	113
2016-08-24	13	1	17:09:46	07:39:46	00:00:47	GC	feeding		1772
2016-08-24	13	1	17:14:22	07:44:22	00:05:23	Lob	F_attempt	E	20
2016-08-24	13	1	17:15:59	07:45:59	00:07:00	Lob	S_attempt	B	6
2016-08-24	13	1	17:17:30	07:47:30	00:08:31	Lob	exit	B	1
2016-08-24	13	1	17:18:44	07:48:44	00:09:45	Lob	F_attempt	B	18
2016-08-24	13	1	17:26:38	07:56:38	00:17:39	Lob	F_attempt	E	121
2016-08-24	13	1	17:34:40	08:04:40	00:25:41	Lob	F_attempt	E	9
2016-08-24	13	1	17:39:26	08:09:26	00:30:27	Lob	S_attempt	B	7
2016-08-24	13	1	17:40:35	08:10:35	00:31:36	Lob	exit	B	1
2016-08-24	13	1	17:42:17	08:12:17	00:33:18	Lob	S_attempt	B	6
2016-08-24	13	1	17:43:47	08:13:47	00:34:48	Lob	exit	B	1
2016-08-24	13	1	17:45:18	08:15:18	00:00:56	GC	feeding		346
2016-08-24	13	1	17:46:26	08:16:26	00:02:04	Lob	S_attempt	B	6
2016-08-24	13	1	17:46:42	08:16:42	00:02:20	Lob	exit	B	1
2016-08-24	13	1	17:47:09	08:17:09	00:02:47	Lob	S_attempt	B	5
2016-08-24	13	1	17:47:31	08:17:31	00:03:09	Lob	exit	B	2
2016-08-24	13	1	17:54:22	08:24:22	00:10:00	Lob	S_attempt	T	2
2016-08-24	13	1	17:56:05	08:26:05	00:11:43	Lob	S_attempt	B	5
2016-08-24	13	1	17:56:09	08:26:09	00:11:47	Lob	exit	P	1
2016-08-24	13	1	17:57:26	08:27:26	00:13:04	GC	feeding		338
2016-08-24	13	1	17:59:47	08:29:47	00:15:25	Lob	exit	E	7
2016-08-24	13	1	18:00:08	08:30:08	00:15:46	Lob	exit	B	65
2016-08-24	13	1	18:01:48	08:31:48	00:17:26	Lob	S_attempt	B	2
2016-08-24	13	1	18:03:57	08:33:57	00:19:35	GC	feeding		276
2016-08-24	13	1	18:08:33	08:38:33	00:24:11	Lob	exit	B	3
2016-08-24	13	1	18:09:11	08:39:11	00:24:49	Lob	S_attempt	B	3
2016-08-24	13	1	18:16:27	08:46:27	00:32:05	Lob	exit	B	1
2016-08-24	13	1	18:25:03	08:55:03	00:05:18	Lob	F_attempt	E	19
2016-08-24	13	1	18:28:22	08:58:22	00:08:37	Lob	F_attempt	T	10
2016-08-24	13	1	18:30:02	09:00:02	00:10:17	Lob	S_attempt	B	2
2016-08-24	13	1	18:31:33	09:01:33	00:11:48	Lob	F_attempt	E	137
2016-08-24	13	1	18:32:59	09:02:59	00:13:14	Lob	exit	B	4
2016-08-24	13	1	18:34:31	09:04:31	00:14:46	GC	feeding		661
2016-08-24	13	1	18:44:55	09:14:55	00:25:10	Lob	S_attempt	B	2
2016-08-24	13	1	18:47:25	09:17:25	00:27:40	Lob	exit	B	3
2016-08-24	13	1	19:03:49	09:33:49	00:08:41	Lob	S_attempt	B	13
2016-08-24	13	1	19:04:13	09:34:13	00:09:05	Lob	exit	K	1
2016-08-24	13	1	19:07:13	09:37:13	00:12:05	Lob	F_attempt	E	4
2016-08-24	13	1	19:11:22	09:41:22	00:16:14	Lob	S_attempt	T	9
2016-08-24	13	1	19:12:13	09:42:13	00:17:05	GC	feeding		55
2016-08-24	13	1	19:13:19	09:43:19	00:18:11	Lob	F_attempt	E	60
2016-08-24	13	1	19:23:29	09:53:29	00:28:21	Lob	F_attempt	E	24
2016-08-24	13	1	19:28:24	09:58:24	00:33:16	Lob	S_attempt	B	10
2016-08-24	13	1	19:28:30	09:58:30	00:33:22	Lob	F_attempt	E	16
2016-08-24	13	1	19:28:56	09:58:56	00:33:48	Lob	F_attempt	E	6
2016-08-24	13	1	19:29:05	09:59:05	00:33:57	Lob	exit	B	1
2016-08-24	13	1	19:39:09	10:09:09	00:08:38	Lob	F_attempt	E	98
2016-08-24	13	1	20:00:23	10:30:23	00:29:52	Lob	S_attempt	B	4
2016-08-24	13	1	20:00:38	10:30:38	00:30:07	Lob	exit	B	1
2016-08-24	13	1	20:05:54	10:35:54	00:35:23		end			2
2016-08-25	14	1	08:56:00	00:00:00	00:01:00		start
2016-08-25	14	1	08:58:55	00:02:55	00:03:55	Lob	S_attempt	T	4
2016-08-25	14	1	08:59:45	00:03:45	00:04:45	Lob	exit	T	2
2016-08-25	14	1	08:59:46	00:03:46	00:04:46	GC	feeding		103
2016-08-25	14	1	09:06:25	00:10:25	00:11:25	Lob	S_attempt	B	5
2016-08-25	14	1	09:06:38	00:10:38	00:11:38	Lob	exit	B	1
2016-08-25	14	1	09:06:49	00:10:49	00:11:49	Lob	S_attempt	T	4
2016-08-25	14	1	09:07:03	00:11:03	00:12:03	Lob	exit	T	1
2016-08-25	14	1	09:07:29	00:11:29	00:12:29	GC	feeding		125
2016-08-25	14	1	09:07:04	00:11:04	00:12:04	Lob	S_attempt	B	4
2016-08-25	14	1	09:07:19	00:11:19	00:12:19	Lob	S_attempt	T	5
2016-08-25	14	1	09:08:27	00:12:27	00:13:27	Lob	S_attempt	P	7
2016-08-25	14	1	09:08:53	00:12:53	00:13:53	Lob	exit	T	4
2016-08-25	14	1	09:11:45	00:15:45	00:16:45	Lob	exit	T	1
2016-08-25	14	1	09:12:01	00:16:01	00:17:01	Lob	exit	P	1
2016-08-25	14	1	09:18:25	00:22:25	00:23:25	Lob	S_attempt	T	10
2016-08-25	14	1	09:19:46	00:23:46	00:24:46	Lob	exit	P	5
2016-08-25	14	1	09:31:05	00:35:05	00:00:42	Lob	S_attempt	T	2
2016-08-25	14	1	09:34:14	00:38:14	00:03:51	Lob	exit	T	1
2016-08-25	14	1	09:39:09	00:43:09	00:08:46	Lob	F_attempt	E	5
2016-08-25	14	1	09:39:23	00:43:23	00:09:00	Lob	S_attempt	T	5
2016-08-25	14	1	09:40:06	00:44:06	00:09:43	Lob	exit	T	1
2016-08-25	14	1	09:45:33	00:49:33	00:15:10	GC	feeding		719
2016-08-25	14	1	09:51:07	00:55:07	00:20:44	Lob	S_attempt	B	7
2016-08-25	14	1	09:52:53	00:56:53	00:22:30	Lob	exit	T	1
2016-08-25	14	1	09:53:10	00:57:10	00:22:47	Lob	S_attempt	T	14
2016-08-25	14	1	09:56:02	01:00:02	00:25:39	Lob	S_attempt	B	9
2016-08-25	14	1	09:56:40	01:00:40	00:26:17	Lob	exit	B	1
2016-08-25	14	1	09:56:49	01:00:49	00:26:26	Lob	S_attempt	B	7
2016-08-25	14	1	09:57:44	01:01:44	00:27:21	Lob	exit	B	1
2016-08-25	14	1	09:58:03	01:02:03	00:27:40	Lob	S_attempt	E	47
2016-08-25	14	1	09:58:10	01:02:10	00:27:47	GC-Lob	aggression		8
2016-08-25	14	1	09:58:56	01:02:56	00:28:33	Lob	feeding		55
2016-08-25	14	1	09:59:00	01:03:00	00:28:37	Lob	exit	T	1
2016-08-25	14	1	09:59:44	01:03:44	00:29:21	Lob	F_attempt	E	8
2016-08-25	14	1	09:59:50	01:03:50	00:29:27	GC-Lob	aggression		4
2016-08-25	14	1	10:00:10	01:04:10	00:29:47	Lob	feeding		261
2016-08-25	14	1	10:03:16	01:07:16	00:32:53	Lob	F_attempt	T	14
2016-08-25	14	1	10:04:47	01:08:47	00:34:24	GC-Lob	aggression		10
2016-08-25	14	1	10:04:58	01:08:58	00:34:35	Lob	feeding		1382
2016-08-25	14	1	10:07:15	01:11:15	00:01:29	Lob	S_attempt	B	4
2016-08-25	14	1	10:08:13	01:12:13	00:02:27	Lob	S_attempt	B	27
2016-08-25	14	1	10:08:53	01:12:53	00:03:07	GC-Lob	aggression		46
2016-08-25	14	1	10:09:42	01:13:42	00:03:56	Lob	exit	B	1
2016-08-25	14	1	10:11:48	01:15:48	00:06:02	Lob	exit	T	1
2016-08-25	14	1	10:18:19	01:22:19	00:12:33	Lob	S_attempt	B	11
2016-08-25	14	1	10:20:15	01:24:15	00:14:29	Lob	exit	B	1
2016-08-25	14	1	10:24:25	01:28:25	00:18:39	Lob	S_attempt	T	4
2016-08-25	14	1	10:27:48	01:31:48	00:22:02	Lob	exit	B	1
2016-08-25	14	1	10:32:07	01:36:07	00:26:21	Lob	F_attempt	E	21
2016-08-25	14	1	10:33:36	01:37:36	00:27:50	Lob	F_attempt	E	12
2016-08-25	14	1	10:34:12	01:38:12	00:28:26	Lob	S_attempt	B	3
2016-08-25	14	1	10:35:17	01:39:17	00:29:31	Lob	exit	B	7
2016-08-25	14	1	10:43:35	01:47:35	00:02:26	DIVE	DIVE
2016-08-25	14	1	10:49:37	01:53:37	00:08:28	Lob	S_attempt	B	7
2016-08-25	14	1	10:49:59	01:53:59	00:08:50	Lob	exit	T	1
2016-08-25	14	1	10:50:18	01:54:18	00:09:09	Lob	S_attempt	T	1
2016-08-25	14	1	10:51:24	01:55:24	00:10:15	Lob	exit	T	1
2016-08-25	14	1	10:52:23	01:56:23	00:11:14	Lob	S_attempt	T	5
2016-08-25	14	1	10:52:57	01:56:57	00:11:48	Lob	exit	P	1
2016-08-25	14	1	11:01:27	02:05:27	00:20:18	DIVE	DIVE
2016-08-25	14	1	11:02:05	02:06:05	00:20:56	Lob	S_attempt	T	2
2016-08-25	14	1	11:02:35	02:06:35	00:21:26	Lob	exit	B	1
2016-08-25	14	1	11:06:55	02:10:55	00:25:46	Lob	F_attempt	E	236
2016-08-25	14	1	11:19:39	02:23:39	00:03:07	Lob	F_attempt	E	48
2016-08-25	14	1	11:28:21	02:32:21	00:11:49	Lob	S_attempt	T	7
2016-08-25	14	1	11:28:29	02:32:29	00:11:57	Lob	exit	T	1
2016-08-25	14	1	11:29:03	02:33:03	00:12:31	Lob	F_attempt	E	19
2016-08-25	14	1	11:31:35	02:35:35	00:15:03	Lob	F_attempt	E	3
2016-08-25	14	1	11:34:15	02:38:15	00:17:43	Lob	F_attempt	E	5
2016-08-25	14	1	11:35:43	02:39:43	00:19:11	Lob	S_attempt	B	10
2016-08-25	14	1	11:35:55	02:39:55	00:19:23	Lob	exit	B	1
2016-08-25	14	1	11:43:11	02:47:11	00:26:39	Lob	F_attempt	B	21
2016-08-25	14	1	12:00:24	03:04:24	00:08:29	Lob	F_attempt	E	43
2016-08-25	14	1	12:17:55	03:21:55	00:26:00	Lob	S_attempt	B	2
2016-08-25	14	1	12:19:31	03:23:31	00:27:36	Lob	exit	T	1
2016-08-25	14	1	12:22:51	03:26:51	00:30:56	Lob	S_attempt	B	1
2016-08-25	14	1	12:23:44	03:27:44	00:31:49	Lob	S_attempt	B	1
2016-08-25	14	1	12:24:05	03:28:05	00:32:10	Lob	exit	B	1
2016-08-25	14	1	12:24:40	03:28:40	00:32:45	Lob	exit	B	1
2016-08-25	14	1	12:25:04	03:29:04	00:33:09	Lob	S_attempt	B	1
2016-08-25	14	1	12:25:19	03:29:19	00:33:24	Lob	exit	B	1
2016-08-25	14	1	12:26:24	03:30:24	00:34:29	Lob	F_attempt	E	47
2016-08-25	14	1	12:31:23	03:35:23	00:04:05	Lob	S_attempt	E	54
2016-08-25	14	1	12:35:57	03:39:57	00:08:39	Lob	S_attempt	T	13
2016-08-25	14	1	12:38:12	03:42:12	00:10:54	Lob	exit	B	1
2016-08-25	14	1	12:39:56	03:43:56	00:12:38	Lob	exit	B	4
2016-08-25	14	1	12:40:04	03:44:04	00:12:46	Lob	F_attempt	E	20
2016-08-25	14	1	12:40:53	03:44:53	00:13:35	Lob	F_attempt	E	123
2016-08-25	14	1	12:43:29	03:47:29	00:16:11	Lob	S_attempt	B	4
2016-08-25	14	1	12:44:20	03:48:20	00:17:02	Lob	exit	B	1
2016-08-25	14	1	12:48:52	03:52:52	00:21:34	Lob	S_attempt	B	6
2016-08-25	14	1	12:48:58	03:52:58	00:21:40	Lob	F_attempt	E	35
2016-08-25	14	1	12:49:08	03:53:08	00:21:50	Lob	exit	B	5
2016-08-25	14	1	12:49:22	03:53:22	00:22:04	Lob	S_attempt	B	6
2016-08-25	14	1	12:50:16	03:54:16	00:22:58	Lob	exit	B	1
2016-08-25	14	1	12:50:44	03:54:44	00:23:26	Lob	S_attempt	B	4
2016-08-25	14	1	12:50:52	03:54:52	00:23:34	Lob	exit	B	3
2016-08-25	14	1	13:11:42	04:15:42	00:09:01	Lob	F_attempt	B	16
2016-08-25	14	1	13:23:40	04:27:40	00:20:59	Lob	F_attempt	E	32
2016-08-25	14	1	13:31:07	04:35:07	00:28:26	Lob	F_attempt	E	67
2016-08-25	14	1	13:40:04	04:44:04	00:02:00	Lob	S_attempt	E	21
2016-08-25	14	1	13:42:17	04:46:17	00:04:13	Lob	aggression		246
2016-08-25	14	1	13:49:51	04:53:51	00:11:47	Lob	aggression		7
2016-08-25	14	1	13:49:58	04:53:58	00:11:54	Lob	exit	B	1
2016-08-25	14	1	13:51:31	04:55:31	00:13:27	Lob	F_attempt	E	134
2016-08-25	14	1	13:54:46	04:58:46	00:16:42	Lob	F_attempt	E	6
2016-08-25	14	1	13:56:24	05:00:24	00:18:20	Lob	F_attempt	E	27
2016-08-25	14	1	13:59:44	05:03:44	00:21:40	Lob	S_attempt	B	2
2016-08-25	14	1	13:59:48	05:03:48	00:21:44	Lob	exit	B	1
2016-08-25	14	1	14:02:28	05:06:28	00:24:24	Lob	S_attempt	E	30
2016-08-25	14	1	14:02:35	05:06:35	00:24:31	Lob	S_attempt	B	6
2016-08-25	14	1	14:02:48	05:06:48	00:24:44	Lob	exit	B	1
2016-08-25	14	1	14:03:12	05:07:12	00:25:08	Lob	feeding		127
2016-08-25	14	1	14:03:50	05:07:50	00:25:46	Lob	F_attempt	E	50
2016-08-25	14	1	14:06:35	05:10:35	00:28:31	Lob	feeding		268
2016-08-25	14	1	14:10:48	05:14:48	00:32:44	Lob	S_attempt	T	3
2016-08-25	14	1	14:11:04	05:15:04	00:33:00	Lob	exit	T	1
2016-08-25	14	1	14:12:06	05:16:06	00:34:02	Lob	feeding		1396
2016-08-25	14	1	14:13:48	05:17:48	00:00:21	Lob	F_attempt	T	3
2016-08-25	14	1	14:13:49	05:17:49	00:00:22	Lob	S_attempt	T	5
2016-08-25	14	1	14:13:57	05:17:57	00:00:30	Lob	exit	T	1
2016-08-25	14	1	14:16:41	05:20:41	00:03:14	Lob	S_attempt	T	3
2016-08-25	14	1	14:17:25	05:21:25	00:03:58	Lob	exit	T	1
2016-08-25	14	1	14:22:58	05:26:58	00:09:31	Lob	S_attempt	T	6
2016-08-25	14	1	14:23:24	05:27:24	00:09:57	Lob	exit	T	1
2016-08-25	14	1	14:31:59	05:35:59	00:18:32	Lob	S_attempt	T	2
2016-08-25	14	1	14:32:41	05:36:41	00:19:14	Lob	exit	K	1
2016-08-25	14	1	14:35:18	05:39:18	00:21:51	Lob	F_attempt	E	4
2016-08-25	14	1	14:35:39	05:39:39	00:22:12	Lob	feeding		425
2016-08-25	14	1	14:37:37	05:41:37	00:24:10	Lob	S_attempt	T	2
2016-08-25	14	1	14:38:24	05:42:24	00:24:57	Lob	exit	T	1
2016-08-25	14	1	14:43:00	05:47:00	00:29:33	Lob	feeding		278
2016-08-25	14	1	14:46:49	05:50:49	00:33:22	Lob	F_attempt	B	27
2016-08-25	14	1	14:47:41	05:51:41	00:34:14	GC-Lob	aggression		15
2016-08-25	14	1	14:48:01	05:52:01	00:34:34	Lob	feeding		262
2016-08-25	14	1	15:01:57	05:55:57	00:03:07	Lob	F_attempt	B	16
2016-08-25	14	1	15:02:19	05:56:19	00:03:29	Lob	F_attempt	E	9
2016-08-25	14	1	15:02:45	05:56:45	00:03:55	Lob	feeding		600
2016-08-25	14	1	15:23:36	06:17:36	00:24:46	BAIT DEPL	BAIT DEPL
2016-08-25	14	1	15:28:22	06:22:22	00:29:32	Lob	S_attempt	T	12
2016-08-25	14	1	15:42:52	06:36:52	00:08:39	Lob	exit	B	1
2016-08-25	14	1	15:51:55	06:45:55	00:17:42	Lob	S_attempt	B	15
2016-08-25	14	1	15:52:50	06:46:50	00:18:37	Lob	exit	B	1
2016-08-25	14	1	15:59:49	06:53:49	00:25:36	Lob	S_attempt	B	11
2016-08-25	14	1	16:22:20	07:16:20	00:12:44	Lob	S_attempt	T	19
2016-08-25	14	1	16:22:43	07:16:43	00:13:07	Lob	exit	T	1
2016-08-25	14	1	16:26:25	07:20:25	00:16:49	Lob	feeding		89
2016-08-25	14	1	16:26:55	07:20:55	00:17:19	Lob	S_attempt	B	12
2016-08-25	14	1	16:27:14	07:21:14	00:17:38	Lob	exit	T	1
2016-08-25	14	1	16:27:54	07:21:54	00:18:18	Lob	exit	T	1
2016-08-25	14	1	16:36:05	07:30:05	00:26:29	Lob	S_attempt	B	21
2016-08-25	14	1	16:37:43	07:31:43	00:28:07	Lob	exit	B	1
2016-08-25	14	1	16:39:06	07:33:06	00:29:30	Lob	S_attempt	T	11
2016-08-25	14	1	16:39:50	07:33:50	00:30:14	Lob	exit	P	1
2016-08-25	14	1	16:45:46	07:39:46	00:00:47	Lob	F_attempt	B	58
2016-08-25	14	1	16:46:24	07:40:24	00:01:25	Lob	S_attempt	T	7
2016-08-25	14	1	16:48:02	07:42:02	00:03:03	Lob	S_attempt	B	19
2016-08-25	14	1	16:48:37	07:42:37	00:03:38	Lob	exit	B	9
2016-08-25	14	1	16:49:06	07:43:06	00:04:07	Lob	S_attempt	B	18
2016-08-25	14	1	16:51:01	07:45:01	00:06:02	Lob	exit	B	1
2016-08-25	14	1	16:53:18	07:47:18	00:08:19	Lob	S_attempt	B	9
2016-08-25	14	1	16:54:39	07:48:39	00:09:40	Lob	exit	T	1
2016-08-25	14	1	16:55:11	07:49:11	00:10:12	Lob	S_attempt	T	12
2016-08-25	14	1	16:55:22	07:49:22	00:10:23	Lob	exit	B	1
2016-08-25	14	1	16:55:55	07:49:55	00:10:56	Lob	S_attempt	B	12
2016-08-25	14	1	16:56:54	07:50:54	00:11:55	Lob	exit	B	1
2016-08-25	14	1	16:58:17	07:52:17	00:13:18	Lob	S_attempt	B	5
2016-08-25	14	1	16:58:22	07:52:22	00:13:23	Lob	exit	B	1
2016-08-25	14	1	16:58:58	07:52:58	00:13:59	Lob	exit	B	1
2016-08-25	14	1	17:22:15	08:16:15	00:01:53	Lob	S_attempt	T	15
2016-08-25	14	1	17:23:47	08:17:47	00:03:25	Lob	S_attempt	T	21
2016-08-25	14	1	17:24:17	08:18:17	00:03:55	Lob	exit	T	1
2016-08-25	14	1	17:31:34	08:25:34	00:11:12	Lob	exit	T	1
2016-08-25	14	1	17:57:03	08:51:03	00:01:18	Lob	S_attempt	B	11
2016-08-25	14	1	17:59:29	08:53:29	00:03:44	Lob	F_attempt	E	67
2016-08-25	14	1	18:02:59	08:56:59	00:07:14	Lob	S_attempt	T	7
2016-08-25	14	1	18:03:18	08:57:18	00:07:33	Lob	F_attempt	B	22
2016-08-25	14	1	18:07:30	09:01:30	00:11:45	Lob	exit	B	1
2016-08-25	14	1	18:07:32	09:01:32	00:11:47	Lob	exit	T	4
2016-08-25	14	1	18:18:33	09:12:33	00:22:48	Lob	S_attempt	T	15
2016-08-25	14	1	18:19:26	09:13:26	00:23:41	Lob	F_attempt	B	18
2016-08-25	14	1	18:21:49	09:15:49	00:26:04	Lob	S_attempt	T	6
2016-08-25	14	1	18:30:34	09:24:34	00:34:49	Lob	S_attempt	B	12
2016-08-25	14	1	18:32:12	09:26:12	00:01:04	Lob	F_attempt	B	6
2016-08-25	14	1	18:43:44	09:37:44	00:12:36	Lob	S_attempt	B	6
2016-08-25	14	1	18:44:13	09:38:13	00:13:05	Lob	exit	B	1
2016-08-25	14	1	18:45:36	09:39:36	00:14:28	Lob	S_attempt	B	12
2016-08-25	14	1	18:45:57	09:39:57	00:14:49	Lob	exit	B	3
2016-08-25	14	1	18:46:36	09:40:36	00:15:28	Lob	S_attempt	B	5
2016-08-25	14	1	18:47:35	09:41:35	00:16:27	Lob	exit	B	2
2016-08-25	14	1	18:49:04	09:43:04	00:17:56	Lob	exit	K	2
2016-08-25	14	1	18:54:21	09:48:21	00:23:13	Lob	S_attempt	B	6
2016-08-25	14	1	18:55:39	09:49:39	00:24:31	Lob	exit	B	1
2016-08-25	14	1	19:05:57	09:59:57	00:34:49	Lob	S_attempt	B	15
2016-08-25	14	1	19:07:02	10:01:02	00:00:31	Lob	exit	T	2
2016-08-25	14	1	19:11:11	10:05:11	00:04:40	Lob	F_attempt	E	33
2016-08-25	14	1	19:21:11	10:15:11	00:14:40	Lob	S_attempt	T	33
2016-08-25	14	1	19:22:10	10:16:10	00:15:39	Lob	exit	T	3
2016-08-25	14	1	19:23:04	10:17:04	00:16:33	Lob	S_attempt	B	6
2016-08-25	14	1	19:23:51	10:17:51	00:17:20	Lob	exit	B	21
2016-08-25	14	1	19:24:22	10:18:22	00:17:51	Lob	S_attempt	B	6
2016-08-25	14	1	19:25:30	10:19:30	00:18:59	Lob	exit	B	1
2016-08-25	14	1	19:34:46	10:28:46	00:28:15	Lob	F_attempt	B	21
2016-08-25	14	1	19:37:17	10:31:17	00:30:46	Lob	S_attempt	B	18
2016-08-25	14	1	19:39:21	10:33:21	00:32:50	Lob	exit	T	2
2016-08-25	14	1	19:40:43	10:34:43	00:34:12	Lob	S_attempt	T	42
2016-08-25	14	1	19:41:41	10:35:41	00:35:10	Lob	S_attempt	T	9
2016-08-25	14	1	19:44:54	10:38:54	00:03:00	Lob	exit	T	7
2016-08-25	14	1	19:45:49	10:39:49	00:03:55	Lob	exit	T	1
2016-08-25	14	1	19:52:49	10:46:49	00:10:55	Lob	F_attempt	B	11
2016-08-25	14	1	19:55:49	10:49:49	00:13:55	Lob	S_attempt	T	13
2016-08-25	14	1	19:58:37	10:52:37	00:16:43	Lob	exit	T	2
2016-08-25	14	1	19:58:51	10:52:51	00:16:57	Lob	S_attempt	T	7
2016-08-25	14	1	19:59:28	10:53:28	00:17:34	Lob	exit	K	2
2016-08-25	14	1	20:01:43	10:55:43	00:19:49	Lob	F_attempt	T	31
2016-08-25	14	1	20:02:40	10:56:40	00:20:46	Lob	S_attempt	T	11
2016-08-25	14	1	20:03:10	10:57:10	00:21:16	Lob	exit	T	7
2016-08-25	14	1	20:05:21	10:59:21	00:23:27	Lob	S_attempt	T	6
2016-08-25	14	1	20:08:22	11:02:22	00:26:28	Lob	exit	T	1
2016-08-25	14	1	20:08:50	11:02:50	00:26:56	Lob	S_attempt	T	7
2016-08-25	14	1	20:09:44	11:03:44	00:27:50	Lob	S_attempt	T	10
2016-08-25	14	1	20:10:06	11:04:06	00:28:12	Lob	exit	T	1
2016-08-25	14	1	20:11:28	11:05:28	00:29:34	Lob	exit	T	2
2016-08-25	14	1	20:12:24	11:06:24	00:30:30	Lob	F_attempt	E	42
2016-08-25	14	1	20:16:53	11:10:53	00:34:59	Lob	exit	B	1
2016-08-25	14	1	20:20:13	11:14:13	00:02:56	Lob	S_attempt	T	2
2016-08-25	14	1	20:20:26	11:14:26	00:03:09	Lob	exit	T	7
2016-08-25	14	1	20:21:17	11:15:17	00:04:00		end			4
2016-09-06	15	1	15:40:00	00:00:00	00:01:00		start
2016-09-06	15	1	15:42:34	00:02:34	00:03:34	GC	feeding		1390
2016-09-06	15	1	15:43:07	00:03:07	00:04:07	Lob	F_attempt	E	20
2016-09-06	15	1	15:43:30	00:03:30	00:04:30	Lob	S_attempt	T	1
2016-09-06	15	1	15:45:32	00:05:32	00:06:32	Lob	S_attempt	B	12
2016-09-06	15	1	15:45:53	00:05:53	00:06:53	Lob	exit	T	1
2016-09-06	15	1	15:45:56	00:05:56	00:06:56	GC	feeding		2019
2016-09-06	15	1	15:46:01	00:06:01	00:07:01	Lob	exit	T	2
2016-09-06	15	1	15:48:41	00:08:41	00:09:41	Lob	S_attempt	B	3
2016-09-06	15	1	15:49:05	00:09:05	00:10:05	Lob	S_attempt	T	3
2016-09-06	15	1	15:49:13	00:09:13	00:10:13	Lob	exit	B	1
2016-09-06	15	1	15:52:01	00:12:01	00:13:01	GC	feeding		1270
2016-09-06	15	1	16:05:28	00:25:28	00:26:28	Lob	exit	T	1
2016-09-06	15	1	16:06:06	00:26:06	00:27:06	Lob	S_attempt	B	4
2016-09-06	15	1	16:11:10	00:31:10	00:32:10	Lob	exit	T	1
2016-09-06	15	1	16:13:07	00:33:07	00:34:07	Lob	S_attempt	E	2
2016-09-06	15	1	16:13:55	00:33:55	00:34:55	Lob	S_attempt	B	1
2016-09-06	15	1	16:15:16	00:35:16	00:00:53	Lob	F_attempt	E	3
2016-09-06	15	1	16:16:11	00:36:11	00:01:48	Lob	S_attempt	P	3
2016-09-06	15	1	16:17:27	00:37:27	00:03:04	Lob	feeding		75
2016-09-06	15	1	16:19:29	00:39:29	00:05:06	Lob	feeding		26
2016-09-06	15	1	16:19:42	00:39:42	00:05:19	Lob	exit	B	1
2016-09-06	15	1	16:20:19	00:40:19	00:05:56	GC-Lob	aggression		6
2016-09-06	15	1	16:21:00	00:41:00	00:06:37	GC-Lob	aggression		3
2016-09-06	15	1	16:21:01	00:41:01	00:06:38	Lob	F_attempt	E	8
2016-09-06	15	1	16:22:06	00:42:06	00:07:43	GC	feeding		517
2016-09-06	15	1	16:25:38	00:45:38	00:11:15	GC	feeding		241
2016-09-06	15	1	16:25:39	00:45:39	00:11:16	Lob	S_attempt	B	3
2016-09-06	15	1	16:26:42	00:46:42	00:12:19	Lob	exit	T	1
2016-09-06	15	1	16:32:03	00:52:03	00:17:40	Lob	S_attempt	T	2
2016-09-06	15	1	16:32:18	00:52:18	00:17:55	Lob	exit	B	1
2016-09-06	15	1	16:32:59	00:52:59	00:18:36	Lob	S_attempt	B	3
2016-09-06	15	1	16:33:11	00:53:11	00:18:48	Lob	exit	B	6
2016-09-06	15	1	16:39:40	00:59:40	00:25:17	Lob	S_attempt	T	2
2016-09-06	15	1	16:39:49	00:59:49	00:25:26	Lob	exit	T	1
2016-09-06	15	1	16:39:59	00:59:59	00:25:36	Lob	S_attempt	B	5
2016-09-06	15	1	16:40:29	01:00:29	00:26:06	GC	feeding		162
2016-09-06	15	1	16:41:39	01:01:39	00:27:16	Lob	S_attempt	E	131
2016-09-06	15	1	16:41:49	01:01:49	00:27:26	GC-Lob	aggression		12
2016-09-06	15	1	16:43:48	01:03:48	00:29:25	Lob	F_attempt	E	3
2016-09-06	15	1	16:44:02	01:04:02	00:29:39	Lob	feeding		20
2016-09-06	15	1	16:44:18	01:04:18	00:29:55	Lob	S_attempt	E	125
2016-09-06	15	1	16:47:10	01:07:10	00:32:47	Lob	feeding		80
2016-09-06	15	1	16:49:26	01:09:26	00:35:03	Lob	feeding		20
2016-09-06	15	1	16:50:52	01:10:52	00:01:06	Lob	feeding		22
2016-09-06	15	1	16:59:34	01:19:34	00:09:48	Lob	F_attempt		130
2016-09-06	15	1	16:59:37	01:19:37	00:09:51	GC-Lob	aggression		167
2016-09-06	15	1	17:06:55	01:26:55	00:17:09	Lob	S_attempt	B	3
2016-09-06	15	1	17:08:03	01:28:03	00:18:17	Lob	exit	T	1
2016-09-06	15	1	17:12:02	01:32:02	00:22:16	Lob	F_attempt	E	47
2016-09-06	15	1	17:16:33	01:36:33	00:26:47	Lob	S_attempt	T	4
2016-09-06	15	1	17:17:05	01:37:05	00:27:19	Lob	exit	B	2
2016-09-06	15	1	17:17:56	01:37:56	00:28:10	Lob	F_attempt	E	40
2016-09-06	15	1	17:19:19	01:39:19	00:29:33	Lob	F_attempt	E	33
2016-09-06	15	1	17:20:10	01:40:10	00:30:24	Lob	F_attempt	E	92
2016-09-06	15	1	17:23:54	01:43:54	00:34:08	Lob	F_attempt	E	29
2016-09-06	15	1	17:24:51	01:44:51	00:35:05	Lob	F_attempt	E	260
2016-09-06	15	1	17:29:33	01:49:33	00:04:24	Lob	F_attempt	E	134
2016-09-06	15	1	17:41:22	02:01:22	00:16:13	Lob	F_attempt	E	39
2016-09-06	15	1	17:42:06	02:02:06	00:16:57	Lob	F_attempt	E	1
2016-09-06	15	1	17:48:45	02:08:45	00:23:36	Lob	S_attempt	T	9
2016-09-06	15	1	17:53:22	02:13:22	00:28:13	Lob	exit	T	1
2016-09-06	15	1	17:55:07	02:15:07	00:29:58	Lob	F_attempt	E	19
2016-09-06	15	1	17:56:29	02:16:29	00:31:20	Lob	F_attempt	E	23
2016-09-06	15	1	17:57:55	02:17:55	00:32:46	Lob	F_attempt	E	6
2016-09-06	15	1	17:58:22	02:18:22	00:33:13	Lob	F_attempt	E	33
2016-09-06	15	1	17:59:11	02:19:11	00:34:02	GC	feeding		42
2016-09-06	15	1	17:59:56	02:19:56	00:34:47	Lob	F_attempt	E	111
2016-09-06	15	1	18:06:55	02:26:55	00:06:23	Lob	S_attempt	T	9
2016-09-06	15	1	18:09:42	02:29:42	00:09:10	Lob	F_attempt	E	30
2016-09-06	15	1	18:10:00	02:30:00	00:09:28	Lob	exit	K	2
2016-09-06	15	1	18:13:40	02:33:40	00:13:08	Lob	F_attempt	E	15
2016-09-06	15	1	18:14:31	02:34:31	00:13:59	Lob	F_attempt	E	71
2016-09-06	15	1	18:15:27	02:35:27	00:14:55	GC	feeding		346
2016-09-06	15	1	18:17:08	02:37:08	00:16:36	Lob	S_attempt	P	1
2016-09-06	15	1	18:18:11	02:38:11	00:17:39	GC-Lob	aggression		5
2016-09-06	15	1	18:18:12	02:38:12	00:17:40	Lob	exit	K	1
2016-09-06	15	1	18:21:15	02:41:15	00:20:43	Lob	F_attempt	E	32
2016-09-06	15	1	18:25:40	02:45:40	00:25:08	Lob	S_attempt	P	3
2016-09-06	15	1	18:26:03	02:46:03	00:25:31	Lob	exit	B	1
2016-09-06	15	1	18:27:14	02:47:14	00:26:42	Lob	F_attempt	E	49
2016-09-06	15	1	18:41:00	03:01:00	00:05:05	Lob	F_attempt	E	170
2016-09-06	15	1	18:45:35	03:05:35	00:09:40	Lob	F_attempt	E	48
2016-09-06	15	1	18:49:36	03:09:36	00:13:41	Lob	S_attempt	T	6
2016-09-06	15	1	18:50:06	03:10:06	00:14:11	Lob	exit	B	1
2016-09-06	15	1	18:54:18	03:14:18	00:18:23	Lob	F_attempt	E	90
2016-09-06	15	1	19:02:41	03:22:41	00:26:46	Lob	S_attempt	T	2
2016-09-06	15	1	19:03:25	03:23:25	00:27:30	Lob	S_attempt	T	11
2016-09-06	15	1	19:03:43	03:23:43	00:27:48	Lob	exit	T	1
2016-09-06	15	1	19:05:46	03:25:46	00:29:51	Lob	exit	T	1
2016-09-06	15	1	19:09:50	03:29:50	00:33:55	Lob	F_attempt	E	92
2016-09-06	15	1	18:39:08	02:59:08	00:03:13	Lob	F_attempt	E	9
2016-09-06	15	1	18:41:49	03:01:49	00:05:54	Lob	F_attempt	E	17
2016-09-06	15	1	18:42:25	03:02:25	00:06:30	Lob	F_attempt	E	18
2016-09-06	15	1	18:44:38	03:04:38	00:08:43	Lob	F_attempt	E	19
2016-09-06	15	1	19:06:35	03:26:35	00:30:40		end			4
2016-09-07	16	1	08:42:00	00:00:00	00:01:00		start
2016-09-07	16	1	08:43:45	00:01:45	00:02:45	GC	feeding		672
2016-09-07	16	1	08:46:02	00:04:02	00:05:02	GC	feeding		1326
2016-09-07	16	1	08:46:21	00:04:21	00:05:21	GC	feeding		1292
2016-09-07	16	1	08:52:17	00:10:17	00:11:17	Lob	F_attempt	E	3
2016-09-07	16	1	08:52:32	00:10:32	00:11:32	Lob	F_attempt	E	7
2016-09-07	16	1	08:53:51	00:11:51	00:12:51	Lob	F_attempt	E	21
2016-09-07	16	1	08:54:34	00:12:34	00:13:34	Lob	F_attempt	E	40
2016-09-07	16	1	08:55:10	00:13:10	00:14:10	GC	feeding		768
2016-09-07	16	1	08:56:02	00:14:02	00:15:02	Lob	F_attempt		3
2016-09-07	16	1	08:56:15	00:14:15	00:15:15	GC	feeding		712
2016-09-07	16	1	08:57:16	00:15:16	00:16:16	Lob	F_attempt	E	15
2016-09-07	16	1	09:01:04	00:19:04	00:20:04	Lob	F_attempt	E	9
2016-09-07	16	1	09:07:21	00:25:21	00:26:21	GC	feeding		6117
2016-09-07	16	1	09:07:29	00:25:29	00:26:29	Lob	F_attempt	E	184
2016-09-07	16	1	09:14:22	00:32:22	00:33:22	Lob	F_attempt	E	40
2016-09-07	16	1	09:14:58	00:32:58	00:33:58	Lob	S_attempt	B	2
2016-09-07	16	1	09:21:56	00:39:56	00:05:33	Lob	exit	B	1
2016-09-07	16	1	09:30:49	00:48:49	00:14:26	Lob	F_attempt	E	48
2016-09-07	16	1	09:36:56	00:54:56	00:20:33	Lob	F_attempt	E	66
2016-09-07	16	1	09:38:22	00:56:22	00:21:59	Lob	F_attempt	E	39
2016-09-07	16	1	09:40:34	00:58:34	00:24:11	Lob	S_attempt	B	13
2016-09-07	16	1	09:48:07	01:06:07	00:31:44	Lob	exit	B	3
2016-09-07	16	1	09:50:23	01:08:23	00:34:00	Lob	F_attempt	E	12
2016-09-07	16	1	10:04:56	01:22:56	00:13:10	Lob	F_attempt	E	27
2016-09-07	16	1	10:06:40	01:24:40	00:14:54	Lob	S_attempt	T	34
2016-09-07	16	1	10:12:52	01:30:52	00:21:06	Lob	exit	P	12
2016-09-07	16	1	10:17:30	01:35:30	00:25:44	GC-Lob	aggression		60
2016-09-07	16	1	10:26:25	01:44:25	00:34:39	GC-Lob	aggression		87
2016-09-07	16	1	10:27:29	01:45:29	00:00:20	Lob	S_attempt	B	11
2016-09-07	16	1	10:27:50	01:45:50	00:00:41	Lob	exit	B	2
2016-09-07	16	1	10:44:02	02:02:02	00:16:53	Lob	F_attempt	E	14
2016-09-07	16	1	10:44:52	02:02:52	00:17:43	Lob	F_attempt	E	72
2016-09-07	16	1	10:46:30	02:04:30	00:19:21	Lob	misc	B
2016-09-07	16	1	10:52:51	02:10:51	00:25:42	GC	feeding		214
2016-09-07	16	1	10:56:03	02:14:03	00:28:54	Lob	S_attempt	E	18
2016-09-07	16	1	10:56:14	02:14:14	00:29:05	GC-Lob	aggression		81
2016-09-07	16	1	10:56:25	02:14:25	00:29:16	Lob	exit	E	1
2016-09-07	16	1	10:58:39	02:16:39	00:31:30	Lob	F_attempt	E	22
2016-09-07	16	1	11:01:53	02:19:53	00:34:44	DIVE	DIVE
2016-09-07	16	1	11:06:59	02:24:59	00:04:27	Lob	F_attempt	E	12
2016-09-07	16	1	11:07:01	02:25:01	00:04:29	GC-Lob	aggression		25
2016-09-07	16	1	11:08:41	02:26:41	00:06:09	Lob	F_attempt	E	65
2016-09-07	16	1	11:11:19	02:29:19	00:08:47	GC-Lob	aggression		117
2016-09-07	16	1	11:23:56	02:41:56	00:21:24	DIVE	DIVE
2016-09-07	16	1	11:25:10	02:43:10	00:22:38	GC-Lob	aggression		14
2016-09-07	16	1	11:25:58	02:43:58	00:23:26	GC-Lob	aggression		29
2016-09-07	16	1	11:31:14	02:49:14	00:28:42	Lob	F_attempt	E	26
2016-09-07	16	1	11:32:52	02:50:52	00:30:20	Lob	F_attempt	E	7
2016-09-07	16	1	11:36:54	02:54:54	00:34:22	Lob	S_attempt	E	32
2016-09-07	16	1	11:37:34	02:55:34	00:35:02	Lob	feeding		1436
2016-09-07	16	1	11:43:27	03:01:27	00:05:32	GC-Lob	aggression		19
2016-09-07	16	1	11:44:32	03:02:32	00:06:37	GC-Lob	aggression		30
2016-09-07	16	1	11:47:33	03:05:33	00:09:38	GC-Lob	aggression		31
2016-09-07	16	1	11:51:47	03:09:47	00:13:52	Lob	S_attempt	T	10
2016-09-07	16	1	11:52:59	03:10:59	00:15:04	Lob	exit	T	2
2016-09-07	16	1	11:54:44	03:12:44	00:16:49	Lob	S_attempt	B	3
2016-09-07	16	1	11:54:55	03:12:55	00:17:00	Lob	exit	B	2
2016-09-07	16	1	11:58:37	03:16:37	00:20:42	Lob	F_attempt	E	19
2016-09-07	16	1	12:01:01	03:19:01	00:23:06	Lob	S_attempt	B	9
2016-09-07	16	1	12:01:11	03:19:11	00:23:16	Lob	exit	B	1
2016-09-07	16	1	12:01:14	03:19:14	00:23:19	Lob	F_attempt	E	29
2016-09-07	16	1	12:01:43	03:19:43	00:23:48	Lob	feeding		24
2016-09-07	16	1	12:02:04	03:20:04	00:24:09	Lob	S_attempt	E	6
2016-09-07	16	1	12:02:11	03:20:11	00:24:16	Lob	exit	E	1
2016-09-07	16	1	12:03:14	03:21:14	00:25:19	GC-Lob	aggression		28
2016-09-07	16	1	12:05:48	03:23:48	00:27:53	GC-Lob	aggression		51
2016-09-07	16	1	12:05:58	03:23:58	00:28:03	Lob	S_attempt	T	3
2016-09-07	16	1	12:07:23	03:25:23	00:29:28	Lob	feeding		13
2016-09-07	16	1	12:07:43	03:25:43	00:29:48	GC-Lob	aggression		168
2016-09-07	16	1	12:08:20	03:26:20	00:30:25	Lob	exit	T	2
2016-09-07	16	1	12:11:05	03:29:05	00:33:10	GC-Lob	aggression		146
2016-09-07	16	1	12:19:47	03:37:47	00:06:29	GC-Lob	aggression		17
2016-09-07	16	1	12:20:32	03:38:32	00:07:14	GC-Lob	aggression		206
2016-09-07	16	1	12:25:23	03:43:23	00:12:05	GC-Lob	aggression		41
2016-09-07	16	1	12:26:45	03:44:45	00:13:27	GC-Lob	aggression		12
2016-09-07	16	1	12:27:36	03:45:36	00:14:18	GC-Lob	aggression		18
2016-09-07	16	1	12:28:46	03:46:46	00:15:28	GC-Lob	aggression		19
2016-09-07	16	1	12:29:16	03:47:16	00:15:58	GC-Lob	aggression		29
2016-09-07	16	1	12:30:41	03:48:41	00:17:23	GC-Lob	aggression		50
2016-09-07	16	1	12:31:35	03:49:35	00:18:17	Lob	F_attempt	E	67
2016-09-07	16	1	12:31:36	03:49:36	00:18:18	GC-Lob	aggression		24
2016-09-07	16	1	12:32:19	03:50:19	00:19:01	Lob	S_attempt	T	8
2016-09-07	16	1	12:32:59	03:50:59	00:19:41	GC-Lob	aggression		7
2016-09-07	16	1	12:34:03	03:52:03	00:20:45	Lob	F_attempt	E	22
2016-09-07	16	1	12:34:35	03:52:35	00:21:17	Lob	exit	B	2
2016-09-07	16	1	12:34:44	03:52:44	00:21:26	Lob	F_attempt	E	91
2016-09-07	16	1	12:34:54	03:52:54	00:21:36	GC-Lob	aggression		20
2016-09-07	16	1	12:35:43	03:53:43	00:22:25	GC-Lob	aggression		32
2016-09-07	16	1	12:36:40	03:54:40	00:23:22	GC-Lob	aggression		48
2016-09-07	16	1	12:37:55	03:55:55	00:24:37	GC-Lob	aggression		88
2016-09-07	16	1	12:39:55	03:57:55	00:26:37	GC-Lob	aggression		38
2016-09-07	16	1	12:40:58	03:58:58	00:27:40	GC-Lob	aggression		23
2016-09-07	16	1	12:42:10	04:00:10	00:28:52	GC-Lob	aggression		14
2016-09-07	16	1	12:42:49	04:00:49	00:29:31	GC-Lob	aggression		39
2016-09-07	16	1	12:43:36	04:01:36	00:30:18	GC-Lob	aggression		6
2016-09-07	16	1	12:44:19	04:02:19	00:31:01	GC-Lob	aggression		33
2016-09-07	16	1	12:44:31	04:02:31	00:31:13	Lob	F_attempt	E	10
2016-09-07	16	1	12:45:34	04:03:34	00:32:16	GC-Lob	aggression		16
2016-09-07	16	1	12:46:33	04:04:33	00:33:15	GC-Lob	aggression		32
2016-09-07	16	1	12:47:46	04:05:46	00:34:28	GC-Lob	aggression		11
2016-09-07	16	1	12:48:18	04:06:18	00:35:00	GC-Lob	aggression		35
2016-09-07	16	1	12:48:54	04:06:54	00:00:13	Lob	F_attempt	E	43
2016-09-07	16	1	12:49:06	04:07:06	00:00:25	GC-Lob	aggression		17
2016-09-07	16	1	12:50:01	04:08:01	00:01:20	GC-Lob	aggression		30
2016-09-07	16	1	12:50:48	04:08:48	00:02:07	GC-Lob	aggression		26
2016-09-07	16	1	12:51:55	04:09:55	00:03:14	GC-Lob	aggression		13
2016-09-07	16	1	12:53:02	04:11:02	00:04:21	GC-Lob	aggression		4
2016-09-07	16	1	12:53:52	04:11:52	00:05:11	GC-Lob	aggression		8
2016-09-07	16	1	12:54:18	04:12:18	00:05:37	GC-Lob	aggression		132
2016-09-07	16	1	12:57:15	04:15:15	00:08:34	GC-Lob	aggression		14
2016-09-07	16	1	12:57:21	04:15:21	00:08:40	Lob	S_attempt	T	6
2016-09-07	16	1	12:57:35	04:15:35	00:08:54	Lob	F_attempt	T	1
2016-09-07	16	1	12:57:51	04:15:51	00:09:10	GC-Lob	aggression		18
2016-09-07	16	1	12:58:14	04:16:14	00:09:33	Lob	exit	T	1
2016-09-07	16	1	12:58:37	04:16:37	00:09:56	GC-Lob	aggression		13
2016-09-07	16	1	12:58:54	04:16:54	00:10:13	Lob	S_attempt	E	18
2016-09-07	16	1	12:58:56	04:16:56	00:10:15	GC-Lob	aggression		17
2016-09-07	16	1	12:59:16	04:17:16	00:10:35	Lob	feeding		90
2016-09-07	16	1	13:02:26	04:20:26	00:13:45	Lob	feeding		81
2016-09-07	16	1	13:06:19	04:24:19	00:17:38	Lob	S_attempt	T	15
2016-09-07	16	1	13:06:37	04:24:37	00:17:56	Lob	exit	T	6
2016-09-07	16	1	13:14:21	04:32:21	00:25:40	Lob	F_attempt	E	33
2016-09-07	16	1	13:22:38	04:40:38	00:33:57	Lob	S_attempt	T	32
2016-09-07	16	1	13:35:23	04:53:23	00:11:19	Lob	S_attempt	E	113
2016-09-07	16	1	13:37:23	04:55:23	00:13:19	Lob	feeding		159
2016-09-07	16	1	13:37:56	04:55:56	00:13:52	Lob	exit	T	1
2016-09-07	16	1	13:40:03	04:58:03	00:15:59	Lob	exit	E	1
2016-09-07	16	1	13:40:05	04:58:05	00:16:01	Lob	S_attempt	E	16
2016-09-07	16	1	13:40:26	04:58:26	00:16:22	Lob	feeding		19
2016-09-07	16	1	13:51:07	05:09:07	00:27:03	Lob	S_attempt	E	29
2016-09-07	16	1	13:51:46	05:09:46	00:27:42	Lob	feeding		319
2016-09-07	16	1	13:54:04	05:12:04	00:30:00	Lob	F_attempt	E	9
2016-09-07	16	1	13:58:04	05:16:04	00:34:00	Lob	feeding		390
2016-09-07	16	1	14:03:23	05:21:23	00:03:56	Lob	exit	B	23
2016-09-07	16	1	14:04:46	05:22:46	00:05:19	Lob	feeding		326
2016-09-07	16	1	14:08:15	05:26:15	00:08:48	Lob	F_attempt	E	17
2016-09-07	16	1	14:18:42	05:36:42	00:19:15	Lob	F_attempt	E	33
2016-09-07	16	1	14:27:23	05:45:23	00:27:56	Lob	S_attempt	E	235
2016-09-07	16	1	14:31:20	05:49:20	00:31:53	Lob	feeding		203
2016-09-07	16	1	14:35:42	05:53:42	00:00:52	Lob	feeding		29
2016-09-07	16	1	14:37:08	05:55:08	00:02:18	Lob	feeding		80
2016-09-07	16	1	14:44:00	06:02:00	00:09:10	Lob	F_attempt	E	85
2016-09-07	16	1	14:44:50	06:02:50	00:10:00	Lob	S_attempt	T	6
2016-09-07	16	1	14:45:29	06:03:29	00:10:39	Lob	exit	B	2
2016-09-07	16	1	14:54:06	06:12:06	00:19:16	Lob	F_attempt	E	117
2016-09-07	16	1	14:57:26	06:15:26	00:22:36	Lob	F_attempt	E	32
2016-09-07	16	1	15:02:44	06:20:44	00:27:54	Lob	S_attempt	B	6
2016-09-07	16	1	15:04:54	06:22:54	00:30:04	Lob	exit	T	6
2016-09-07	16	1	15:07:45	06:25:45	00:32:55	Lob	F_attempt	E	24
2016-09-07	16	1	15:09:32	06:27:32	00:34:42	Lob	F_attempt	E	29
2016-09-07	16	1	15:10:39	06:28:39	00:00:26	Lob	F_attempt	E	1
2016-09-07	16	1	15:12:17	06:30:17	00:02:04	Lob	F_attempt	E	20
2016-09-07	16	1	15:32:04	06:50:04	00:21:51	Lob	F_attempt	E	46
2016-09-07	16	1	15:34:49	06:52:49	00:24:36	Lob	F_attempt	E	4
2016-09-07	16	1	15:35:25	06:53:25	00:25:12	Lob	F_attempt	E	8
2016-09-07	16	1	15:36:21	06:54:21	00:26:08	Lob	F_attempt	E	24
2016-09-07	16	1	15:48:42	07:06:42	00:03:06	Lob	F_attempt	E	137
2016-09-07	16	1	15:55:11	07:13:11	00:09:35	Lob	S_attempt	B	18
2016-09-07	16	1	15:56:40	07:14:40	00:11:04	Lob	exit	B	3
2016-09-07	16	1	15:57:09	07:15:09	00:11:33	Lob	S_attempt	B	6
2016-09-07	16	1	15:57:42	07:15:42	00:12:06	Lob	exit	B	3
[truncated: 8,000 more rows]
