# Supplementary material for: A field-based investigation of behavioural interactions between invasive green crab ( Carcinus maenas ), rock crab ( Cancer irroratus ), and American lobster ( Homarus americanus ) in southern Newfoundland
Source: PeerJ journal article supplement (doi:10.7717/peerj.8444), 2020-02-12

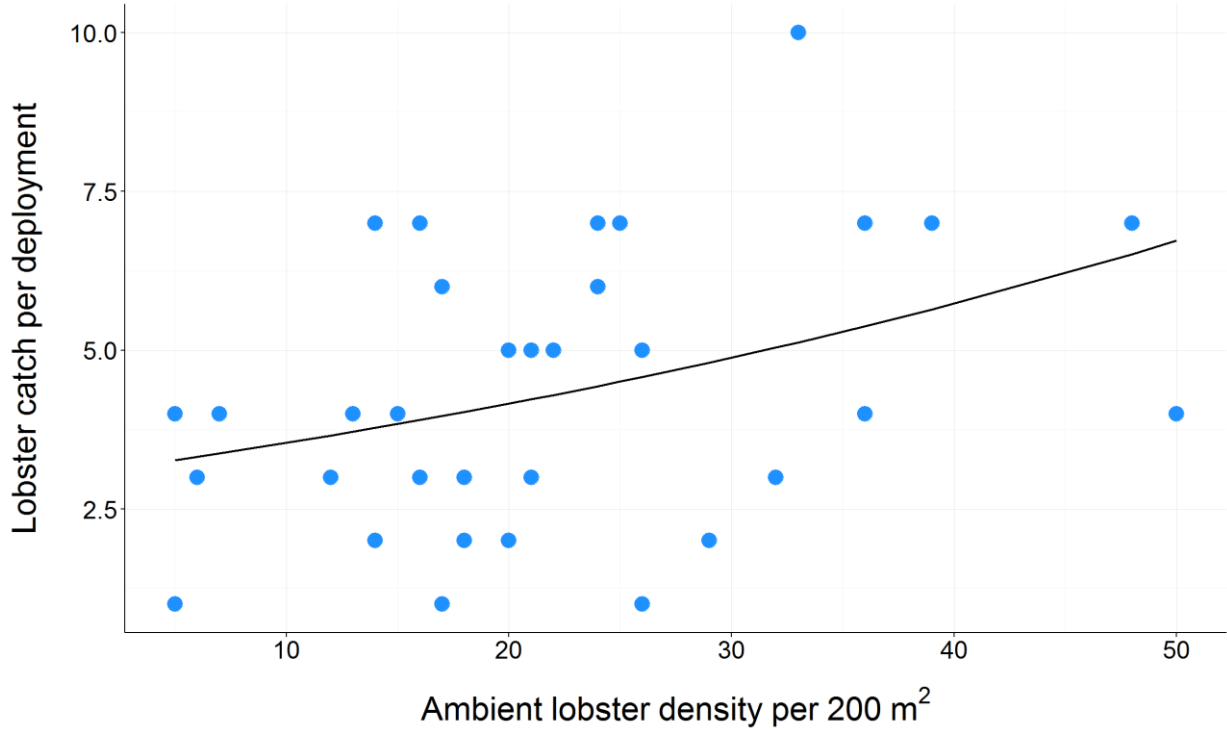

Supplement: Supplementary_Figure_7.pdf [file Supplementary_Figure_7.pdf]
