# Supplementary material for: A field-based investigation of behavioural interactions between invasive green crab (Carcinus maenas), rock crab (Cancer irroratus), and American lobster (Homarus americanus) in southern Newfoundland
Source: PeerJ. 2020 Feb 12;8:e8444. doi: 10.7717/peerj.8444 (PMC7023827; doi:10.7717/peerj.8444)
Supplement: Table S1 — Blank values in the SCUBA columns indicate deployments where dive surveys were not conducted. [file peerj-08-8444-s008.xlsx]

## Sheet: Sheet1
Date	Deployment	Site	Pre-stocking condition	Lobster catch	Green crab catch	Rock crab catch	Ambient lobster density (SCUBA)	Ambient green crab density (SCUBA)	Ambient rock crab density (SCUBA)
2016-07-04	1	Little Harbour East	GC	2	0	0
2016-07-04	1	Little Harbour East	RC	3	0	0
2016-07-04	1	Little Harbour East	Unstocked	1	0	0
2016-07-04	1	Little Harbour East	No cam-Unstocked	4	0	0
2016-07-04	1	Little Harbour East	No Cam-Unstocked	1	0	0
2016-07-05	2	Little Harbour East	Unstocked	1	0	0	5	0	0
2016-07-05	2	Little Harbour East	RC	4	0	0	5	0	0
2016-07-05	2	Little Harbour East	GC	4	0	0	13	0	0
2016-07-05	2	Little Harbour East	No Cam-Unstocked	2	0	0
2016-07-05	2	Little Harbour East	No Cam-Unstocked	1	0	0
2016-07-06	3	Little Harbour East	GC	3	0	0	6	8	1
2016-07-06	3	Little Harbour East	RC	2	0	0	18	0	5
2016-07-06	3	Little Harbour East	Unstocked	2	0	0	20	1	5
2016-07-06	3	Little Harbour East	No Cam-Unstocked	2	0	0
2016-07-06	3	Little Harbour East	No Cam-Unstocked	2	0	0
2016-07-07	4	Little Harbour East	GC	7	0	0	48	0	5
2016-07-07	4	Little Harbour East	RC	7	0	0	39	0	3
2016-07-07	4	Little Harbour East	Unstocked	4	0	0	50	0	9
2016-07-07	4	Little Harbour East	No Cam-Unstocked	8	0	0
2016-07-07	4	Little Harbour East	No Cam-Unstocked	2	0	0
2016-07-18	5	Little Bay East	Unstocked	0	0	0
2016-07-18	5	Little Bay East	RC	1	0	0
2016-07-18	5	Little Bay East	No Cam-Unstocked	1	0	0
2016-07-18	5	Little Bay East	GC	0	0	0
2016-07-18	5	Little Bay East	No Cam-Unstocked	0	5	2
2016-07-19	6	Little Bay East	RC	0	0	0
2016-07-19	6	Little Bay East	Unstocked	1	0	0
2016-07-19	6	Little Bay East	No Cam-Unstocked	0	0	0
2016-07-19	6	Little Bay East	GC	0	1	1
2016-07-19	6	Little Bay East	No Cam-Unstocked	1	0	0
2016-08-08	7	Little Harbour East	GC	0	0	0
2016-08-08	7	Little Harbour East	RC	3	0	0
2016-08-08	7	Little Harbour East	Unstocked	11	0	0
2016-08-08	7	Little Harbour East	No Cam-Unstocked	4	0	0
2016-08-08	7	Little Harbour East	No Cam-Unstocked	8	0	0
2016-08-09	8	Little Harbour East	RC	3	0	0	21	0	0
2016-08-09	8	Little Harbour East	Unstocked	7	0	0	14	0	0
2016-08-09	8	Little Harbour East	GC	4	0	0	7	0	1
2016-08-09	8	Little Harbour East	No Cam-Unstocked	2	0	0
2016-08-09	8	Little Harbour East	No Cam-Unstocked	6	0	0
2016-08-10	9	Little Harbour East	Unstocked	2	0	0	14	0	1
2016-08-10	9	Little Harbour East	RC	3	0	0	16	0	0
2016-08-10	9	Little Harbour East	GC	4	0	0	36	0	3
2016-08-10	9	Little Harbour East	No Cam-Unstocked	1	0	0
2016-08-10	9	Little Harbour East	No Cam-Unstocked	3	0	0
2016-08-11	10	Little Harbour East	GC	7	0	0	25	0	1
2016-08-11	10	Little Harbour East	RC	5	0	0	16	0	3
2016-08-11	10	Little Harbour East	Unstocked	7	0	0	16	0	3
2016-08-11	10	Little Harbour East	No Cam-Unstocked	2	0	0
2016-08-11	10	Little Harbour East	No Cam-Unstocked	1	0	0
2016-08-22	11	Little Harbour East	GC	6	0	0
2016-08-22	11	Little Harbour East	RC	3	0	0
2016-08-22	11	Little Harbour East	Unstocked	5	0	0
2016-08-22	11	Little Harbour East	No Cam-Unstocked	7	0	0
2016-08-22	11	Little Harbour East	No Cam-Unstocked	5	0	0
2016-08-23	12	Little Harbour East	Unstocked	10	0	0	33	0	3
2016-08-23	12	Little Harbour East	RC	1	0	0	26	0	0
2016-08-23	12	Little Harbour East	GC	5	0	0	20	0	1
2016-08-23	12	Little Harbour East	No Cam-Unstocked	1	0	0
2016-08-23	12	Little Harbour East	No Cam-Unstocked	7	0	0
2016-08-24	13	Little Harbour East	Unstocked	7	0	0	24	0	1
2016-08-24	13	Little Harbour East	RC	3	0	0	32	0	0
2016-08-24	13	Little Harbour East	GC	2	0	0	29	0	3
2016-08-24	13	Little Harbour East	No Cam-Unstocked	18	0	0
2016-08-24	13	Little Harbour East	No Cam-Unstocked	4	0	0
2016-08-25	14	Little Harbour East	GC	4	0	0	15	0	2
2016-08-25	14	Little Harbour East	RC	1	0	0	17	0	1
2016-08-25	14	Little Harbour East	Unstocked	6	0	0	17	0	0
2016-08-25	14	Little Harbour East	No Cam-Unstocked	3	0	0
2016-08-25	14	Little Harbour East	No Cam-Unstocked	6	0	0
2016-09-06	15	Little Harbour East	No Cam-Unstocked	4	0	0
2016-09-06	15	Little Harbour East	GC	4	0	0
2016-09-06	15	Little Harbour East	RC	6	0	0
2016-09-06	15	Little Harbour East	Unstocked	5	0	0
2016-09-06	15	Little Harbour East	No Cam-Unstocked	8	0	0
2016-09-07	16	Little Harbour East	GC	5	0	0	22	0	0
2016-09-07	16	Little Harbour East	RC	3	0	0	18	0	1
2016-09-07	16	Little Harbour East	Unstocked	6	0	0	24	0	0
2016-09-07	16	Little Harbour East	No Cam-Unstocked	5	0	0
2016-09-07	16	Little Harbour East	No Cam-Unstocked	5	0	0
2016-09-08	17	Little Harbour East	Unstocked	7	0	0	36	0	2
2016-09-08	17	Little Harbour East	GC	3	0	0	12	0	2
2016-09-08	17	Little Harbour East	RC	5	0	0	21	0	3
2016-09-08	17	Little Harbour East	No Cam-Unstocked	5	0	0
2016-09-08	17	Little Harbour East	No Cam-Unstocked	2	0	0
