# Supplementary material for: A field-based investigation of behavioural interactions between invasive green crab (Carcinus maenas), rock crab (Cancer irroratus), and American lobster (Homarus americanus) in southern Newfoundland
Source: PeerJ. 2020 Feb 12;8:e8444. doi: 10.7717/peerj.8444 (PMC7023827; doi:10.7717/peerj.8444)
Supplement: Table S2 [file peerj-08-8444-s009.xlsx]

## Sheet: Sheet1
Deployment	Pre-stocking condition	Species	Total entry attempts	Total successful entries	Total exits
3	GC pre-stocked	GC	17	13	11
5	GC pre-stocked	GC	7	6	3
5	GC pre-stocked	RC	6	6	5
5	RC pre-stocked	RC	2	2	1
5	Unstocked	GC	1	1	1
6	GC pre-stocked	GC	2	1	0
6	GC pre-stocked	RC	1	1	0
6	RC pre-stocked	GC	10	4	3
6	RC pre-stocked	RC	3	2	2
6	Unstocked	GC	8	2	1
6	Unstocked	RC	4	4	4
11	RC pre-stocked	RC	1	1	1
17	GC pre-stocked	RC	1	1	0
